# Supplementary material for: How COVID-19 has affected general practice consultations and income: general practitioner cross-sectional population survey evidence from Ireland
Source: PubMed Central journal article supplement — BMJ Open. 2021 Apr 8;11(4):e044685. doi: 10.1136/bmjopen-2020-044685 (PMC8039245; doi:10.1136/bmjopen-2020-044685), 2021-04-08
Supplement: bmjopen-2020-044685.draft_revisions.pdf [file bmjopen-2020-044685.draft_revisions.pdf]

# BMJ Open

BMJ Open is committed to open peer review. As part of this commitment we make the peer review history of every article we publish publicly available.

When an article is published we post the peer reviewers' comments and the authors' responses online. We also post the versions of the paper that were used during peer review. These are the versions that the peer review comments apply to.

The versions of the paper that follow are the versions that were submitted during the peer review process. They are not the versions of record or the final published versions. They should not be cited or distributed as the published version of this manuscript.

BMJ Open is an open access journal and the full, final, typeset and author-corrected version of record of the manuscript is available on our site with no access controls, subscription charges or pay-per-view fees (<http://bmjopen.bmj.com>).

If you have any questions on BMJ Open's open peer review process please email [info.bmjopen@bmj.com](mailto:info.bmjopen@bmj.com)

# BMJ Open

## How COVID-19 has affected general practice consultations, stress and income – survey evidence from Ireland

|                               |                                                                                                                                                       |
|-------------------------------|-------------------------------------------------------------------------------------------------------------------------------------------------------|
| Journal:                      | <i>BMJ Open</i>                                                                                                                                       |
| Manuscript ID                 | bmjopen-2020-044685                                                                                                                                   |
| Article Type:                 | Original research                                                                                                                                     |
| Date Submitted by the Author: | 14-Sep-2020                                                                                                                                           |
| Complete List of Authors:     | Homeniuk, Robyn; Irish College of General Practitioners, Research and Innovation<br>Collins, Claire; Irish College of General Practitioners, Research |
| Keywords:                     | Telemedicine < BIOTECHNOLOGY & BIOINFORMATICS, COVID-19, PRIMARY CARE                                                                                 |
|                               |                                                                                                                                                       |

SCHOLARONE™  
Manuscripts

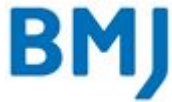

I, the Submitting Author has the right to grant and does grant on behalf of all authors of the Work (as defined in the below author licence), an exclusive licence and/or a non-exclusive licence for contributions from authors who are: i) UK Crown employees; ii) where BMJ has agreed a CC-BY licence shall apply, and/or iii) in accordance with the terms applicable for US Federal Government officers or employees acting as part of their official duties; on a worldwide, perpetual, irrevocable, royalty-free basis to BMJ Publishing Group Ltd ("BMJ") its licensees and where the relevant Journal is co-owned by BMJ to the co-owners of the Journal, to publish the Work in this journal and any other BMJ products and to exploit all rights, as set out in our [licence](#).

The Submitting Author accepts and understands that any supply made under these terms is made by BMJ to the Submitting Author unless you are acting as an employee on behalf of your employer or a postgraduate student of an affiliated institution which is paying any applicable article publishing charge ("APC") for Open Access articles. Where the Submitting Author wishes to make the Work available on an Open Access basis (and intends to pay the relevant APC), the terms of reuse of such Open Access shall be governed by a Creative Commons licence – details of these licences and which [Creative Commons](#) licence will apply to this Work are set out in our licence referred to above.

Other than as permitted in any relevant BMJ Author's Self Archiving Policies, I confirm this Work has not been accepted for publication elsewhere, is not being considered for publication elsewhere and does not duplicate material already published. I confirm all authors consent to publication of this Work and authorise the granting of this licence.

## How COVID-19 has affected general practice consultations, stress and income – survey evidence from Ireland

Robyn Homeniuk<sup>a</sup> and Claire Collins<sup>b</sup>

- a. Research Officer, Department of Research and Innovation Irish College of General Practitioners, 4-5 Lincoln Place, Dublin D2. Email: robyn.homeniuk@icgp.ie
- b. Director, Department of Research and Innovation Irish College of General Practitioners, 4-5 Lincoln Place, Dublin D2. Email: Claire.collins@icgp.ie

For peer review only

## Abstract

### *Objectives*

How general practice is delivered in many countries has drastically changed due to the COVID-19 pandemic. This study aimed to answer the question of how general practice has changed in Ireland in response to COVID-19.

### *Design*

The Irish College of General Practitioners surveyed its membership before and after the global pandemic hit Ireland using an online survey instrument to capture consultation rates and mode of delivery.

### *Setting*

This study focuses on primary care, specifically general practice, in Ireland.

### *Participants*

A total of 526 general practices across Ireland submitted responses to the survey in February 2020 before the global pandemic; 680 general practices responded to the second survey in June 2020.

### *Main outcome measures*

The type of consultations by general practitioners and practice nurses in both surveys is the main outcome measure used in this study. Practice changes and stress factors facing general practitioners were also used to gauge changes caused by the pandemic response.

### *Results*

The proportion of telemedicine general practitioner appointments increased from 10.5% to 56.9%. Changing work practices and income concerns have replaced workload as the most significant stressor for general practitioners. The majority (84%) reported reduced practice profit.

### *Conclusions*

While the world gets used to a new normal, it is clear that the way general practice is delivered will not return to as before and that increased telemedicine is likely. However, it is necessary to assess the impact of this shift on patient health and to assess healthcare provider and patient experience to ensure continued high-quality care and patient safety.

### *Strengths and Limitations*

- **A key strength of this study is the large number of general practitioners who engaged with the surveys. It was possible to survey a third of all practices in Ireland at both time points.**
- **One of the weaknesses of the study is that the survey was self-selecting, which could have biased the responses in some cases. Furthermore, it was not possible to identify practices and match their responses from the first to the second survey.**
- **We did not collect sociodemographic information, hence it was not possible to control for deprivation levels and other factors that may affect health care utilisation.**
- **Due to the large number of responding practices, we were able to get data covering every county in Ireland in both the pre-COVID-19 and during COVID-19 surveys. The volume of responses makes our findings more generalizable.**

## Introduction

A cluster of 'atypical viral pneumonia' cases was diagnosed in Wuhan City, China in December 2019 [1]. By 9 January 2020, Chinese authorities found the cause of the outbreak was a novel coronavirus [2] – later named COVID-19. The WHO declared an international public health emergency [3] and by the end of February 2020, Ireland had its first case. National lockdown measures commenced in March 2020 and included recommendations for general practitioners (GPs) to observe physical distancing, wear personal protective equipment (PPE), and use telephone triage and appointments to reduce face-to-face appointments [4]. Epidemiologists globally have been monitoring the progression of this infection while governments have been developing and deploying emergency pandemic responses. The need to have global and national emergency management plans is well documented [3] since the outbreak of SARS in 2003. Previous outbreaks have proven that contagious diseases can put intense pressure on health systems, especially on general practice as it is the frontline of the medical response [5]. GPs have expressed their past uncertainty about how to respond to a pandemic [5]. Indeed, in response to the H1N1 pandemic, primary care staff struggled with implementing new workflows [6]. In Ireland, comprehensive preparedness plans are in place for handling public health emergencies. These plans follow WHO [7] and ECDC [8] guidance and are coordinated by the National Public Health Emergency Team [9].

The majority of GPs in Ireland are self-employed, getting paid based on the number of patients they see annually; last year the Irish Health Service Executive (HSE) reported €429.14m in GP fees, €160.09m in allowances, and €0.31m for development [10]. This makes up 69% of GP reimbursement, with the remaining portion paid by private health insurance and out of pocket payments [11]. Before the start of this pandemic, general practice saw an increasingly high workload due to its position as the centrepiece of Irish healthcare [12]. A tendency towards acute, reactive care pushed the Irish health system to maximum capacity, and as demand grew so did the need for added investment in community-based care [13]. With the onset of COVID-19, the face of general practice in Ireland, as in many countries, drastically changed, with developing clinical models [14] and consultation strategies having an impact on primary care [15]. Irish GPs quickly noticed that patients with acute and chronic conditions were avoiding attending appointments, virtually or not [16]. Continuity of routine care might be at risk because of the pandemic, and the general health of the population is a key concern for primary care [13].

This paper reports on the changes experienced and in particular those in consultation rates and delivery methods in Irish general practice during the COVID-19 pandemic. At the beginning of February 2020, the ICGP surveyed its membership before the global pandemic reached Irish shores. In June 2020, the ICGP again surveyed its membership regarding the impact of COVID-19 on general practice.

## Methods

In early 2020, the Irish College of General Practitioners (ICGP) – the professional body for GPs in Ireland - designed an online survey to capture practice activities, stressors, and demographic details regarding general practices in Ireland.

It was distributed to 3,378 members both before (February 2020) and during (June 2020) the coronavirus pandemic. It was not sent to trainees, retired GPs, or GPs registered in Ireland working abroad. The second survey was updated to include additional questions and response categories

1  
2  
3 that specifically related to the pandemic. The survey sample was self-selecting, with the survey  
4 period open for a n/two-week period to ensure a significant number of responses were received.  
5

6 Only one survey for each practice was requested. Ethical approval for both surveys was obtained  
7 and consent from practices for participation and data processing was confirmed at the start of each  
8 survey. The online survey was fully anonymous and no IP addresses were collected.  
9

10 All data is based on survey responses as there is no national data extraction from Irish general  
11 practice where GPs are self-employed and provide services to public patients under a contract with  
12 the national Health Service Executive (HSE). Consultation rates include face-to-face consultations,  
13 telephone consultations, home visits and visits to nursing homes reported by practices who  
14 responded to the survey. Data was returned on the most recent working day. The figure for GPs on  
15 the day was used to calculate mean consultations per GP daily. Out of hours services in Ireland are  
16 provided and recorded separately and hence are not included in these figures. The Irish Department  
17 of Health has previously reported just under one million out-of-hours GP contacts in 2019 [17]. To  
18 determine per person figures, we used the most recent population estimation released by the  
19 Central Statistics Office [18], which was 4,921,500 as of April 2019.  
20  
21  
22  
23

24 We conducted the analysis using SPSS V25 software, using descriptive analysis. For numerical data,  
25 means were used for comparisons and to conduct statistical tests as appropriate. Average  
26 consultation numbers are based on the consultation numbers provided by the survey, and workforce  
27 information from previous research [13, 19] was used to extrapolate findings. Chi-square tests were  
28 used for categorical comparisons. Pearson's and Spearman's tests were used to test for correlation  
29 between continuous variables. T-tests and F-tests were used to compare means as appropriate.  
30 Missing data was removed when completing calculations.  
31  
32

## 33 **Results**

### 34 *Survey Population*

35  
36 There were 526 valid responses in the first survey - 32% of all 1635 practices in Ireland [20], with  
37 1508.42 FTE GPs overall working in these practices and 1257.90 (83%) FTE GPs working on the day  
38 where clinical activity was recorded. In this sample, approximately one fifth (19%) of the practices  
39 were single-handed. The average number of FTE GPs at group practices was 3.3. At least one  
40 practice nurse (PN) was employed at 94% of practices with a total of 630.33 FTE PNs overall and 85%  
41 of FTE PNs working on the day of data collection. On average, practices employed 1.2 FTE PNs,  
42 although a third of practices had less than one FTE PN.  
43  
44

45  
46 City practices comprised 37% of the total, with 44% of practices located in towns and 19% in villages.  
47 There was at least one practice recorded in every county.  
48

49 In the second survey, there were 680 valid responses, estimated at 42% of all practices in Ireland. A  
50 total of 1632.10 FTE GPs worked in these practices with 1104.85 FTE GPs working on the day when  
51 clinical activity was recorded. In contrast to pre-COVID-19 figures, this is a 15% reduction in FTE GPs  
52 available during the clinical hours. There were slightly more single-handed practices in this sample  
53 at just over a quarter (28%). Group practices employed an average of 3.0 FTE GPs.  
54

55 A PN was employed by 90.2% of the practices with a total of 789.05 FTE PNs overall. On the day  
56 clinical activity was recorded, 508.95 FTE PNs were available, which means 65% of nurses were  
57 working.  
58  
59  
60

1  
2  
3 City practices comprised 36% of the total, with 46% of practices located in towns and 18% in villages  
4 and at least one practice responding in every county.  
5  
6  
7

### 8 *Consultations*

9  
10 An average of 29 consultations was recorded per working FTE GP per day before COVID-19, 87.3% of  
11 appointments occurred face-to-face, 10.5% were telemedicine and the remainder were visits to  
12 homes and nursing homes.  
13

14 Considering the most recent recorded population in Ireland [18] – we estimate Irish people visit their  
15 GP an average of 4.4 times each year.  
16

17  
18 Pre-COVID-19, PNs completed 26 consultations daily on average, split between telemedicine (18%)  
19 and face-to-face appointments.  
20

21 During-COVID-19, consultation rates have changed significantly as has the mode of consultation.  
22 Between 1104.85 FTE GPs, the daily average per GP was 23 consultations. Based on reported rates,  
23 the new average consultation number per person per year would be 2.8 visits.  
24

25 Over half of the GP consultations occurred via telemedicine and video (57%) and 41% occurred face  
26 to face. In Figure 1, the proportion of consultation by each consultation method for GPs and PNs at  
27 each time point are shown.  
28

29 [Figure 1]

30  
31 *Figure 1 GP and PN Consultations Before and During COVID-19*  
32  
33  
34

35 In the second survey, the daily average was 17 consultations per FTE PN.  
36

37 Before the pandemic, GPs conducted an average of eight telemedicine consultations daily increasing  
38 to an average of 13 during the pandemic. The overall average daily consultation rate for GPs  
39 decreased from 29 to 27 per day over the same period. Face-to-face appointments decreased from  
40 87% to 41% of all GP consultations, with the average per practice decreasing from 62 in February to  
41 20 in June 2020. Comparatively, before the pandemic, PNs conducted an average of 4.5 telemedicine  
42 consultations daily increasing to 5.5 in the second survey. Face-to-face appointments dropped from  
43 82.4% to 67.6 % of all PN consultations. Before the pandemic began, practice nurses had a higher  
44 proportion of telemedicine appointments than GPs – 17.6% of PN appointments in February 2020  
45 compared to only 10.5% of GP appointments. In the second survey, 56.9% of GP appointments were  
46 via telemedicine compared to 32.4% of PN appointments.  
47  
48  
49

### 50 51 *What is causing the most stress for GPs?*

52  
53 In the first survey, from a list of items provided, 55% of GPs completing the survey on behalf of their  
54 practice considered workload as the most significant stressor GPs face. Following this, work-life  
55 balance (14%) and availability of locums (11%) were considered common sources of stress. In the  
56 free-text portion of the survey, GPs said it was hard to separate the stressors because the heavy  
57 workload affects things like work/life balance. In the second survey, five new categories reflecting  
58  
59  
60



1  
2  
3 recent changes were added to the list. Figure 2 shows the change between options provided in the  
4 survey question that asked GPs to choose their most significant source of stress.  
5  
6  
7

8 [Figure 2]  
9

10 *Figure 2 Most Significant Stressor for GPs*

11 In the second survey in June 2020, during the COVID-19 pandemic, respondents considered that the  
12 main sources of stress for GPs were changing work practices (29%) and income concerns (27.1%).  
13 Only 12.7% considered the workload as the main stressor for GPs at this time.  
14  
15  
16

17  
18 *Practice changes*  
19

20 Overall, 84.3% of practices reported a decrease in profitability during the pandemic, although only  
21 half of the practices had gone through a formal business performance assessment. Across all  
22 practice sizes, there is an expected average decrease in profitability of 35.2% and an average of 17%  
23 for an increase in profitability. Only 19% of practices were expecting an increase in profitability.  
24

25 More group practices completed formal business assessments comparing profit from the first two  
26 months of 2020 (before COVID-19), 57% of group practices had done this compared to 32% of single-  
27 handed practices. Single-handed practices were estimating an average loss of 42% of profits  
28 compared to the average estimate of 33% loss for group practices. The lower number of formal  
29 assessments by single-handed practices could explain part of this difference, through overestimates  
30 by GPs when completing the survey.  
31  
32

33 A statistically significant negative correlation ( $p = .013$ ) between practice size and estimated  
34 percentage change in profit was found when using the Pearson correlation test ( $r = -1.119$ ) indicating  
35 the percentage change in profit went down as the number of FTE GPs increased.  
36

37 To manage the financial impact of COVID-19, 45% of practices made changes to reduce the strain. In  
38 the following chart, the proportion of these 308 practices taking different actions is visible. The most  
39 popular measure was to ask staff to take their annual leave early.  
40  
41

42 There were no significant relationships between practice size and implementing the listed measures.  
43

44 One in three practices told us they had staff who were affected by redundancies, reduced hours or  
45 reduced salary. The most affected staff has been receptionists with 48% of practices who reduced  
46 staff highlighting these staff. Following that, 39%, salaried GPs and practice nurses were affected by  
47 these changes. Forty-six GPs left comments as well, most highlighting that they had been the one to  
48 reduce their personal salary for the sake of keeping their staff. Figure 3 shows the proportion of  
49 practices that used the following methods to recover income during the pandemic.  
50  
51

52  
53 [Figure 3]  
54

55 *Figure 3 Measures implemented by practices to alleviate financial concerns*  
56  
57  
58  
59  
60

1  
2  
3 Respondents were asked if they had noticed a decline in certain patient groups. Overall, there was a  
4 reported decline in non-COVID-19 related consultations. Almost all practices, 93%, noticed a decline  
5 for under 6's, 80% saw a decline for over 70's, 77% had less non-COVID-19 visits from people with  
6 chronic conditions, and 57% saw a decline in visits from people with mental health concerns. Figure  
7 4 shows the decline in non-COVID-19 related consultations from each of these patient groups at  
8 group and single-handed practices. Single-handed practices had a larger decline in all but the under  
9 6 year old patient group.  
10  
11

12 [Figure 4]

13 *Figure 4 Reported decline in non-COVID-19 patient groups by practice type*  
14  
15  
16  
17

## 18 Discussion

### 19 *Principal Findings*

20  
21 The proportion of the practices' FTE staff on duty decreased from 83% of FTE GPs and 85% of FTE  
22 PNs to 68% and 64% respectively. The average number of daily consultations per FTE has dropped by  
23 six for GPs and seven for PNs. The extrapolated average annual GP consultation rate per head of  
24 population decreased from 4.4 per annum to 2.8 per annum based on our data. Practices' finances  
25 have been impacted as well, with 84.3% reporting reduced profits.  
26  
27

28 A shift to telemedicine was observed from 10.5% of all GP consultations and 17.6% of PN  
29 consultations pre-COVID-19 to 57% and 32% respectively in June 2020.  
30

31 Another key difference was the change in significant reported stressors for GPs. Pre-COVID-19, the  
32 workload in general practice was viewed as the most significant source of stress by 55% of  
33 respondents. In the second survey, a shift was observed with changing practice requirements (27%)  
34 and income (25%) considered as the two major sources of stress with workload only mentioned by  
35 12%.  
36  
37

### 38 *Strengths and weaknesses of the study*

39  
40 Our surveys are based on a self-selecting sample for both surveys which comes with inherent bias.  
41 The responding samples are different and we cannot do a direct practice-based comparison;  
42 however, key comparisons indicated that the samples were comparable. We did not collect  
43 information that would allow for meaningful geographical analyses, and therefore could not account  
44 for regional and socioeconomic differences which could affect consultation rates. Data is based on  
45 reported data and not from data extracted from general practice systems and hence may lead to  
46 under- or over-reporting. Finally, our national figures are extrapolated data from two points in time  
47 rather than continuously updated information. As the pandemic is ongoing, there are likely unknown  
48 factors that could affect consultation rates.  
49  
50

51 One of the key strengths in these surveys is the number of FTE GPs represented. In the pre-COVID-19  
52 survey, there were 1,508.42 FTE GPs represented, employed by the 526 responding practices. In the  
53 post-COVID-19 survey, 1,647.75 FTE GPs from 680 responding practices were represented. This  
54 means 43% and 48% of registered GPs and an estimated 32% and 42% respectively of practices in  
55 Ireland were captured in each survey.  
56  
57  
58  
59  
60

1  
2  
3 *Interpretation in terms of international literature/Strengths and weaknesses compared*  
4 *to other literature*  
5

6 Since the beginning of the COVID-19 pandemic, there have been many changes rapidly implemented  
7 in healthcare across the world and they are having an impact on clinicians [15, 21]. Our study  
8 showed a decrease in GP appointments and overall in general practice (GPs and PNs). This is similar  
9 to reports in the UK [22], where the NHS has noticed a 30% decrease in the number of GP  
10 appointments compared to the same time in 2019.  
11

12  
13 Our study shows a substantial shift from 12.4% of all consultations in general practice in Ireland  
14 delivered via telemedicine to 51.5%. The UK reports are varied; however, they show a similar shift to  
15 digital consultations. With an overall 30% drop in all consultations, GPs reported consultations  
16 changing from 90-95% face-to-face to 85% remote [21, 22]. The current UK estimates are higher than  
17 ours; however, their telemedicine rate pre-COVID-19 was also higher [22]. Spain also reports an  
18 increase in the use of virtual consultations, at 68.3% during the pandemic [23]. The proportion of  
19 face-to-face GP consultations decreased from 87% to 41% in our study, showing a similar reduction  
20 to England where proportions changed from 70% to 23% [24].  
21  
22

23 The majority (84%) of our practices reported reduced practice profit, and this has been seen  
24 elsewhere with GPs in the United States of America turning to crowdfunding to help their practices  
25 [25] and most Australian GP practices also taking a hit to their income [26].  
26

27 In our second survey during the COVID-19 pandemic, changing practice requirements and financial  
28 concerns practice were the key stressors for GPs. Across Europe, new ways of working and  
29 uncertainty are putting new stress on family medicine [27].  
30  
31

32 The extrapolated average annual consultation rate per head of population decreased from 4.4 per  
33 annum to 2.8 per annum based on our data. This has been reported elsewhere in Ireland [4] and  
34 abroad [22, 23, 28].  
35

36 Similar studies comparing the impact of COVID-19 on practice consultation rates and delivery  
37 methods are rare. Much of the literature to date on delivery type changes are based on  
38 commentaries and not actual measurements [23, 27]. Some countries have national registers/data  
39 return systems, for example in the UK [23], from which data is more reliable and accurate than our  
40 method. However, there is no central data registry from general practice in Ireland and our data is  
41 limited to relying on self-reported survey data, albeit based on actual practice in-house records. A  
42 key strength of this paper is that it adds to the knowledge base in terms of the potential impact of  
43 the COVID-19 pandemic on general practice, including on stressors and finances, in the current void  
44 of such literature.  
45  
46

47 *Implications for practice*  
48

49 GPs are motivated by altruism to work during pandemics despite the high personal risk, and they are  
50 enthusiastic about further training and information [5]. However, despite preparedness planning,  
51 implementing pandemic policies faces multiple obstacles [5]. GPs are facing rapidly changing patient  
52 flows, clinical algorithms, new care pathways, and the need for new ways of delivering high-quality  
53 care [14, 23, 27, 29]. Irish GPs have implemented many changes during the COVID-19 pandemic. The  
54 RACGP recommends 'a planned and coordinated approach' when implementing a telehealth service  
55 [30]; however, due to the urgent nature of the current situation, this has not been possible.  
56 Maintaining the quality of healthcare is important in sustaining a healthy workforce, which is  
57 essential to support a healthy economy during and after the pandemic.  
58  
59  
60

1  
2  
3 Ireland, like many other countries, has taken massive steps towards the regular use of remote  
4 consultations, seemingly overnight, with previous trepidation regarding continuity of care and safety  
5 falling away out of necessity [31].  
6

7  
8 Ireland has two health strategies promoting the use of technology to enable patient-centred care  
9 nationally. Sláintecare, the current healthcare strategy in Ireland, aims to establish a national health  
10 fund that will help deliver universal healthcare and introduce comprehensive eHealth infrastructure  
11 [11]. This strategy supported the 2013 eHealth strategy, which had an objective of more affordable  
12 and more personalised care for all by capitalising on technology [32]. During the pandemic, practices  
13 across the country have swiftly transitioned to using technology such as Healthmail, electronic  
14 health records, and video or telephone consultations. Before the COVID-19 pandemic began,  
15 clinicians in primary care had used telemedicine interventions [33], but it was not the main form of  
16 care. Changes adopted during this pandemic accelerated the digitalisation of healthcare in Ireland  
17 and could lead the way to the increased adoption of digital care.  
18  
19

20  
21 Telemedicine has been viewed as a way to lower costs and see more patients [15] but was rare in  
22 Irish general practice up to now, and here, as elsewhere, there was some resistance and concern  
23 [15]. However, the current COVID-19 pandemic has resulted in remote consultations being  
24 recommended for all GPs [4]. Recommendations like these made in response to the pandemic could  
25 bring about lasting changes to the health system [21]. We need to know that the changes are  
26 effective and identify possible future health implications for patients.  
27  
28

29  
30 Furthermore, a noted decrease in consultations for non-COVID related symptoms has been  
31 observed. This could have serious impacts on patient safety with calls on patients not to self-  
32 diagnose or delay seeking treatment [16, 28]. Patients are also changing the way they use health  
33 services, with more emphasis on self-care [16]. Patient feedback will be invaluable for maintaining  
34 lasting benefits.  
35

36  
37 The COVID-19 pandemic has the potential to change general practice forever, and this does not only  
38 apply in Ireland but has been noted elsewhere [14, 15, 21, 23]. The adoption of 'total triage' systems  
39 has been seen during this pandemic whereby GPs can decide the mode of follow-up consultation,  
40 whether that is face-to-face, video call or telephone. As we look to a post-COVID landscape, there is  
41 a case for general practice retaining this to allow more flexibility in how consultations are delivered  
42 according to the needs and preferences of patients. However, telephone triage does not reduce GP  
43 workload, so we need to evaluate the impacts on workload and patient-centred care [34]. While it is  
44 unlikely that we will maintain this level of remote consultations, it is expected that how general  
45 practice functions will not return to as it was before [34, 35].  
46

47  
48 However, we should not lose sight of the relationship between the GP and patient and the  
49 importance of good communication and trust [15, 29, 34, 36]. Telemedicine does not work for all  
50 patients, and there is a need to establish what works best for different patients [15, 27]. We need to  
51 evaluate the impact of remote consultations during the COVID-19 response and understand how  
52 these impact on patient experience, health inequalities and patient-centred care.  
53

54  
55 Since the beginning of June 2020, renewed efforts have been made to reassure and encourage the  
56 public to continue seeking medical advice from their GPs by making an appointment [36, 37].  
57

#### 58 *Unanswered questions and future research*

59  
60 How general practice is delivered will not return to as before; increased telemedicine is likely. It is  
necessary to assess the impact of this shift on patient health and to assess healthcare provider and

1  
2  
3 patient experience to ensure continued high-quality care and patient safety. Furthermore, we need  
4 to understand the impact of changing work requirements and evolving consultation techniques on  
5 general practice workload and practice income and viability.  
6  
7  
8

## 9 **DECLARATIONS**

### 10 *Abbreviations*

11 ECDC – European Centre for Disease Prevention and Control

12  
13 ESRI – Economic and Social Research Institute

14  
15 FTE – Full time equivalent

16  
17 GP - General Practitioner

18  
19 HSE - Health Service Executive

20  
21 ICGP - Irish College of General Practitioners

22  
23 NHS – National Health Service (UK)

24  
25 PN - Practice Nurse

26  
27 PPE – Personal protective equipment

28  
29 RACGP – Royal Australian College of General Practitioners

30  
31 WHO - World Health Organisation  
32  
33  
34

### 35 **Copyright**

36  
37 The Corresponding Author has the right to grant on behalf of all authors and does grant on behalf of  
38 all authors, an exclusive licence (or non exclusive for government employees) on a worldwide basis  
39 to the BMJ Publishing Group Ltd to permit this article (if accepted) to be published in BMJ editions  
40 and any other BMJPG products and sublicences such use and exploit all subsidiary rights, as set out  
41 in our licence.  
42  
43  
44

### 45 **Competing interests**

46 All authors have completed the *Unified Competing Interest form* (available on request from the  
47 corresponding author) and declare: no support from any organisation for the submitted work; no  
48 financial relationships with any organisations that might have an interest in the submitted work in  
49 the previous three years, no other relationships or activities that could appear to have influenced  
50 the submitted work.  
51  
52

### 53 **Ethics approval and consent to participate**

54 Ethical approval was obtained for the study from the Irish College of General Practitioners Research  
55 Ethics Committee.  
56  
57

### 58 **Public and patient involvement**

59 Patents and members of the public were not involved in this research because it was not relevant to  
60

1  
2  
3 the study questions. The study focused on changes experienced by general practitioners who were  
4 involved in the study design as members of the ICGP board.  
5

### 6 **Consent for publication**

7  
8 Not applicable.  
9

### 10 **Availability of data and materials**

11  
12 The data is available on reasonable request to the corresponding author.  
13

### 14 **Funding**

15  
16 No funding was received for this work.  
17

### 18 **Authors' contributions**

19  
20 CC was the project principal investigator. She conceived the project idea, designed the  
21 questionnaire, undertook the data collection, supervised the data analysis and contributed to the  
22 paper.  
23

24 RH was the project research assistant. She analysed the data, undertook the analysis and  
25 contributed to the paper.  
26

27 Both authors have read and approved the final paper.  
28

29 Name of guarantor: Claire Collins.  
30

### 31 **Transparency declaration**

32  
33 The authors affirm that the manuscript is an honest, accurate, and transparent account of the study  
34 being reported; that no important aspects of the study have been omitted; and that any  
35 discrepancies from the study as planned (and, if relevant, registered) have been explained.  
36

### 37 **Acknowledgements**

38  
39 The authors wish to acknowledge the valuable contribution and time given by all participants.  
40  
41  
42  
43  
44

### 45 **References**

- 46 1. WHO Newsroom. *Timeline of WHO's response to COVID-19*. [Internet] Geneva: World  
47 Health Organisation; 29 June 2020 [updated 30 July 2020]. Available from:  
48 [https://www.who.int/china/news/detail/09-01-2020-who-statement-regarding-cluster-of-](https://www.who.int/china/news/detail/09-01-2020-who-statement-regarding-cluster-of-pneumonia-cases-in-wuhan-china)  
49 [pneumonia-cases-in-wuhan-china](https://www.who.int/china/news/detail/09-01-2020-who-statement-regarding-cluster-of-pneumonia-cases-in-wuhan-china) [Accessed 24<sup>th</sup> August 2020]
- 50 2. WHO. *WHO Statement regarding cluster of pneumonia cases in Wuhan, China*. [Internet]  
51 Geneva: World Health Organisation; 9 January 2020. Available from:  
52 [https://www.who.int/china/news/detail/09-01-2020-who-statement-regarding-cluster-of-](https://www.who.int/china/news/detail/09-01-2020-who-statement-regarding-cluster-of-pneumonia-cases-in-wuhan-china)  
53 [pneumonia-cases-in-wuhan-china](https://www.who.int/china/news/detail/09-01-2020-who-statement-regarding-cluster-of-pneumonia-cases-in-wuhan-china) [Accessed 24<sup>th</sup> August 2020]
- 54 3. WHO. *WHO Director-General's statement on IHR Emergency Committee on Novel*  
55 *Coronavirus (2019-nCoV)*. [Internet] Geneva: World Health Organisation; 30 January 2020.  
56 Available from: <https://www.who.int/dg/speeches/detail/who-director-general-s->  
57  
58  
59  
60

- 1  
2  
3  
4  
5  
6  
7  
8  
9  
10  
11  
12  
13  
14  
15  
16  
17  
18  
19  
20  
21  
22  
23  
24  
25  
26  
27  
28  
29  
30  
31  
32  
33  
34  
35  
36  
37  
38  
39  
40  
41  
42  
43  
44  
45  
46  
47  
48  
49  
50  
51  
52  
53  
54  
55  
56  
57  
58  
59  
60
- [statement-on-ihc-emergency-committee-on-novel-coronavirus-\(2019-ncov\)](#) [Accessed 24<sup>th</sup> August 2020]
4. HSE/HPSC. *Guiding principles for Infection Prevention and Control when returning to routine General Practice during pandemic v2.1*. [Internet] Dublin: Health Protection Surveillance Centre; 10 July 2020. Available from: <https://www.hpsc.ie/a-z/respiratory/coronavirus/novelcoronavirus/guidance/primarycareguidance/adviseriskassessmentandmanagementofpatients/Guiding%20principles%20IPC%20GP.pdf> [Accessed 24<sup>th</sup> August 2020]
  5. Patel MS, Phillips CB, Pearce C, Kljakovic M, Dugdale P, Glasgow N. General practice and pandemic influenza: a framework for planning and comparison of plans in five countries. *PLoS One* 2008 May 28;3(5):e2269.
  6. Kunin M, Engelhard D, Thomas S, Ashworth M, Piterman L. Challenges of the Pandemic Response in Primary Care during Pre-Vaccination Period: A Qualitative Study. *Isr.J.Health.Policy.Res.* 2015 Oct 15;4:32-015-0028-5. eCollection 2015.
  7. WHO. *2019 Novel Coronavirus (2019-nCoV): Strategic Preparedness and Response Plan*. [Internet] Geneva: World Health Organisation; 2020 [Draft as of 3 February 2020]. Available from: <https://www.who.int/docs/default-source/coronaviruse/srp-04022020.pdf?ua=1> [Accessed 24<sup>th</sup> August 2020]
  8. European Centre for Disease Prevention and Control. *Infection prevention and control for COVID-19 in healthcare settings – Fourth update*. [Internet] 3 July 2020. ECDC: Stockholm; 2020. Available from: <https://www.ecdc.europa.eu/en/publications-data/infection-prevention-and-control-and-preparedness-covid-19-healthcare-settings> [Accessed 25<sup>th</sup> August 2020]
  9. NPHE. *National Public Health Emergency Team (NPHE) COVID-19 Subgroup : Guidance and Evidence Synthesis*. [Internet] Dublin: Department of Health; 6 May 2020 [Last updated 4 August 2020]. Available from: <https://www.gov.ie/en/collection/07d750-nphet-covid-19-subgroup-guidance-and-evidence-synthesis/> [Accessed 25<sup>th</sup> August 2020]
  10. HSE. *Primary Care Reimbursement Service Statistical Analysis of Claims and Payments 2019*. [Internet] Dublin: Health Care Executive Primary Reimbursement Service; 2020. Available from: <https://www.hse.ie/eng/staff/pdrs/pdrs-publications/annual-report-2019.pdf> [Accessed 25<sup>th</sup> August 2020]
  11. Committee on the Future of Healthcare. *Sláintecare Report*. [Internet] Dublin: Houses of the Oireachtas; May 2017. Available from: <https://www.gov.ie/pdf/?file=https://assets.gov.ie/165/270718095030-1134389-Slaintecare-Report-May-2017.pdf#page=1> [Accessed 25<sup>th</sup> August 2020]
  12. Crosbie B, O'Callaghan ME, O'Flanagan S, Brennan D, Keane G, Behan W. A real-time measurement of general practice workload in the Republic of Ireland: a prospective study. *Br.J.Gen.Pract.* 2020 Jun 25;70(696):e489-e496.
  13. Department of Health. *Health Service Capacity Review 2018 Executive Report: Review of Health Demand and Capacity Requirement in Ireland to 2031 – Findings and Recommendations*. London: PA Knowledge Limited; 2018. Available from: <https://assets.gov.ie/10131/5bb5ff12463345bbac465aaf02a2333d.pdf> [Accessed 25<sup>th</sup> August 2020]
  14. Liu Y, Wang Z, Ren J, Tian Y, Zhou M, Zhou T, et al. A COVID-19 Risk Assessment Decision Support System for General Practitioners: Design and Development Study. *J.Med.Internet Res.* 2020 Jun 29;22(6):e19786.

15. Verhoeven V, Tsakitzidis G, Philips H, Van Royen P. Impact of the COVID-19 pandemic on the core functions of primary care: will the cure be worse than the disease? A qualitative interview study in Flemish GPs. *BMJ Open* 2020 Jun 17;10(6):e039674-2020-039674.
16. Thompson S. Patients who regularly see doctors are not doing so for fear of COVID-19. *Irish Times*. [Internet] April 4<sup>th</sup> 2020. Available from: <https://www.irishtimes.com/life-and-style/health-family/patients-who-regularly-see-doctors-are-not-doing-so-for-fear-of-covid-19-1.4217859> [Accessed 25th August 2020]
17. Government of Ireland. *Health in Ireland: Key Trends 2019*. [Internet] Dublin: Department of Health; 2019. Available from: <https://www.gov.ie/en/publication/f1bb64-health-in-ireland-key-trends-2019/> [Accessed 25<sup>th</sup> August 2020]
18. CSO. *CSO Statistical Release: Population and Migration Estimates*. [Internet] Cork: Central Statistics Office; April 2019. Available from: <https://www.cso.ie/en/releasesandpublications/er/pme/populationandmigrationestimate/sapril2019/> [Accessed 25<sup>th</sup> August 2020]
19. HSE. *Medical Workforce Planning: Future Demand for General Practitioners 2015-2025*. [Internet] Dublin: National Doctor Training and Planning, HR Directorate, Health Service Executive; September 2015. Available from: <https://www.hse.ie/eng/staff/leadership-education-development/met/plan/gp-medical-workforce-planning-report-sept-2015.pdf> [Accessed 25th August 2020]
20. Smith S, Walsh B, Wren M, Barron S, Morgenroth E, Eighan J, et al. *Geographic profile of healthcare needs and non-acute healthcare supply in Ireland*. ESRI Research Series: 90. [Internet] Dublin: The Economic and Social Research Institute; July 22 2019. Available from: [https://www.esri.ie/system/files/publications/RS90\\_0.pdf](https://www.esri.ie/system/files/publications/RS90_0.pdf) [Accessed 28th August 2020]
21. The Health Foundation. *How might COVID-19 affected people's ability to see their GP? COVID-19 Chart Series*. [Internet] London: The Health Foundation; 1 May 2020. Available from: <https://www.health.org.uk/news-and-comment/charts-and-infographics/how-might-covid-19-have-affected-peoples-ability-to-see-gp> [Accessed 25th August 2020]
22. NHS. Letter to: Chief executives of all NHS trusts and foundation trusts; CCG Accountable Officers; GP practices and Primary Care Networks; Providers of community health services; NHS 111 providers. *IMPORTANT - FOR ACTION - SECOND PHASE OF NHS RESPONSE TO COVID19*. From the Chief Executive Sir Simon Stevens & Chief Operating Officer Amanda Pritchard. [Internet] London: NHS; 29 April 2020. Available from: <https://www.england.nhs.uk/coronavirus/wp-content/uploads/sites/52/2020/04/second-phase-of-nhs-response-to-covid-19-letter-to-chief-execs-29-april-2020.pdf> [Accessed 25th August 2020]
23. Munoz MA, Lopez-Grau M. Lessons learned from the approach to the COVID-19 pandemic in urban primary health care centres in Barcelona, Spain. *Eur.J.Gen.Pract.* 2020 Dec;26(1):106-107.
24. RCGP. *General practice in the post Covid world: Challenges and opportunities for general practice*. [Internet] London: Royal College of General Practitioners; 2020. Available from: <https://www.rcgp.org.uk/-/media/Files/News/2020/general-practice-post-covid-rcgp.ashx?la=en> [Accessed 25<sup>th</sup> August 2020]
25. Rubin R. COVID-19's Crushing Effects on Medical Practices, Some of Which Might Not Survive. *JAMA* 2020 Jun 18.
26. Nelson F. Half of GP Clinics losing more than 30% of Revenue: Survey. *Medical Republic*. [Internet] 3 April 2020. Available from: <http://medicalrepublic.com.au/half-gp-clinics-losing-more-than-30-of-revenue-survey/26948> [Accessed 25th August 2020]



- 1
  - 2
  - 3
  - 4
  - 5
  - 6
  - 7
  - 8
  - 9
  - 10
  - 11
  - 12
  - 13
  - 14
  - 15
  - 16
  - 17
  - 18
  - 19
  - 20
  - 21
  - 22
  - 23
  - 24
  - 25
  - 26
  - 27
  - 28
  - 29
  - 30
  - 31
  - 32
  - 33
  - 34
  - 35
  - 36
  - 37
  - 38
  - 39
  - 40
  - 41
  - 42
  - 43
  - 44
  - 45
  - 46
  - 47
  - 48
  - 49
  - 50
  - 51
  - 52
  - 53
  - 54
  - 55
  - 56
  - 57
  - 58
  - 59
  - 60
27. de Sutter A, Llor C, Maier M, Mallen C, Tatsioni A, van Weert H, et al. Family medicine in times of 'COVID-19': A generalists' voice. *Eur.J.Gen.Pract.* 2020 Dec;26(1):58-60.
28. Bostock N. Millions of patients 'avoiding calls to GP' during COVID-19 pandemic. *GP Online*. [Internet] 25 April 2020. <https://www.gponline.com/millions-patients-avoiding-calls-gp-during-covid-19-pandemic/article/1681384> [Accessed 25th August 2020]
29. Marshall M, Howe A, Howsam G, Mulholland M, Leach J. COVID-19: a danger and an opportunity for the future of general practice. *Br.J.Gen.Pract.* 2020 May 28;70(695):270-271.
30. RACGP. *Implementation guidelines for video consultations in general practice: A telehealth initiative*. 3<sup>rd</sup> Edition. [Internet] East Melbourne Victoria: The Royal Australian College of General Practitioners; September 2012. Available from: <https://www.racgp.org.au/download/Documents/Telehealth/videoconsultguidelinesv3.pdf> [Accessed 25th August 2020]
31. Mulholland P, Cahill N. Has Covid-19 hastened the age of telemedicine? *Medical Independent*. [Internet] 10 April 2020. Available from: <https://www.medicalindependent.ie/has-covid-19-hastened-the-age-of-telemedicine/> [Accessed 25<sup>th</sup> August 2020]
32. HSE/Department of Health. *eHealth Strategy for Ireland*. [Internet] Dublin: Department of Health; 2013. Available from: <https://www.gov.ie/en/publication/6b7909-ehealth-strategy-for-ireland/> [Accessed 25<sup>th</sup> August 2020]
33. Gilligan P, Bennett A, Houlihan A, Padki A, Owen N, Morris D, et al. The Doctor Can See You Now: A Key Stakeholder Study Into The Acceptability Of Ambulance Based Telemedicine. *Ir.Med.J.* 2018 Jun 7;111(6):769.
34. Thornton J. Covid-19: how coronavirus will change the face of general practice forever. *BMJ* 2020 Mar 30;368:m1279.
35. Cullen P. Coronavirus: Patients asked to visit GP surgery only if they have an appointment. *Irish Times*. [Internet] 10 March 2020. Available from: <https://www.irishtimes.com/news/health/coronavirus-patients-asked-to-visit-gp-surgery-only-if-they-have-an-appointment-1.4198571> [Accessed 25th August 2020]
36. Campbell JL, Fletcher E, Britten N, Green C, Holt TA, Lattimer V, et al. Telephone triage for management of same-day consultation requests in general practice (the ESTEEM trial): a cluster-randomised controlled trial and cost-consequence analysis. *Lancet* 2014 Nov 22;384(9957):1859-1868.
37. HSE. *Coronavirus: Get urgent medical help for non-coronavirus symptoms*. [Internet] 5 June 2020. Available from: <https://www2.hse.ie/conditions/coronavirus/get-urgent-medical-help-for-non-coronavirus-symptoms.html> [Accessed 25th August 2020]

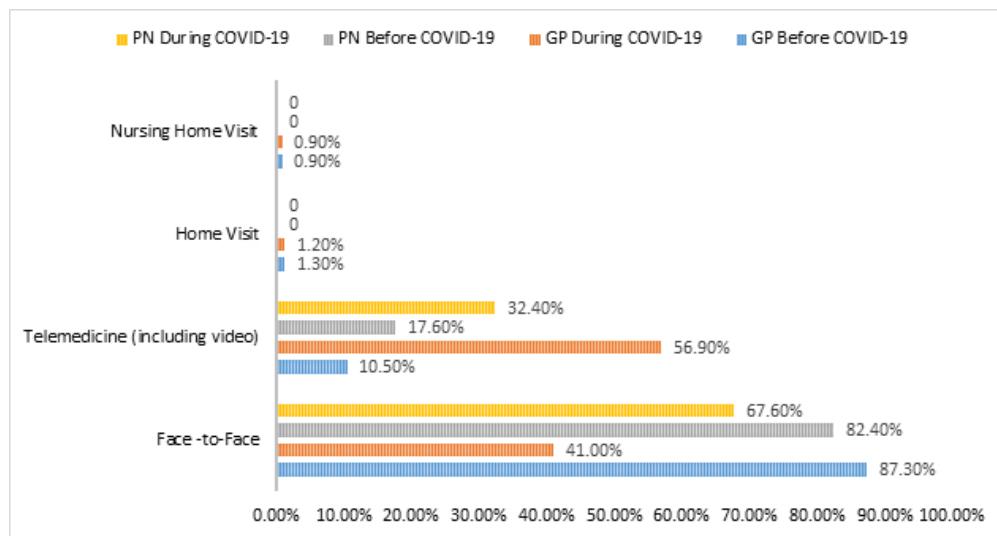

Figure 1 General Practitioner and Practice Nurse Consultations Before and During COVID-19

167x88mm (96 x 96 DPI)

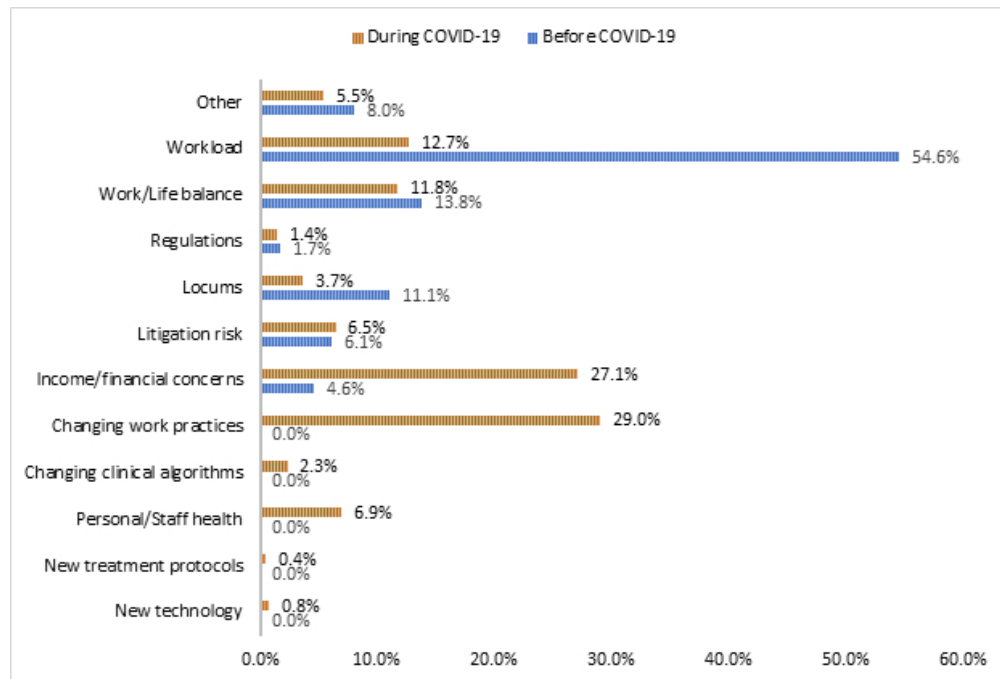

Most significant stressors for GPS

164x111mm (96 x 96 DPI)

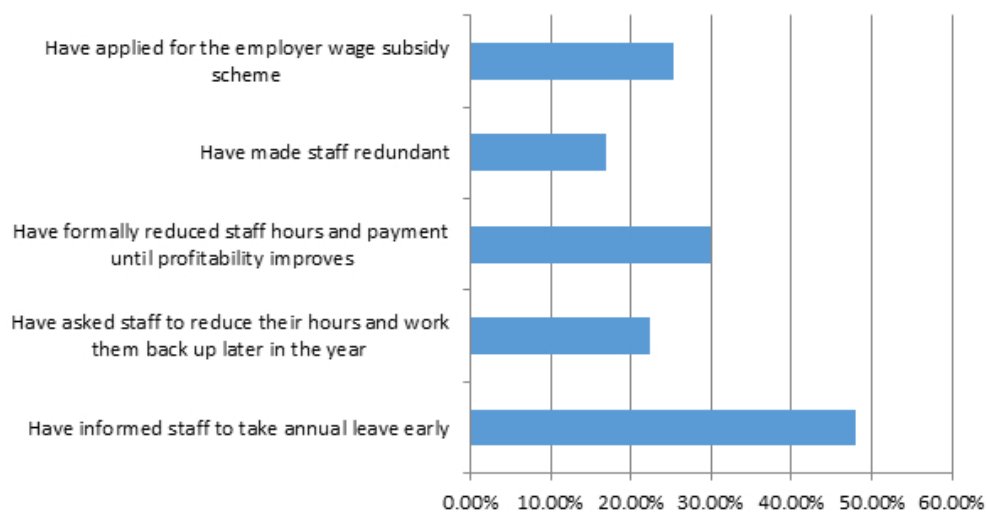

Measures implemented by practices to alleviate financial concerns

156x82mm (96 x 96 DPI)

1  
2  
3  
4  
5  
6  
7  
8  
9  
10  
11  
12  
13  
14  
15  
16  
17  
18  
19  
20  
21  
22  
23  
24  
25  
26  
27  
28  
29  
30  
31  
32  
33  
34  
35  
36  
37  
38  
39  
40  
41  
42  
43  
44  
45  
46  
47  
48  
49  
50  
51  
52  
53  
54  
55  
56  
57  
58  
59  
60

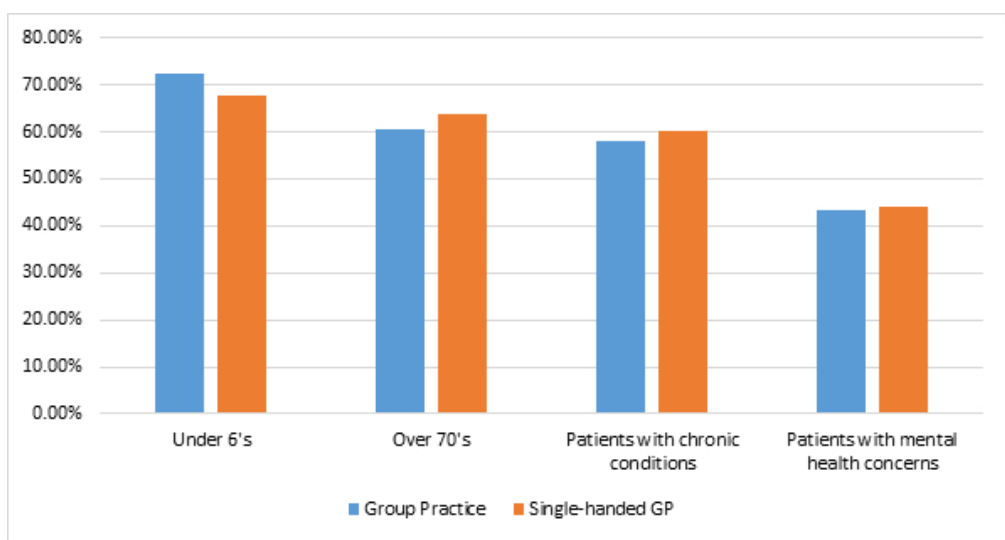

Reported decline in non-COVID-19 visits from patient groups by practice type

157x83mm (96 x 96 DPI)

## STROBE Statement—checklist of items that should be included in reports of observational studies

|                              | Item No | Recommendation                                                                                                                                                                                                                                                                                                                                                                                                                                                         | Page No |
|------------------------------|---------|------------------------------------------------------------------------------------------------------------------------------------------------------------------------------------------------------------------------------------------------------------------------------------------------------------------------------------------------------------------------------------------------------------------------------------------------------------------------|---------|
| <b>Title and abstract</b>    | 1       | (a) Indicate the study's design with a commonly used term in the title or the abstract                                                                                                                                                                                                                                                                                                                                                                                 | 1       |
|                              |         | (b) Provide in the abstract an informative and balanced summary of what was done and what was found                                                                                                                                                                                                                                                                                                                                                                    | 2       |
| <b>Introduction</b>          |         |                                                                                                                                                                                                                                                                                                                                                                                                                                                                        |         |
| Background/rationale         | 2       | Explain the scientific background and rationale for the investigation being reported                                                                                                                                                                                                                                                                                                                                                                                   | 3       |
| Objectives                   | 3       | State specific objectives, including any prespecified hypotheses                                                                                                                                                                                                                                                                                                                                                                                                       | 3       |
| <b>Methods</b>               |         |                                                                                                                                                                                                                                                                                                                                                                                                                                                                        |         |
| Study design                 | 4       | Present key elements of study design early in the paper                                                                                                                                                                                                                                                                                                                                                                                                                | 3       |
| Setting                      | 5       | Describe the setting, locations, and relevant dates, including periods of recruitment, exposure, follow-up, and data collection                                                                                                                                                                                                                                                                                                                                        | 4       |
| Participants                 | 6       | (a) <i>Cohort study</i> —Give the eligibility criteria, and the sources and methods of selection of participants. Describe methods of follow-up<br><i>Case-control study</i> —Give the eligibility criteria, and the sources and methods of case ascertainment and control selection. Give the rationale for the choice of cases and controls<br><i>Cross-sectional study</i> —Give the eligibility criteria, and the sources and methods of selection of participants | 4       |
|                              |         | (b) <i>Cohort study</i> —For matched studies, give matching criteria and number of exposed and unexposed<br><i>Case-control study</i> —For matched studies, give matching criteria and the number of controls per case                                                                                                                                                                                                                                                 | 4       |
| Variables                    | 7       | Clearly define all outcomes, exposures, predictors, potential confounders, and effect modifiers. Give diagnostic criteria, if applicable                                                                                                                                                                                                                                                                                                                               | 4       |
| Data sources/<br>measurement | 8*      | For each variable of interest, give sources of data and details of methods of assessment (measurement). Describe comparability of assessment methods if there is more than one group                                                                                                                                                                                                                                                                                   | 4       |
| Bias                         | 9       | Describe any efforts to address potential sources of bias                                                                                                                                                                                                                                                                                                                                                                                                              | 8       |
| Study size                   | 10      | Explain how the study size was arrived at                                                                                                                                                                                                                                                                                                                                                                                                                              | 4       |
| Quantitative variables       | 11      | Explain how quantitative variables were handled in the analyses. If applicable, describe which groupings were chosen and why                                                                                                                                                                                                                                                                                                                                           | 4       |
| Statistical methods          | 12      | (a) Describe all statistical methods, including those used to control for confounding                                                                                                                                                                                                                                                                                                                                                                                  | 4       |
|                              |         | (b) Describe any methods used to examine subgroups and interactions                                                                                                                                                                                                                                                                                                                                                                                                    | 4       |
|                              |         | (c) Explain how missing data were addressed                                                                                                                                                                                                                                                                                                                                                                                                                            | 4       |
|                              |         | (d) <i>Cohort study</i> —If applicable, explain how loss to follow-up was addressed<br><i>Case-control study</i> —If applicable, explain how matching of cases and controls was addressed<br><i>Cross-sectional study</i> —If applicable, describe analytical methods taking account of sampling strategy                                                                                                                                                              | 4       |
|                              |         | (e) Describe any sensitivity analyses                                                                                                                                                                                                                                                                                                                                                                                                                                  | 4       |

Continued on next page

1  
2  
3  
4  
5  
6  
7  
8  
9  
10  
11  
12  
13  
14  
15  
16  
17  
18  
19  
20  
21  
22  
23  
24  
25  
26  
27  
28  
29  
30  
31  
32  
33  
34  
35  
36  
37  
38  
39  
40  
41  
42  
43  
44  
45  
46  
47  
48  
49  
50  
51  
52  
53  
54  
55  
56  
57  
58  
59  
60

| <b>Results</b>           |     |                                                                                                                                                                                                              |      |
|--------------------------|-----|--------------------------------------------------------------------------------------------------------------------------------------------------------------------------------------------------------------|------|
| Participants             | 13* | (a) Report numbers of individuals at each stage of study—eg numbers potentially eligible, examined for eligibility, confirmed eligible, included in the study, completing follow-up, and analysed            | 4    |
|                          |     | (b) Give reasons for non-participation at each stage                                                                                                                                                         | n/a  |
|                          |     | (c) Consider use of a flow diagram                                                                                                                                                                           | n/a  |
| Descriptive data         | 14* | (a) Give characteristics of study participants (eg demographic, clinical, social) and information on exposures and potential confounders                                                                     | 4    |
|                          |     | (b) Indicate number of participants with missing data for each variable of interest                                                                                                                          | 4-8  |
|                          |     | (c) <i>Cohort study</i> —Summarise follow-up time (eg, average and total amount)                                                                                                                             |      |
| Outcome data             | 15* | <i>Cohort study</i> —Report numbers of outcome events or summary measures over time                                                                                                                          | 4-8  |
|                          |     | <i>Case-control study</i> —Report numbers in each exposure category, or summary measures of exposure                                                                                                         |      |
|                          |     | <i>Cross-sectional study</i> —Report numbers of outcome events or summary measures                                                                                                                           |      |
| Main results             | 16  | (a) Give unadjusted estimates and, if applicable, confounder-adjusted estimates and their precision (eg, 95% confidence interval). Make clear which confounders were adjusted for and why they were included | 4-8  |
|                          |     | (b) Report category boundaries when continuous variables were categorized                                                                                                                                    |      |
|                          |     | (c) If relevant, consider translating estimates of relative risk into absolute risk for a meaningful time period                                                                                             |      |
| Other analyses           | 17  | Report other analyses done—eg analyses of subgroups and interactions, and sensitivity analyses                                                                                                               | 4-8  |
| <b>Discussion</b>        |     |                                                                                                                                                                                                              |      |
| Key results              | 18  | Summarise key results with reference to study objectives                                                                                                                                                     | 8    |
| Limitations              | 19  | Discuss limitations of the study, taking into account sources of potential bias or imprecision. Discuss both direction and magnitude of any potential bias                                                   | 8-9  |
| Interpretation           | 20  | Give a cautious overall interpretation of results considering objectives, limitations, multiplicity of analyses, results from similar studies, and other relevant evidence                                   | 9-10 |
| Generalisability         | 21  | Discuss the generalisability (external validity) of the study results                                                                                                                                        | 10   |
| <b>Other information</b> |     |                                                                                                                                                                                                              |      |
| Funding                  | 22  | Give the source of funding and the role of the funders for the present study and, if applicable, for the original study on which the present article is based                                                | 12   |

\*Give information separately for cases and controls in case-control studies and, if applicable, for exposed and unexposed groups in cohort and cross-sectional studies.

**Note:** An Explanation and Elaboration article discusses each checklist item and gives methodological background and published examples of transparent reporting. The STROBE checklist is best used in conjunction with this article (freely available on the Web sites of PLoS Medicine at <http://www.plosmedicine.org/>, Annals of Internal Medicine at <http://www.annals.org/>, and Epidemiology at <http://www.epidem.com/>). Information on the STROBE Initiative is available at [www.strobe-statement.org](http://www.strobe-statement.org).

# BMJ Open

## How COVID-19 has affected general practice consultations and income – General Practitioner population survey evidence from Ireland

|                                 |                                                                                                                                                       |
|---------------------------------|-------------------------------------------------------------------------------------------------------------------------------------------------------|
| Journal:                        | <i>BMJ Open</i>                                                                                                                                       |
| Manuscript ID                   | bmjopen-2020-044685.R1                                                                                                                                |
| Article Type:                   | Original research                                                                                                                                     |
| Date Submitted by the Author:   | 08-Dec-2020                                                                                                                                           |
| Complete List of Authors:       | Homeniuk, Robyn; Irish College of General Practitioners, Research and Innovation<br>Collins, Claire; Irish College of General Practitioners, Research |
| <b>Primary Subject Heading</b>: | General practice / Family practice                                                                                                                    |
| Secondary Subject Heading:      | Health services research                                                                                                                              |
| Keywords:                       | Telemedicine < BIOTECHNOLOGY & BIOINFORMATICS, COVID-19, PRIMARY CARE                                                                                 |
|                                 |                                                                                                                                                       |

SCHOLARONE™  
Manuscripts





I, the Submitting Author has the right to grant and does grant on behalf of all authors of the Work (as defined in the below author licence), an exclusive licence and/or a non-exclusive licence for contributions from authors who are: i) UK Crown employees; ii) where BMJ has agreed a CC-BY licence shall apply, and/or iii) in accordance with the terms applicable for US Federal Government officers or employees acting as part of their official duties; on a worldwide, perpetual, irrevocable, royalty-free basis to BMJ Publishing Group Ltd ("BMJ") its licensees and where the relevant Journal is co-owned by BMJ to the co-owners of the Journal, to publish the Work in this journal and any other BMJ products and to exploit all rights, as set out in our [licence](#).

The Submitting Author accepts and understands that any supply made under these terms is made by BMJ to the Submitting Author unless you are acting as an employee on behalf of your employer or a postgraduate student of an affiliated institution which is paying any applicable article publishing charge ("APC") for Open Access articles. Where the Submitting Author wishes to make the Work available on an Open Access basis (and intends to pay the relevant APC), the terms of reuse of such Open Access shall be governed by a Creative Commons licence – details of these licences and which [Creative Commons](#) licence will apply to this Work are set out in our licence referred to above.

Other than as permitted in any relevant BMJ Author's Self Archiving Policies, I confirm this Work has not been accepted for publication elsewhere, is not being considered for publication elsewhere and does not duplicate material already published. I confirm all authors consent to publication of this Work and authorise the granting of this licence.

## How COVID-19 has affected general practice consultations and income – General Practitioner population survey evidence from Ireland

Robyn Homeniuk<sup>a</sup> and Claire Collins<sup>b</sup>

- a. Research Officer, Department of Research, Irish College of General Practitioners, 4-5 Lincoln Place, Dublin D2. Email: robyn.homeniuk@icgp.ie
- b. Director of Research and Innovation, Department of Research, Irish College of General Practitioners, 4-5 Lincoln Place, Dublin D2. Email: claire.collins@icgp.ie

For peer review only

## Abstract

### *Objectives*

How general practice is delivered in many countries has drastically changed due to the COVID-19 pandemic. This study aimed to answer the question of how general practice has changed in Ireland in response to COVID-19.

### *Design*

The Irish College of General Practitioners surveyed its membership before and after the global pandemic hit Ireland using an online survey instrument to capture consultation rates and mode of delivery.

### *Setting*

This study focuses on primary care, specifically general practice, in Ireland.

### *Participants*

A total of 527 general practices across Ireland submitted responses to the survey in February 2020 before the global pandemic; 532 general practices responded to a survey during the pandemic in June 2020. This covers 32% practices in Ireland.

### *Main outcome measures*

The type of consultations by general practitioners and practice nurses in both surveys is the main outcome measure used in this study. Other changes such as the perceived change in attendance by certain patient groups and practice income is also reported.

### *Results*

The proportion of telemedicine general practitioner consultations significantly ( $p < 0.01$ ) increased from 10.6% (CI 95% 10.3%, 10.9%) to 57.0% (CI 95% 56.4%, 57.6%). The majority of practices (80.2%) reported reduced practice profit. A statistically significant relationship was found between practice size and estimated percentage change in profit ( $p < 0.01$ ) showing that smaller practices reported higher estimated profit loss. Respondents reported decline in non-COVID-19 related consultations among certain patient cohorts - 90.2% for children under six years old; 77.8% for patients over 70 years.

### *Conclusions*

It is clear that the way general practice is delivered will not return to as before and that increased telemedicine is likely. However, it is necessary to assess the impact of this shift on patient health and to assess healthcare provider and patient experience to ensure continued high-quality care and patient safety.

### *Strengths and Limitations*

- **A key strength of this study is the large number of general practitioners who engaged with the surveys. It was possible to survey a third of all practices in Ireland at both time points.**
- **One of the weaknesses of the study is that the survey was self-selecting, which could have biased the responses in some cases. Furthermore, it was not possible to identify practices and match their responses from the first to the second survey.**

- We did not collect sociodemographic information, hence it was not possible to control for deprivation levels and other factors that may affect health care utilisation.
- Due to the large number of responding practices, we were able to get data covering every county in Ireland in both the pre-COVID-19 and during COVID-19 surveys. The volume of responses makes our findings more generalizable.

For peer review only

## Introduction

A cluster of 'atypical viral pneumonia' cases was diagnosed in Wuhan City, China in December 2019 [1]. By 9 January 2020, Chinese authorities found the cause of the outbreak was a novel coronavirus [2] – later named COVID-19. The WHO declared an international public health emergency [3] and by the end of February 2020, Ireland had its first case. National lockdown measures commenced in March 2020 and included recommendations for general practitioners (GPs) to observe physical distancing, wear personal protective equipment (PPE), and use telephone triage and appointments to reduce face-to-face appointments [4]. Epidemiologists globally have been monitoring the progression of this infection while governments have been developing and deploying emergency pandemic responses. The need to have global and national emergency management plans is well-documented [3] since the outbreak of SARS in 2003. Previous outbreaks have proven that contagious diseases can put intense pressure on health systems, especially on general practice, as it is the frontline of the medical response [5]. GPs have expressed their past uncertainty about how to respond to a pandemic [5]. Indeed, in response to the H1N1 pandemic, primary care staff struggled with implementing new workflows [6]. In Ireland, comprehensive preparedness plans are in place for handling public health emergencies. These plans follow WHO [7] and ECDC [8] guidance and are coordinated by the National Public Health Emergency Team [9].

General practitioners (GPs in Ireland operate as private professionals charging patients not covered under the public system a fee per visit. The State pays GPs on a capitation basis for patients covered under the public system. Around 43% of Irish people qualify for free healthcare access either through the public system known as the General Medical Services (GMS) card (32.4%) or a GP only card (10.4%); the remainder pay privately for GP visits [10]. GPs are critical for managing the increasing amount of chronic illnesses such as heart diseases, diabetes, and asthma – 80% of all visits to the GP are for chronic care management [11]. In 2015, the first step towards universal healthcare in Ireland was taken when children under 6 years old and adults over 70 years old became eligible for free GP care [11]. Patients in the latter group accounted for 25% of GP consultations and 31% of practice nurse visits in 2016 [12]. Before the start of this pandemic, general practitioners faced a heavy workload managing the majority of care needs [11], completing more than 25 consultations daily and additional time spent on administration lead to GPs working nearly 10 hours in a day [13]. The need to move more care into the community is the central point of the current healthcare strategy in Ireland [14]. Another key point in the reform strategy is to achieve universal healthcare by expanding current entitlements and move to a preventative care model [11].

With the onset of COVID-19, the face of general practice in Ireland, as in many countries, drastically changed, with developing clinical models [15] and consultation strategies having an impact on primary care [16]. GPs quickly noticed a decrease in the number of appointments being scheduled by patients while practice costs increased and income decreased [17]. Continuity of routine care might be at risk because of the pandemic, and the general health of the population is a key concern for primary care [16]. This paper reports on the changes experienced and in particular, those in consultation delivery methods in Irish general practice during the COVID-19 pandemic. At the beginning of February 2020, the ICGP surveyed its membership before the global pandemic reached Irish shores. In June 2020, the ICGP again surveyed its membership regarding the impact of COVID-19 on general practice.

## Methods

1  
2  
3 In early 2020, the Irish College of General Practitioners (ICGP) – the professional body for GPs in  
4 Ireland - designed an online survey to capture practice activities, stressors, and demographic details  
5 regarding general practices in Ireland. The survey was developed in order to measure general  
6 practice activity, as this information is not yet routine collected in Ireland. It was the intention to  
7 periodically repeat the survey with ICGP members to build a dataset to enable better resource  
8 planning in primary care, however, because of the COVID-19 pandemic, a decision was taken to  
9 adjust the survey accordingly.  
10  
11

12 It was distributed to 3,378 members both before (February 2020) and during (June 2020) the  
13 coronavirus pandemic. It was not sent to trainees, retired GPs, or Irish GPs working abroad. The  
14 second survey was updated to include additional questions and response categories that specifically  
15 related to the pandemic. Before each survey was sent out, eight GPs piloted the survey. A  
16 population survey approach was taken therefore; no additional sampling techniques were used. The  
17 survey sample was self-selecting, with the survey period open for a two-week period to ensure a  
18 significant number of responses was received.  
19  
20

21 The questionnaire was developed specifically for use in the survey. The questionnaire before the  
22 pandemic had 14 items, which covered the number of GPs and practice nurses, consultation activity  
23 and hours worked, stressors and practice demographic information. The questionnaire conducted  
24 during the pandemic had 25 items, as it gained new items pertaining to changes introduced because  
25 of COVID-19. Questions regarding stress, hours worked, appointment availability and pandemic  
26 response were included to obtain a better understand of the state of general practice.  
27  
28

29 There was no eligibility criteria to complete the survey. Only one survey for each practice was  
30 requested. Ethical approval from the ICGP Research Ethics Committee for both surveys was  
31 obtained and consent from practices for participation and data processing was confirmed at the  
32 start of each survey. The online survey was fully anonymous and no IP addresses were collected.  
33  
34

35 All data is based on survey responses. Consultation rates include face-to-face consultations,  
36 telephone and video consultations (referred to as telemedicine), home visits and visits to nursing  
37 homes reported by practices who responded to the survey. Data was returned regarding the most  
38 recent working day. Out of hours services in Ireland are provided and recorded separately and hence  
39 are not included in these figures. The definitions for city, town and village are based on Central  
40 Statistics Office [18] definitions - rural is an area where less than 1,500 people live, a town has a  
41 population between 1,500 and 49,999, and cities have a population >50,000.  
42  
43  
44

45 We conducted the analysis using SPSS V25 software, using descriptive analysis. For numerical data,  
46 means were used for comparisons and to conduct statistical tests as appropriate. A  $p$ -value of <0.05  
47 was used to indicate statistical significance. Chi-square tests were used for categorical comparisons.  
48 Pearson's and Spearman's tests were used to test for correlation between continuous variables. T-  
49 tests and F-tests were used to compare means as appropriate. Outliers were defined as those  
50 outside 1.5 times the interquartile range and were removed from calculations.  
51  
52

## 53 **Results**

### 54 *Survey Population*

55 There were 527 responses in the pre-COVID-19 survey- 32.2% of all 1,635 practices in Ireland [19]  
56 with 1,510.4 full time equivalent (FTE) GPs employed in these practices, 1,251.4 FTE GPs (82.9%) on  
57 duty on the day on which consultation data is based. In this sample, approximately one fifth (19.4%)  
58  
59  
60

of the practices were single-handed. The average number of FTE GPs at group practices was 3.3. At least one part-time practice nurse was employed at 93.6% (n=519) of practices with 632.33 FTE practice nurses overall and 84.5% of FTE practice nurses working on the day of data collection. On average, practices employed 1.2 FTE practice nurses, although 31.4% of practices employed between 0.20 and 0.90 FTE practice nurses.

City practices comprised 37.6% of the total, with 43.8% of practices located in towns and 18.6% in villages. There was at least one practice recorded in every county.

In the during COVID-19 survey, there were 532 responses, estimated at 32.5% of all practices in Ireland. A total of 1271.7 FTE GPs were employed in these practices with 1104.9 FTE GPs (86.9%), working on the day on which consultation numbers were recorded. There were slightly more single-handed practices in this sample at just over a quarter (28.4%). Group practices employed an average of 3.0 FTE GPs.

A practice nurse was employed by 89.8 % (n=521) of the practices with a total of 605.4 FTE practice nurses overall. On the day clinical activity was recorded, 509.0 FTE practice nurses (n=511) were available, which means 84.1% of the employed nurses were working.

City practices comprised 34.5 % of the total, with 45.8% of practices located in towns and 19.8% in villages and at least one practice responding in every county. Practice characteristics from both surveys are shown in Table 1.

**Table 1: Practice Characteristics**

|                                                   | Pre-<br>COVID-<br>19 | S.E. of mean or lower and<br>upper bounds (%) | During<br>COVID-<br>19 | S.E. of mean or lower and<br>upper bounds (%) |
|---------------------------------------------------|----------------------|-----------------------------------------------|------------------------|-----------------------------------------------|
| Total Number of practices                         | 527                  |                                               | 532                    |                                               |
| Number of Single-Handed Practices                 | 102                  |                                               | 151                    |                                               |
| Number of Group Practices                         | 425                  |                                               | 382                    |                                               |
| Number of FTE GPs Overall                         | 1510.4<br>(n=527)    |                                               | 1271.7<br>(n=532)      |                                               |
| Mean GPs overall                                  | 2.9                  | 0.1                                           | 2.4                    | 0.07                                          |
| Number of FTE GPs on the Day                      | 1251.4<br>(n=537)    |                                               | 1104.9<br>(n=532)      |                                               |
| Mean GPs on day                                   | 2.40                 | 0.06                                          | 2.1                    | 0.06                                          |
| Percent of Practices with at least a part-time PN | 93.6%<br>(n=519)     | 91.2%, 95.6%                                  | 89.8%<br>(n=521)       | 86.9%, 92.3%                                  |
| Number of FTE PNs Overall                         | 632.3<br>(n=519)     |                                               | 605.4<br>(n=521)       |                                               |
| Mean PNs overall                                  | 1.2                  | 0.05                                          | 1.2                    | 0.05                                          |

|                                |               |              |               |              |
|--------------------------------|---------------|--------------|---------------|--------------|
| Number of FTE PNs on the day   | 534.3 (n=515) |              | 509.0 (n=511) |              |
| Mean PNs on day                | 1.0           | 0.03         | 1             | 0.05         |
| Practices located in a City    | 37.6%         | 33.4%, 41.9% | 34.5%         | 30.4%, 38.7% |
| Practices located in a Town    | 43.8%         | 39.6%, 48.2% | 45.8%         | 41.5%, 50.1% |
| Practices Located in a village | 18.6%         | 15.4%, 22.2% | 19.8%         | 16.5%, 23.4% |
| <i>95% confidence interval</i> |               |              |               |              |

In both cases, practices received the questionnaire via email and an additional reminder email. The number of practices that provided valid responses defined as providing information for overall and on the day data, was comparable. There were an additional five responses during COVID-19; the geographic spread of the practices was similar though there was a small increase in single-handed practices responding however, this did not have a significant impact when comparing consultation methods.

#### *Consultations*

In the survey pre-COVID-19 87.2% (95% CI 86.9%, 87.6%) of appointments occurred face-to-face, 10.6% (95% CI 10.3%, 10.9%) were telemedicine and the remainder were visits to homes and nursing homes.

During COVID-19, the mode of consultation changed significantly. Over half of the GP consultations occurred via telemedicine (57.0%, 95% CI 56.4%, 57.6%); and 40.9% (95% CI 40.3%, 41.5%) occurred face-to-face with the remaining visits to homes or nursing homes. In Table 2 the proportion of consultation by each consultation method for GPs and practice nurses at each time point are shown.

**Table 2: Summary of Consultations**

| Consultation Method                                           | Pre COVID-19 Percent of Consultations | Lower and Upper bounds (%) | During COVID-19 Percent of Consultations | Lower and Upper bounds (%) |
|---------------------------------------------------------------|---------------------------------------|----------------------------|------------------------------------------|----------------------------|
| GP Face-to-Face                                               | 87.2%                                 | 86.9%, 87.6%               | 40.9%                                    | 40.3%, 41.5%               |
| GP Telemedicine (including video, telephone and other remote) | 10.6%                                 | 10.3%, 10.9%               | 57.0%                                    | 56.4%, 57.6%               |
| GP home visits                                                | 1.3%                                  | 1.2%, 1.4%                 | 1.2%                                     | 1.0%, 1.3%                 |
| GP nursing home visits                                        | 0.9%                                  | 0.8%, 1.0%                 | 0.9%                                     | 0.8%, 1.0%                 |
| PN Face-to-Face                                               | 82.3%                                 | 81.7%, 82.9%               | 67.6%                                    | 66.6%, 68.6%               |
| PN Telemedicine (including video, telephone and other remote) | 17.7%                                 | 17.1%, 18.3%               | 32.4%                                    | 31.4%, 33.4%               |
| <i>95% confidence interval</i>                                |                                       |                            |                                          |                            |



Face-to-face appointments decreased from 87.2% to 40.9% of all GP consultations and consultations by telemedicine increased from 10.6% to 57.0% of reported consultations.

Pre-COVID-19, 17.7% (95% CI 17.1%, 18.3%) or practice nurse consultation were via telemedicine and 82.3 % were face-to-face (95% CI 81.7%, 82.9%). During the pandemic, consultations via telemedicine made up 32.4% (95% CI 31.4%, 33.4%) and the rest were conducted face to face (67.6%; 95% CI 66.6%, 68.6%).

Before the pandemic began, practice nurses had a higher proportion of telemedicine appointments than GPs – 17.7% of practice nurse appointments in February 2020 compared to only 10.6% of GP appointments. During COVID-19 57.0% of GP, appointments were via telemedicine compared to 32.4% of practice nurse appointments.

Respondents were asked if they had noticed a decline in certain patient groups. Overall, there was a reported decline in non-COVID-19 related consultations. Almost all practices - 90.2% (CI 95% 87.7%, 92.8%) - noticed a decline for children under six years old and 77.8% (95% CI 74.3%, 81.4%) saw a decline for patients over 70 years (two patient groups with free GP care). A total of 74.1% (95% CI 70.3%, 77.8%) of practices reported a reduction in non-COVID-19 visits from people with chronic conditions, and 55.1% (95% CI 50.8%, 59.3%) reported a decline in visits from people with mental health concerns. Table 3 shows the decline in non-COVID-19 related consultations from each of these patient groups at group and single-handed practices.

**Table 3: Decline in non-COVID-19 consultations by key patient groups and practice type.**

|                                                                                                                                                                                                                                                                                                                                                                                                                                                                        | Single-Handed Practices Percentage (n=151) | Group Practices Percentage (n=381) |
|------------------------------------------------------------------------------------------------------------------------------------------------------------------------------------------------------------------------------------------------------------------------------------------------------------------------------------------------------------------------------------------------------------------------------------------------------------------------|--------------------------------------------|------------------------------------|
| Children under 6 years old                                                                                                                                                                                                                                                                                                                                                                                                                                             | 85.4% (79.8%, 91.1%)                       | 92.5% (89.4%, 94.8%)               |
| Adults over 70                                                                                                                                                                                                                                                                                                                                                                                                                                                         | 80.1% (73.8%, 86.5%)                       | 76.9% (72.7%, 81.1%)               |
| People with Chronic Conditions                                                                                                                                                                                                                                                                                                                                                                                                                                         | 74.8% (67.9%, 81.8%)                       | 73.8% (69.3%, 78.2%)               |
| People with mental health concerns                                                                                                                                                                                                                                                                                                                                                                                                                                     | 55.0% (47.0%, 62.9%)                       | 55.1 % (50.1%, 60.1%)              |
| <p>* Percentages were calculated as the number of responses for each practice type with a 95% confidence interval. The total number of responses for this question was 465 (90.5%, 87.6%, 92.9%).</p> <p>** Patients under 6 years old and over 70 years old receive free GP care, as do some patients with chronic conditions and mental health concerns. They are known to use GP services more frequently, which is why these specific groups were asked about.</p> |                                            |                                    |

#### *Practice income impact*

Overall, 80.2% (95% CI 76.8%, 83.6%) of practices (n=530) reported a decrease in profitability during the pandemic, although only half of the practices had gone undertaken a formal review of their accounts. Across all practice sizes, there is an expected average decrease in profitability of 34.8%

and an average of 17.0% for an increase in profitability. Only 20 (3.8%, 95% CI 2.2%, 5.4%) practices were expecting an increase in profitability.

More group practices completed formal account reviews assessing the change in practice income and profit - 54.9% (n=363) of group practices had done this compared to 31.1% (n=141) of single-handed practices. Single-handed practices were estimating an average loss of 38.6% (S.E. 1.7) of profits compared to the average estimate of 30.8% (S.E. 0.97) loss for group practices. The lower number of formal assessments by single-handed practices could explain part of this difference, through overestimates by GPs when completing the survey.

A small but statistically significant relationship between practice size and estimated percentage change in profit was found using a linear regression (R square = 0.04, p <0.01) showing that as practice size decreased the estimated percentage of profit loss increased.

To manage the financial impact of COVID-19, 308 (57.9%) of the practice had implemented changes to accommodate lost profit that occurred. The most popular measure was to ask staff to take their annual leave early.

There were no significant relationships between practice size and implementing the listed measures.

A total of 233 (43.8%, 95% CI 39.6%, 48.0%) practices indicated they had staff who were affected by redundancies, reduced hours or reduced salary. The most affected staff has been receptionists with 93 (17.5%, 95% CI 14.3%, 20.7%) practices selecting this option. Following that, 83 (15.6%, 95% CI 12.5%, 18.7%) practices had practice nurses who were affected and 81 (15.2%, 95% CI 12.2%, 18.3%) practices with salaried GPs were affected. Forty-six GPs left comments as well, most highlighting that they had been the one to reduce their personal salary for the sake of keeping their staff. Table 4 shows the proportion of practices that used the following methods to recover income during the pandemic.

**Table 4: Measures introduced to help the business manage the financial effects of COVID-19**

| Answer Choices                                                                                                                                                                                                 | Single-Handed Practice Percentage (n=151) | Group Practice Percentage (n=382) |
|----------------------------------------------------------------------------------------------------------------------------------------------------------------------------------------------------------------|-------------------------------------------|-----------------------------------|
| Have informed staff to take annual leave early                                                                                                                                                                 | 13.9% (8.4%, 19.4%)                       | 32.6% (27.8%, 37.3%)              |
| Have asked staff to reduce their hours and work them back up later in the year                                                                                                                                 | 8.0% (3.6%, 12.3%)                        | 14.4% (10.9%, 18.0%)              |
| Have formally reduced staff hours and payment until profitability improves                                                                                                                                     | 10.6% (5.7%, 15.5%)                       | 19.7% (15.7%, 23.7%)              |
| Have made staff redundant                                                                                                                                                                                      | 9.3% (4.7%, 13.9%)                        | 9.7% (6.7%, 12.7%)                |
| Have applied for the employer wage subsidy scheme                                                                                                                                                              | 9.9% (5.2%, 14.7%)                        | 16.5% (12.8%, 20.3%)              |
| * Percentages calculated based on the total number of each practice type using 95% confidence intervals. 233 practices submitted responses to this question which us 45.3% (41.0%, 49.8%) of the total sample. |                                           |                                   |

## Discussion

### *Principal Findings*

A shift to telemedicine was observed from 10.6% of all GP consultations and 17.7% of practice nurse consultations pre-COVID-19 to 57.0% and 32.4% respectively during the COVID-19 response.

More than half of practices saw decreases in non-COVID-19 related consultations from vulnerable patient groups. Particularly, non-COVID-19 related visits from patients under 6 and over 70 – who receive free GP care – decreased despite usually being high users of health services.

Finally, practices' finances have been impacted, with 80.2% reporting reduced profit. Moreover, two-fifths of practices had staff affected by redundancy, reduced hours or reduced salary as a measure to offset the financial impact of the pandemic.

### *Strengths and weaknesses of the study*

Our surveys are based on a self-selecting sample for both surveys, which comes with inherent bias. The responding samples are different and we cannot do a direct practice-based comparison; however, key comparisons indicated that the samples were comparable. We did not collect information that would allow for meaningful geographical analyses, and therefore could not account for regional and socioeconomic differences, which could affect consultation methods. Data is based on reported data and not from data extracted from general practice systems and hence may lead to under- or over-reporting. Additionally, we did not collect patient population information so adjustment for disability could not be completed or compared nationally.

One of the key strengths in these surveys is the number of FTE GPs represented. In the pre-COVID-19 survey, there were 1510.4 FTE GPs represented, employed by the 527 responding practices. In the post-COVID-19 survey, 1271.7 (n=532) FTE GPs from the responding practices were represented. This means an estimated 32.2% and 32.5% respectively of practices in Ireland were captured in each survey. In addition, the representation of both single-handed and group practices was similar to national figures [20]. While complex geographical information was not collected, both samples have at least one practice in all part of the country with more in cities such as Dublin and Cork, which is consistent with the geographic spread of practices, previously reported [21].

### *Interpretation in terms of international literature/Strengths and weaknesses compared to other literature*

Since the beginning of the COVID-19 pandemic, there have been many changes rapidly implemented in healthcare across the world and they are having an impact on clinicians [16, 17]. Our study showed a decrease in GP appointments and overall in general practice (GPs and PRACTICE NURSES). This is similar to reports in the UK [22], where the NHS has noticed a 30% decrease in the number of GP appointments compared to the same time in 2019.

Our study shows a substantial shift from 12.4% of all consultations in general practice in Ireland delivered via telemedicine to 50.7%. The UK reports are varied; however, they show a similar shift to telemedicine consultations. With an overall 30% drop in all consultations, GPs reported consultations changing from 90-95% face-to-face to 85% remote [22, 23]. The current UK estimates are higher than ours; however, their telemedicine rate pre-COVID-19 was also higher [22]. Spain also

1  
2  
3 reports an increase in the use of virtual consultations, at 68.3% during the pandemic [24]. The  
4 proportion of face-to-face GP consultations decreased from 87.2% to 40.9% in our study, showing a  
5 similar reduction to England where proportions changed from 70% to 23% [25].  
6

7 The majority (80.2%) of our practices reported reduced practice profit, and this has been seen  
8 elsewhere with GPs in the United States of America turning to crowdfunding to help their practices,  
9 and GPs in Belgium and Australia also felt the effect of changing remuneration during COVID-19 [16,  
10 17, 26].  
11

12  
13 Similar studies comparing the impact of COVID-19 on practice consultations are rare. Much of the  
14 literature to date on delivery type changes are based on commentaries and not actual  
15 measurements [24, 27]. However, a handful of recent publications about the use of healthcare  
16 during the pandemic. A recent German study with 1,095 GPs and patients aged 65 or older, found  
17 that there was a 14% decrease in consultations in May 2020 compared to the same time last year,  
18 and the rate of diabetes, dementia, depression, cancer and stroke diagnoses decreased during  
19 lockdown (between -17% and -26%) [28]. In a survey of Australian GPs, 73% of practices had a  
20 reduction in bookings and 77% had a decrease in practice income meanwhile telephone calls (93%)  
21 and practice costs (81%) increase[17]. These results support our survey's findings that these  
22 challenges have also been experienced by GPs in Ireland. A key strength of this paper is that it adds  
23 to the knowledge base in terms of the potential impact of the COVID-19 pandemic on general  
24 practice in the current void of such literature.  
25  
26

### 27 28 *Implications for practice* 29

30 GPs are motivated by altruism to work during pandemics despite the high personal risk, and they are  
31 enthusiastic about further training and information [5]. However, despite preparedness planning,  
32 implementing pandemic policies faces multiple obstacles [5]. GPs are facing rapidly changing patient  
33 flows, clinical algorithms, new care pathways, and the need for new ways of delivering high-quality  
34 care [16, 17, 24, 27, 28, 29]. Irish GPs have implemented many changes during the COVID-19  
35 pandemic. The RACGP recommends 'a planned and coordinated approach' when implementing a  
36 telehealth service [30]; however, due to the urgent nature of the current situation, this has not been  
37 possible. Maintaining the quality of healthcare is important in sustaining a healthy workforce, which  
38 is essential to support a healthy economy during and after the pandemic.  
39

40  
41 Ireland, like many other countries, has taken massive steps towards the regular use of remote  
42 consultations, seemingly overnight, with previous trepidation regarding continuity of care and safety  
43 falling away out of necessity [16, 29]. The rapid national adoption of telemedicine consultations as  
44 well as electronic prescribing has presented opportunity; however, GPs are concerned that without  
45 as much face-to-face contact, critical non-verbal communication is missing from consultations and in  
46 some cases, telephone consults are insufficient to address patient concerns [16].  
47  
48

49 Ireland has two health strategies promoting the use of technology to enable patient-centred care  
50 nationally. Sláintecare, the current healthcare strategy in Ireland, aims to establish a national health  
51 fund that will help deliver universal healthcare and introduce comprehensive eHealth infrastructure  
52 [11]. This strategy supported the 2013 eHealth strategy, which had an objective of more affordable  
53 and more personalised care for all by capitalising on technology [31]. During the pandemic, practices  
54 across the country have swiftly transitioned to using technology such as a secure email facility  
55 between health care providers (Healthmail), e-prescribing, and telemedicine (video and telephone)  
56 consultations. Before the COVID-19 pandemic began, clinicians in primary care had used  
57 telemedicine interventions [29], but it was not the main form of care. Changes adopted during this  
58  
59  
60

1  
2  
3 pandemic accelerated the digitalisation of healthcare and trepidation regarding widespread  
4 adoption have fallen away out of necessity [29]. This could lead the way to lasting adoption of  
5 technology such as e-prescribing and telephone and video consultations after the pandemic.  
6

7  
8 Telemedicine has been viewed as a way to lower costs and see more patients [32, 33, 34] but was  
9 rare in Irish general practice up to now, and here, as elsewhere, there was some resistance and  
10 concern [16]. However, the current COVID-19 pandemic has resulted in telemedicine consultations  
11 being recommended for all GPs [4]. Recommendations like these made in response to the pandemic  
12 could bring about lasting changes to the health system [22]. Patients have adapted to telemedicine  
13 consultations being the standard method of consultation; previous studies found that patients found  
14 video consultations acceptable [32] but age (over 60) and computer proficiency were found to  
15 negatively impact a patient's acceptability [33, 34]. Telemedicine has been invaluable during the  
16 outbreak of COVID-19, as it has enabled routine care to continue to some degree however, patients  
17 who are digitally disadvantaged were found to be from populations already experiencing greater  
18 health risks - such as older people and those in lower socioeconomic classes [32, 34]. Going forward,  
19 special attention must be given to reducing health inequalities exasperated by recent changes in  
20 care.  
21  
22  
23  
24

25 Furthermore, a noted decrease in consultations for non-COVID related symptoms has been observed  
26 in our survey. Patients, who are most vulnerable, such as people over 65, have also been avoiding  
27 seeking care in other countries [16, 26, 28]. This could have serious impacts on health outcomes and  
28 patient safety with calls on patients not to self-diagnose or delay seeking treatment [16, 26, 28].  
29 Patients are also changing the way they use health services, with more emphasis on self-care [16, 24,  
30 28]. However, not all patients will have the same capacity for caring for their health without the level  
31 of support a GP or practice nurse can provide with face-to-face consultations. More research on  
32 patient and physician satisfaction and whether health outcomes are impacted by consultation types  
33 is needed to develop guidelines and policies on how frequently remote consultations can be used.  
34 Patient feedback will be invaluable for maintaining lasting benefits.  
35  
36

37  
38 The COVID-19 pandemic has the potential to change general practice forever, and this does not only  
39 apply in Ireland but has been noted elsewhere [15, 16, 17, 22, 24, 28]. The adoption of 'total triage'  
40 systems has been seen during this pandemic whereby GPs can decide the mode of follow-up  
41 consultation, whether that is face-to-face, video call or telephone. As we look to a post-COVID  
42 landscape, there is a case for general practice retaining this to allow more flexibility in how  
43 consultations are delivered according to the needs and preferences of patients. However, telephone  
44 triage does not reduce GP workload, so we need to evaluate the impacts on workload and patient-  
45 centred care [16, 32, 33, 34]. While it is unlikely that we will maintain this level of telemedicine  
46 consultations, it is expected that how general practice functions will not return to as it was before  
47 [29, 35].  
48  
49

50  
51 However, we should not lose sight of the relationship between the GP and patient and the  
52 importance of good communication and trust [16, 26, 27, 29, 32, 33]. Telemedicine does not work  
53 for all patients or health problems, and there is a need to establish what works best for different  
54 patients [16, 27, 32, 33, 34]. We need to evaluate the impact on patient experience, health  
55 inequalities and patient-centred care [33, 36].  
56

57  
58 Since the beginning of June 2020, renewed efforts have been made to reassure and encourage the  
59 public to continue seeking medical advice from their GPs by making an appointment [36].  
60

*Unanswered questions and future research*

1  
2  
3 How general practice is delivered will not return to as before; increased telemedicine is likely. It is  
4 necessary to assess the impact of this shift on patient health and to assess healthcare provider and  
5 patient experience to ensure continued high-quality care and patient safety. Furthermore, we need  
6 to understand the impact of changing work requirements and evolving consultation techniques on  
7 general practice workload and practice income and viability.  
8  
9

## 10 **DECLARATIONS**

### 11 *Abbreviations*

12 ECDC – European Centre for Disease Prevention and Control

13  
14 ESRI – Economic and Social Research Institute

15  
16 FTE – Full time equivalent

17  
18 GP - General Practitioner

19  
20 HSE - Health Service Executive

21  
22 ICGP - Irish College of General Practitioners

23  
24 NHS – National Health Service (UK)

25  
26 PN - Practice Nurse

27  
28 PPE – Personal protective equipment

29  
30 RACGP – Royal Australian College of General Practitioners

31  
32 WHO - World Health Organisation  
33  
34

### 35 **Copyright**

36  
37 The Corresponding Author has the right to grant on behalf of all authors and does grant on behalf of  
38 all authors, an exclusive licence (or non exclusive for government employees) on a worldwide basis  
39 to the BMJ Publishing Group Ltd to permit this article (if accepted) to be published in BMJ editions  
40 and any other BMJPGJL products and sublicences such use and exploit all subsidiary rights, as set out  
41 in our licence.  
42  
43  
44

### 45 ***Competing interests***

46 All authors have completed the *Unified Competing Interest form* (available on request from the  
47 corresponding author) and declare: no support from any organisation for the submitted work; no  
48 financial relationships with any organisations that might have an interest in the submitted work in  
49 the previous three years, no other relationships or activities that could appear to have influenced  
50 the submitted work.  
51  
52

### 53 ***Ethics approval and consent to participate***

54  
55 Ethical approval was obtained for the study from the Irish College of General Practitioners Research  
56 Ethics Committee.  
57

### 58 ***Public and patient involvement***

59 Patents and members of the public were not involved in this research because it was not relevant to  
60

1  
2  
3 the study questions. The study focused on changes experienced by general practitioners who were  
4 involved in the study design as members of the ICGP board.  
5

#### 6 **Consent for publication**

7  
8 Not applicable.  
9

#### 10 **Availability of data and materials**

11  
12  
13 The data is available on reasonable request to the corresponding author.  
14

#### 15 **Funding**

16 No funding was received for this work.  
17

#### 18 **Authors' contributions**

19 CC was the project principal investigator. She conceived the project idea, designed the  
20 questionnaire, undertook the data collection, supervised the data analysis and contributed to the  
21 paper.  
22

23  
24 RH was the project research assistant. She analysed the data, undertook the analysis and  
25 contributed to the paper.  
26

27 Both authors have read and approved the final paper.  
28

29 Name of guarantor: Claire Collins.  
30

#### 31 **Transparency declaration**

32  
33 The authors affirm that the manuscript is an honest, accurate, and transparent account of the study  
34 being reported; that no important aspects of the study have been omitted; and that any  
35 discrepancies from the study as planned (and, if relevant, registered) have been explained.  
36

#### 37 **Acknowledgements**

38 The authors wish to acknowledge the valuable contribution and time given by all participants.  
39  
40  
41  
42  
43  
44

#### 45 **References**

- 46 1. WHO Newsroom. *Timeline of WHO's response to COVID-19*. [Internet] Geneva: World  
47 Health Organisation; 29 June 2020 [updated 30 July 2020]. Available from:  
48 [https://www.who.int/china/news/detail/09-01-2020-who-statement-regarding-cluster-of-](https://www.who.int/china/news/detail/09-01-2020-who-statement-regarding-cluster-of-pneumonia-cases-in-wuhan-china)  
49 [pneumonia-cases-in-wuhan-china](https://www.who.int/china/news/detail/09-01-2020-who-statement-regarding-cluster-of-pneumonia-cases-in-wuhan-china) [Accessed 24<sup>th</sup> August 2020]
- 50 2. WHO. *WHO Statement regarding cluster of pneumonia cases in Wuhan, China*. [Internet]  
51 Geneva: World Health Organisation; 9 January 2020. Available from:  
52 [https://www.who.int/china/news/detail/09-01-2020-who-statement-regarding-cluster-of-](https://www.who.int/china/news/detail/09-01-2020-who-statement-regarding-cluster-of-pneumonia-cases-in-wuhan-china)  
53 [pneumonia-cases-in-wuhan-china](https://www.who.int/china/news/detail/09-01-2020-who-statement-regarding-cluster-of-pneumonia-cases-in-wuhan-china) [Accessed 24<sup>th</sup> August 2020]
- 54 3. WHO. *WHO Director-General's statement on IHR Emergency Committee on Novel*  
55 *Coronavirus (2019-nCoV)*. [Internet] Geneva: World Health Organisation; 30 January 2020.  
56 Available from: <https://www.who.int/dg/speeches/detail/who-director-general-s->  
57  
58  
59  
60

- 1  
2  
3 [statement-on-ihr-emergency-committee-on-novel-coronavirus-\(2019-ncov\)](#) [Accessed 24<sup>th</sup>  
4 August 2020]
- 5  
6 4. HSE/HPSC. *Guiding principles for Infection Prevention and Control when returning to*  
7 *routine General Practice during pandemic v2.1.* [Internet] Dublin: Health Protection  
8 Surveillance Centre; 10 July 2020. Available from: [https://www.hpsc.ie/a-](https://www.hpsc.ie/a-z/respiratory/coronavirus/novelcoronavirus/guidance/primarycareguidance/adviseriskassessmentandmanagementofpatients/Guiding%20principles%20IPC%20GP.pdf)  
9 [z/respiratory/coronavirus/novelcoronavirus/guidance/primarycareguidance/adviseriskass](https://www.hpsc.ie/a-z/respiratory/coronavirus/novelcoronavirus/guidance/primarycareguidance/adviseriskassessmentandmanagementofpatients/Guiding%20principles%20IPC%20GP.pdf)  
10 [essmentandmanagementofpatients/Guiding%20principles%20IPC%20GP.pdf](https://www.hpsc.ie/a-z/respiratory/coronavirus/novelcoronavirus/guidance/primarycareguidance/adviseriskassessmentandmanagementofpatients/Guiding%20principles%20IPC%20GP.pdf) [Accessed  
11 24<sup>th</sup> August 2020]
- 12  
13 5. Patel MS, Phillips CB, Pearce C, Kljakovic M, Dugdale P, Glasgow N. General practice and  
14 pandemic influenza: a framework for planning and comparison of plans in five countries.  
15 *PLoS One* 2008 May 28;3(5):e2269.
- 16  
17 6. Kunin M, Engelhard D, Thomas S, Ashworth M, Piterman L. Challenges of the Pandemic  
18 Response in Primary Care during Pre-Vaccination Period: A Qualitative Study.  
19 *Isr.J.Health.Policy.Res.* 2015 Oct 15;4:32-015-0028-5. eCollection 2015.
- 20  
21 7. WHO. *2019 Novel Coronavirus (2019-nCoV): Strategic Preparedness and Response Plan.*  
22 [Internet] Geneva: World Health Organisation; 2020 [Draft as of 3 February 2020].  
23 Available from: [https://www.who.int/docs/default-source/coronaviruse/srp-](https://www.who.int/docs/default-source/coronaviruse/srp-04022020.pdf?ua=1)  
24 [04022020.pdf?ua=1](https://www.who.int/docs/default-source/coronaviruse/srp-04022020.pdf?ua=1) [Accessed 24<sup>th</sup> August 2020]
- 25  
26 8. European Centre for Disease Prevention and Control. *Infection prevention and control for*  
27 *COVID-19 in healthcare settings – Fourth update.* [Internet] 3 July 2020. ECDC: Stockholm;  
28 2020. Available from: [https://www.ecdc.europa.eu/en/publications-data/infection-](https://www.ecdc.europa.eu/en/publications-data/infection-prevention-and-control-and-preparedness-covid-19-healthcare-settings)  
29 [prevention-and-control-and-preparedness-covid-19-healthcare-settings](https://www.ecdc.europa.eu/en/publications-data/infection-prevention-and-control-and-preparedness-covid-19-healthcare-settings) [Accessed 25<sup>th</sup>  
30 August 2020]
- 31  
32 9. NPHE. *National Public Health Emergency Team (NPHE) COVID-19 Subgroup : Guidance*  
33 *and Evidence Synthesis.* [Internet] Dublin: Department of Health; 6 May 2020 [Last  
34 updated 4 August 2020]. Available from: [https://www.gov.ie/en/collection/07d750-](https://www.gov.ie/en/collection/07d750-nphet-covid-19-subgroup-guidance-and-evidence-synthesis/)  
35 [nphet-covid-19-subgroup-guidance-and-evidence-synthesis/](https://www.gov.ie/en/collection/07d750-nphet-covid-19-subgroup-guidance-and-evidence-synthesis/) [Accessed 25<sup>th</sup> August 2020]
- 36  
37 10. HSE. *Primary Care Reimbursement Service Statistical Analysis of Claims and Payments*  
38 *2019.* [Internet] Dublin: Health Care Executive Primary Reimbursement Service; 2020.  
39 Available from: [https://www.hse.ie/eng/staff/pdrs/pdrs-publications/annual-report-](https://www.hse.ie/eng/staff/pdrs/pdrs-publications/annual-report-2019.pdf)  
40 [2019.pdf](https://www.hse.ie/eng/staff/pdrs/pdrs-publications/annual-report-2019.pdf) [Accessed 25<sup>th</sup> August 2020]
- 41  
42 11. Committee on the Future of Healthcare. *Sláintecare Report.* [Internet] Dublin: Houses of  
43 the Oireachtas; May 2017. Available from:  
44 [https://www.gov.ie/pdf/?file=https://assets.gov.ie/165/270718095030-1134389-](https://www.gov.ie/pdf/?file=https://assets.gov.ie/165/270718095030-1134389-Slaintecare-Report-May-2017.pdf#page=1)  
45 [Slaintecare-Report-May-2017.pdf#page=1](https://www.gov.ie/pdf/?file=https://assets.gov.ie/165/270718095030-1134389-Slaintecare-Report-May-2017.pdf#page=1) [Accessed 25<sup>th</sup> August 2020]
- 46  
47 12. Department of Health. *Sláintecare Action Plan 2019.* [Internet] Dublin: Department of  
48 Health; 2019. Available from:  
49 <https://assets.gov.ie/22606/4e13c790cf31463491c2e878212e3c29.pdf> [Accessed 28<sup>th</sup>  
50 August 2020]
- 51  
52 13. Crosbie B, O'Callaghan ME, O'Flanagan S, Brennan D, Keane G, Behan W. A real-time  
53 measurement of general practice workload in the Republic of Ireland: a prospective study.  
54 *Br.J.Gen.Pract.* 2020 Jun 25;70(696):e489-e496.
- 55  
56 14. Department of Health. *Health Service Capacity Review 2018 Executive Report: Review of*  
57 *Health Demand and Capacity Requirement in Ireland to 2031 – Findings and*  
58 *Recommendations.* London: PA Knowledge Limited; 2018. Available from:  
59 <https://assets.gov.ie/10131/5bb5ff12463345bbac465aaf02a2333d.pdf> [Accessed 25<sup>th</sup>  
60 August 2020]



15. Liu Y, Wang Z, Ren J, Tian Y, Zhou M, Zhou T, et al. A COVID-19 Risk Assessment Decision Support System for General Practitioners: Design and Development Study. *J.Med.Internet Res.* 2020 Jun 29;22(6):e19786.
16. Verhoeven V, Tsakitidis G, Philips H, Van Royen P. Impact of the COVID-19 pandemic on the core functions of primary care: will the cure be worse than the disease? A qualitative interview study in Flemish GPs. *BMJ Open* 2020 Jun 17;10(6):e039674-2020-039674.
17. Kippen R, O'Sullivan B, Hickson H, Leach M, Wallace G. A national survey of COVID-19 challenges, responses and effects in Australian general practice. *Aust J Gen Pract.* 2020 Nov;49(11):745-751. doi: 10.31128/AJGP-06-20-5465.
18. CSO. *CSO Statistical Release: Population and Migration Estimates*. [Internet] Cork: Central Statistics Office; April 2019. Available from: <https://www.cso.ie/en/releasesandpublications/er/pme/populationandmigrationestimate/sapril2019/> [Accessed 25<sup>th</sup> August 2020]
19. HSE. *Medical Workforce Planning: Future Demand for General Practitioners 2015-2025*. [Internet] Dublin: National Doctor Training and Planning, HR Directorate, Health Service Executive; September 2015. Available from: <https://www.hse.ie/eng/staff/leadership-education-development/met/plan/gp-medical-workforce-planning-report-sept-2015.pdf> [Accessed 25<sup>th</sup> August 2020]
20. O'Kelly M, Teljeur C, O'Kelly F, Ni Shulleabhain A, O'Dowd T. *Structure of General Practice in Ireland 1982 – 2015*. [Internet] Dublin: Trinity College Dublin/Irish College of General Practitioners; 2016. Available from: [https://www.tcd.ie/medicine/public\\_health\\_primary\\_care/assets/pdf/structure-of-general-practice-2016.pdf](https://www.tcd.ie/medicine/public_health_primary_care/assets/pdf/structure-of-general-practice-2016.pdf) [Accessed 28<sup>th</sup> August 2020]
21. Smith S, Walsh B, Wren M, Barron S, Morgenroth E, Eighan J, et al. *Geographic profile of healthcare needs and non-acute healthcare supply in Ireland*. ESRI Research Series: 90. [Internet] Dublin: The Economic and Social Research Institute; July 22 2019. Available from: [https://www.esri.ie/system/files/publications/RS90\\_0.pdf](https://www.esri.ie/system/files/publications/RS90_0.pdf) [Accessed 28<sup>th</sup> August 2020]
22. The Health Foundation. *How might COVID-19 affected people's ability to see their GP? COVID-19 Chart Series*. [Internet] London: The Health Foundation; 1 May 2020. Available from: <https://www.health.org.uk/news-and-comment/charts-and-infographics/how-might-covid-19-have-affected-peoples-ability-to-see-gp> [Accessed 25<sup>th</sup> August 2020]
23. NHS. Letter to: Chief executives of all NHS trusts and foundation trusts; CCG Accountable Officers; GP practices and Primary Care Networks; Providers of community health services; NHS 111 providers. *IMPORTANT - FOR ACTION - SECOND PHASE OF NHS RESPONSE TO COVID19*. From the Chief Executive Sir Simon Stevens & Chief Operating Officer Amanda Pritchard. [Internet] London: NHS; 29 April 2020. Available from: <https://www.england.nhs.uk/coronavirus/wp-content/uploads/sites/52/2020/04/second-phase-of-nhs-response-to-covid-19-letter-to-chief-execs-29-april-2020.pdf> [Accessed 25<sup>th</sup> August 2020]
24. Munoz MA, Lopez-Grau M. Lessons learned from the approach to the COVID-19 pandemic in urban primary health care centres in Barcelona, Spain. *Eur.J.Gen.Pract.* 2020 Dec;26(1):106-107.
25. RCGP. *General practice in the post Covid world: Challenges and opportunities for general practice*. [Internet] London: Royal College of General Practitioners; 2020. Available from: <https://www.rcgp.org.uk/-/media/Files/News/2020/general-practice-post-covid-rcgp.ashx?la=en> [Accessed 25<sup>th</sup> August 2020]

- 1  
2  
3  
4  
5  
6  
7  
8  
9  
10  
11  
12  
13  
14  
15  
16  
17  
18  
19  
20  
21  
22  
23  
24  
25  
26  
27  
28  
29  
30  
31  
32  
33  
34  
35  
36  
37  
38  
39  
40  
41  
42  
43  
44  
45  
46  
47  
48  
49  
50  
51  
52  
53  
54  
55  
56  
57  
58  
59  
60
26. Rubin R. COVID-19's Crushing Effects on Medical Practices, Some of Which Might Not Survive. *JAMA* 2020 Jun 18.
  27. de Sutter A, Llor C, Maier M, Mallen C, Tatsioni A, van Weert H, et al. Family medicine in times of 'COVID-19': A generalists' voice. *Eur.J.Gen.Pract.* 2020 Dec;26(1):58-60.
  28. Michalowsky B, Hoffmann W, Bohlken J, Kostev K. Effect of the COVID-19 Lockdown on Disease Recognition and Utilization of Healthcare Services in the Older Population in German: A Cross-sectional Study. *Age and Ageing*. 2020.
  29. Marshall M, Howe A, Howsam G, Mulholland M, Leach J. COVID-19: a danger and an opportunity for the future of general practice. *Br.J.Gen.Pract.* 2020 May 28;70(695):270-271.
  30. RACGP. *Implementation guidelines for video consultations in general practice: A telehealth initiative*. 3<sup>rd</sup> Edition. [Internet] East Melbourne Victoria: The Royal Australian College of General Practitioners; September 2012. Available from: <https://www.racgp.org.au/download/Documents/Telehealth/videoconsultguidelinesv3.pdf> [Accessed 25th August 2020]
  31. HSE/Department of Health. *eHealth Strategy for Ireland*. [Internet] Dublin: Department of Health; 2013. Available from: <https://www.gov.ie/en/publication/6b7909-ehealth-strategy-for-ireland/> [Accessed 25<sup>th</sup> August 2020]
  32. Thiyagarajan A, Grant C, Griffiths F, Atherton H. Exploring patients' and clinicians' experiences of video consultations in primary care: a systematic scoping review. *BJGP open*. 2020;4(1).
  33. Johnston S, MacDougall M, McKinstry B. The use of video consulting in general practice: semi-structured interviews examining acceptability to patients. *BMJ Health & Care Informatics* 2016;23:doi: 10.14236/jhi.v23i2.141
  34. Gilligan P, Bennett A, Houlihan A, Padki A, Owen N, Morris D, et al. The Doctor Can See You Now: A Key Stakeholder Study Into The Acceptability Of Ambulance Based Telemedicine. *Ir.Med.J.* 2018 Jun 7;111(6):769.
  35. Thornton J. Covid-19: how coronavirus will change the face of general practice forever. *BMJ* 2020 Mar 30;368:m1279.
  36. HSE. *Coronavirus: Get urgent medical help for non-coronavirus symptoms*. [Internet] 5 June 2020. Available from: <https://www2.hse.ie/conditions/coronavirus/get-urgent-medical-help-for-non-coronavirus-symptoms.html> [Accessed 25th August 2020]

## STROBE Statement—checklist of items that should be included in reports of observational studies

|                              | Item No | Recommendation                                                                                                                                                                                                                                                                                                                                                                                                                                                         | Page No |
|------------------------------|---------|------------------------------------------------------------------------------------------------------------------------------------------------------------------------------------------------------------------------------------------------------------------------------------------------------------------------------------------------------------------------------------------------------------------------------------------------------------------------|---------|
| <b>Title and abstract</b>    | 1       | (a) Indicate the study's design with a commonly used term in the title or the abstract                                                                                                                                                                                                                                                                                                                                                                                 | 1       |
|                              |         | (b) Provide in the abstract an informative and balanced summary of what was done and what was found                                                                                                                                                                                                                                                                                                                                                                    | 2       |
| <b>Introduction</b>          |         |                                                                                                                                                                                                                                                                                                                                                                                                                                                                        |         |
| Background/rationale         | 2       | Explain the scientific background and rationale for the investigation being reported                                                                                                                                                                                                                                                                                                                                                                                   | 4       |
| Objectives                   | 3       | State specific objectives, including any prespecified hypotheses                                                                                                                                                                                                                                                                                                                                                                                                       | 4       |
| <b>Methods</b>               |         |                                                                                                                                                                                                                                                                                                                                                                                                                                                                        |         |
| Study design                 | 4       | Present key elements of study design early in the paper                                                                                                                                                                                                                                                                                                                                                                                                                | 5       |
| Setting                      | 5       | Describe the setting, locations, and relevant dates, including periods of recruitment, exposure, follow-up, and data collection                                                                                                                                                                                                                                                                                                                                        | 5       |
| Participants                 | 6       | (a) <i>Cohort study</i> —Give the eligibility criteria, and the sources and methods of selection of participants. Describe methods of follow-up<br><i>Case-control study</i> —Give the eligibility criteria, and the sources and methods of case ascertainment and control selection. Give the rationale for the choice of cases and controls<br><i>Cross-sectional study</i> —Give the eligibility criteria, and the sources and methods of selection of participants | 5       |
|                              |         | (b) <i>Cohort study</i> —For matched studies, give matching criteria and number of exposed and unexposed<br><i>Case-control study</i> —For matched studies, give matching criteria and the number of controls per case                                                                                                                                                                                                                                                 | 5       |
| Variables                    | 7       | Clearly define all outcomes, exposures, predictors, potential confounders, and effect modifiers. Give diagnostic criteria, if applicable                                                                                                                                                                                                                                                                                                                               | 5       |
| Data sources/<br>measurement | 8*      | For each variable of interest, give sources of data and details of methods of assessment (measurement). Describe comparability of assessment methods if there is more than one group                                                                                                                                                                                                                                                                                   | 5       |
| Bias                         | 9       | Describe any efforts to address potential sources of bias                                                                                                                                                                                                                                                                                                                                                                                                              | 5       |
| Study size                   | 10      | Explain how the study size was arrived at                                                                                                                                                                                                                                                                                                                                                                                                                              | 4-6     |
| Quantitative variables       | 11      | Explain how quantitative variables were handled in the analyses. If applicable, describe which groupings were chosen and why                                                                                                                                                                                                                                                                                                                                           | 5       |
| Statistical methods          | 12      | (a) Describe all statistical methods, including those used to control for confounding                                                                                                                                                                                                                                                                                                                                                                                  | 5       |
|                              |         | (b) Describe any methods used to examine subgroups and interactions                                                                                                                                                                                                                                                                                                                                                                                                    | 5       |
|                              |         | (c) Explain how missing data were addressed                                                                                                                                                                                                                                                                                                                                                                                                                            | 5       |
|                              | 5       | (d) <i>Cohort study</i> —If applicable, explain how loss to follow-up was addressed<br><i>Case-control study</i> —If applicable, explain how matching of cases and controls was addressed<br><i>Cross-sectional study</i> —If applicable, describe analytical methods taking account of sampling strategy                                                                                                                                                              | 5       |
|                              |         | (e) Describe any sensitivity analyses                                                                                                                                                                                                                                                                                                                                                                                                                                  | 5       |

Continued on next page

| <b>Results</b>           |     |                                                                                                                                                                                                              |       |
|--------------------------|-----|--------------------------------------------------------------------------------------------------------------------------------------------------------------------------------------------------------------|-------|
| Participants             | 13* | (a) Report numbers of individuals at each stage of study—eg numbers potentially eligible, examined for eligibility, confirmed eligible, included in the study, completing follow-up, and analysed            | 5-6   |
|                          |     | (b) Give reasons for non-participation at each stage                                                                                                                                                         | n/a   |
|                          |     | (c) Consider use of a flow diagram                                                                                                                                                                           | n/a   |
| Descriptive data         | 14* | (a) Give characteristics of study participants (eg demographic, clinical, social) and information on exposures and potential confounders                                                                     | 5-6   |
|                          |     | (b) Indicate number of participants with missing data for each variable of interest                                                                                                                          | 5-9   |
|                          |     | (c) <i>Cohort study</i> —Summarise follow-up time (eg, average and total amount)                                                                                                                             | 7     |
| Outcome data             | 15* | <i>Cohort study</i> —Report numbers of outcome events or summary measures over time                                                                                                                          | 4-8   |
|                          |     | <i>Case-control study</i> —Report numbers in each exposure category, or summary measures of exposure                                                                                                         |       |
|                          |     | <i>Cross-sectional study</i> —Report numbers of outcome events or summary measures                                                                                                                           |       |
| Main results             | 16  | (a) Give unadjusted estimates and, if applicable, confounder-adjusted estimates and their precision (eg, 95% confidence interval). Make clear which confounders were adjusted for and why they were included | 5-9   |
|                          |     | (b) Report category boundaries when continuous variables were categorized                                                                                                                                    |       |
|                          |     | (c) If relevant, consider translating estimates of relative risk into absolute risk for a meaningful time period                                                                                             |       |
| Other analyses           | 17  | Report other analyses done—eg analyses of subgroups and interactions, and sensitivity analyses                                                                                                               | 5-9   |
| <b>Discussion</b>        |     |                                                                                                                                                                                                              |       |
| Key results              | 18  | Summarise key results with reference to study objectives                                                                                                                                                     | 10    |
| Limitations              | 19  | Discuss limitations of the study, taking into account sources of potential bias or imprecision. Discuss both direction and magnitude of any potential bias                                                   | 10    |
| Interpretation           | 20  | Give a cautious overall interpretation of results considering objectives, limitations, multiplicity of analyses, results from similar studies, and other relevant evidence                                   | 10-11 |
| Generalisability         | 21  | Discuss the generalisability (external validity) of the study results                                                                                                                                        | 11-12 |
| <b>Other information</b> |     |                                                                                                                                                                                                              |       |
| Funding                  | 22  | Give the source of funding and the role of the funders for the present study and, if applicable, for the original study on which the present article is based                                                | 14    |

\*Give information separately for cases and controls in case-control studies and, if applicable, for exposed and unexposed groups in cohort and cross-sectional studies.

**Note:** An Explanation and Elaboration article discusses each checklist item and gives methodological background and published examples of transparent reporting. The STROBE checklist is best used in conjunction with this article (freely available on the Web sites of PLoS Medicine at <http://www.plosmedicine.org/>, Annals of Internal Medicine at <http://www.annals.org/>, and Epidemiology at <http://www.epidem.com/>). Information on the STROBE Initiative is available at [www.strobe-statement.org](http://www.strobe-statement.org).

# BMJ Open

## How COVID-19 has affected general practice consultations and income – General Practitioner cross-sectional population survey evidence from Ireland

|                                 |                                                                                                                                                       |
|---------------------------------|-------------------------------------------------------------------------------------------------------------------------------------------------------|
| Journal:                        | <i>BMJ Open</i>                                                                                                                                       |
| Manuscript ID                   | bmjopen-2020-044685.R2                                                                                                                                |
| Article Type:                   | Original research                                                                                                                                     |
| Date Submitted by the Author:   | 08-Feb-2021                                                                                                                                           |
| Complete List of Authors:       | Homeniuk, Robyn; Irish College of General Practitioners, Research and Innovation<br>Collins, Claire; Irish College of General Practitioners, Research |
| <b>Primary Subject Heading</b>: | General practice / Family practice                                                                                                                    |
| Secondary Subject Heading:      | Health services research                                                                                                                              |
| Keywords:                       | Telemedicine < BIOTECHNOLOGY & BIOINFORMATICS, COVID-19, PRIMARY CARE                                                                                 |
|                                 |                                                                                                                                                       |

SCHOLARONE™  
Manuscripts



I, the Submitting Author has the right to grant and does grant on behalf of all authors of the Work (as defined in the below author licence), an exclusive licence and/or a non-exclusive licence for contributions from authors who are: i) UK Crown employees; ii) where BMJ has agreed a CC-BY licence shall apply, and/or iii) in accordance with the terms applicable for US Federal Government officers or employees acting as part of their official duties; on a worldwide, perpetual, irrevocable, royalty-free basis to BMJ Publishing Group Ltd ("BMJ") its licensees and where the relevant Journal is co-owned by BMJ to the co-owners of the Journal, to publish the Work in this journal and any other BMJ products and to exploit all rights, as set out in our [licence](#).

The Submitting Author accepts and understands that any supply made under these terms is made by BMJ to the Submitting Author unless you are acting as an employee on behalf of your employer or a postgraduate student of an affiliated institution which is paying any applicable article publishing charge ("APC") for Open Access articles. Where the Submitting Author wishes to make the Work available on an Open Access basis (and intends to pay the relevant APC), the terms of reuse of such Open Access shall be governed by a Creative Commons licence – details of these licences and which [Creative Commons](#) licence will apply to this Work are set out in our licence referred to above.

Other than as permitted in any relevant BMJ Author's Self Archiving Policies, I confirm this Work has not been accepted for publication elsewhere, is not being considered for publication elsewhere and does not duplicate material already published. I confirm all authors consent to publication of this Work and authorise the granting of this licence.

1  
2  
3  
4  
5  
6  
7  
8  
9  
10  
11  
12  
13  
14  
15  
16  
17  
18  
19  
20  
21  
22  
23  
24  
25  
26  
27  
28  
29  
30  
31  
32  
33  
34  
35  
36  
37  
38  
39  
40  
41  
42  
43  
44  
45  
46  
47  
48  
49  
50  
51  
52  
53  
54  
55  
56  
57  
58  
59  
60

## How COVID-19 has affected general practice consultations and income – General Practitioner cross-sectional population survey evidence from Ireland

Robyn Homeniuk<sup>a</sup> and Claire Collins<sup>b</sup>

- a. Research Officer, Department of Research, Irish College of General Practitioners, 4-5 Lincoln Place, Dublin D2. Email: robyn.homeniuk@icgp.ie
- b. Director of Research and Innovation, Department of Research, Irish College of General Practitioners, 4-5 Lincoln Place, Dublin D2. Email: claire.collins@icgp.ie

For peer review only

## Abstract

### **Objectives**

How general practice is delivered in many countries has drastically changed due to the COVID-19 pandemic. This study aimed to answer the question of how general practice has changed in Ireland in response to COVID-19.

### **Design**

The Irish College of General Practitioners surveyed its membership before and after the global pandemic hit Ireland using a cross-sectional online survey instrument to capture consultation rates and mode of delivery.

### **Setting**

This study focuses on primary care, specifically general practice, in Ireland.

### **Participants**

526 general practices across Ireland submitted responses to the survey in February 2020 before the global pandemic; 538 general practices responded to the second survey during the pandemic in June 2020. This covers 32% and 33% of practices in Ireland, respectively.

### **Main outcome measures**

The type of consultations by general practitioners and practice nurses in both surveys is the main outcome measure used in this study. Other changes such as the perceived change in attendance by certain patient groups and practice income are also reported.

### **Results**

Face-to-face consultations decreased from a median of 26 IQR (21.3, 30) to a median of 8 (6, 13) during – a significant drop ( $p<0.001$ ). Whilst GP telemedicine consultations increased ( $p<0.001$ ) median of 2.4 IQR (0, 5.33) to a median of 11.33 IQR (6, 19). The majority of practices (80.0%) reported reduced practice profit. Respondents reported decline in non-COVID-19 related consultations among certain patient cohorts – 90.0% for children under six years old; 77.7% for patients over 70 years.

### **Conclusions**

It is likely that the way general practice is delivered will not return to as before and that increased telemedicine can be expected. However, it is necessary to assess the impact of this shift on patient health and to assess healthcare provider and patient experience to ensure continued high-quality care and patient safety.

### **Strengths and Limitations**

- **A key strength of this study is the large number of general practitioners who engaged with the surveys. It was possible to survey a third of all practices in Ireland at both time points.**
- **Due to the large number of responding practices, we were able to get data covering every county in Ireland in both the pre-COVID-19 and during COVID-19 surveys. The volume of responses makes our findings more generalizable.**



- 1  
2  
3  
4  
5  
6  
7  
8  
9  
10  
11  
12  
13  
14  
15  
16  
17  
18  
19  
20  
21  
22  
23  
24  
25  
26  
27  
28  
29  
30  
31  
32  
33  
34  
35  
36  
37  
38  
39  
40  
41  
42  
43  
44  
45  
46  
47  
48  
49  
50  
51  
52  
53  
54  
55  
56  
57  
58  
59  
60
- **The timing of the survey was another key strength of the study, as we were able to capture clinical activity data before COVID-19 change and then rapidly collect information after the initial wave of the pandemic.**
  - **One of the weaknesses of the study is that design used a self-selecting cross-sectional survey, which could have biased the responses in some cases. It was not possible to identify practices and match their responses from the first to the second survey for direct comparison nor was it possible to determine casual relationships.**
  - **Another weakness was that we did not collect sociodemographic information, hence it was not possible to control for deprivation levels and other factors that may affect health care utilisation.**

For peer review only

## Introduction

A cluster of 'atypical viral pneumonia' cases were diagnosed in Wuhan City, China in December 2019 [1]. By 9 January 2020, Chinese authorities found the cause of the outbreak was a novel coronavirus [2] – later named COVID-19. The WHO declared an international public health emergency [3] and by the end of February 2020, Ireland had its first case. National lockdown measures commenced in March 2020 and recommended that general practitioners (GPs) observe physical distancing, wear personal protective equipment (PPE), and use telephone triage and appointments to reduce face-to-face contact [4]. Epidemiologists globally have been monitoring the progression of this infection while governments have been developing and deploying emergency pandemic responses. The need to have global and national emergency management plans has been well-documented [3] since the outbreak of SARS in 2003. Previous outbreaks have proven that contagious diseases can put intense pressure on health systems, especially on general practice, as it is the frontline of the medical response [5]. GPs have expressed their past uncertainty about how to respond to a pandemic [5]. Indeed, in response to the H1N1 pandemic, primary care staff struggled with implementing new workflows [6]. In Ireland, comprehensive preparedness plans are in place for handling public health emergencies. These plans follow WHO [7] and ECDC [8] guidance and are coordinated by the National Public Health Emergency Team [9].

General practitioners in Ireland operate as private professionals charging patients not covered under the public system a fee per visit. The State pays GPs on a capitation basis for patients covered under the public system. Around 43% of Irish people qualify for free healthcare access either through the public system known as the General Medical Services (GMS) card (32.4%) or a GP-visit only card (10.4%); the remainder pay privately for GP visits [10]. GPs are critical to managing the increasing amount of chronic illnesses such as heart diseases, diabetes, and asthma – 80% of all visits to the GP are for chronic care management [11]. In 2015, the first step towards universal healthcare in Ireland was taken when children under 6 years old and adults over 70 years old became eligible for free GP care [11]. Patients in the latter group accounted for 25% of GP consultations and 31% of practice nurse visits in 2016 [12]. Before the start of this pandemic, general practitioners faced a heavy workload managing the majority of care needs [11], completing more than 25 consultations daily, and additional time spent on administration led to GPs working nearly 10 hours in a day [13]. The need to move more care into the community is the central point of the current healthcare strategy in Ireland [14]. Another key point in the reform strategy is to achieve universal healthcare by expanding current entitlements and moving to a preventative care model [11].

With the onset of COVID-19, the face of general practice in Ireland, as in many countries, drastically changed, with developing clinical models [15] and new consultation strategies having an impact on primary care [16]. GPs quickly noticed a decrease in the number of appointments scheduled by patients, while practice costs increased and income decreased [17]. Continuity of routine care might be at risk because of the pandemic, and the general health of the population is a key concern for primary care [16]. This paper reports on the changes experienced, particularly those in consultation delivery methods, in Irish general practice during the COVID-19 pandemic. At the beginning of February 2020, the ICGP surveyed its membership before the global pandemic reached Irish shores. In June 2020, the ICGP again surveyed its membership regarding the impact of COVID-19 on general practice.

## Methods

1  
2  
3 In early 2020, the Irish College of General Practitioners (ICGP) – the professional body for GPs in  
4 Ireland - designed an online survey to capture practice activities, stressors, and demographic details  
5 regarding general practices in Ireland. The survey was developed in order to measure general  
6 practice activity, as this information is not yet routinely collected in Ireland. It was the intention to  
7 periodically repeat the survey with ICGP members to build a dataset to enable better resource  
8 planning in primary care; however, because of the COVID-19 pandemic, a decision was taken to  
9 adjust the survey accordingly.  
10  
11

12 It was distributed to 3,378 members both before (February 2020) and during (June 2020) the  
13 coronavirus pandemic. It was not sent to trainees, retired GPs, or Irish GPs working abroad. The  
14 second survey was updated to include additional questions and response categories that specifically  
15 related to the pandemic. Before each survey was sent out, eight GPs piloted the survey. A  
16 population survey approach was taken; therefore, no additional sampling techniques were used.  
17 The survey sample was self-selecting, with the survey open for a two-week period to ensure a  
18 significant number of responses were received.  
19  
20

21 The questionnaire was developed specifically for use in the survey. The questionnaire before the  
22 pandemic had 14 items, which covered the number of GPs and practice nurses, consultation activity  
23 and hours worked stressors and practice demographic information. The questionnaire conducted  
24 during the pandemic had 25 items, as it gained new items pertaining to changes introduced because  
25 of COVID-19. The surveys have been included as supplemental materials 1 and 2 respectively.  
26 Questions regarding stress, hours worked, appointment availability and pandemic response were  
27 included to obtain a better understanding of the state of general practice.  
28  
29

30 There were no eligibility criteria to complete the survey. Only one survey for each practice was  
31 requested in order to obtain cross-sectional data from Irish general practice. Ethical approval from  
32 the ICGP Research Ethics Committee for both surveys was obtained and consent from practices for  
33 participation and data processing was confirmed at the start of each survey. The online survey was  
34 fully anonymous and no IP addresses were collected.  
35  
36

37 All data is based on survey responses. Consultation rates include face-to-face consultations,  
38 telephone and video consultations (referred to as telemedicine), home visits and visits to nursing  
39 homes reported by practices who responded to the survey. Data was returned regarding the most  
40 recent working day. Out of hours services in Ireland are provided and recorded separately and hence  
41 are not included in these figures. The definitions for city, town and village are based on Central  
42 Statistics Office [18] definitions - rural is an area where less than 1,500 people live, a town has a  
43 population between 1,500 and 49,999, and cities have a population 50,000 or more.  
44  
45

46 We conducted the analysis using SPSS V25 software, using descriptive analysis. For numerical data,  
47 means were used for comparisons and to conduct statistical tests as appropriate. A  $p$ -value of  $<0.05$   
48 was used to indicate statistical significance. Mann-Whitney U tests were used to compare the mean  
49 number of consultations per GP per day and Chi-square tests were used for categorical variables.  
50  
51

## 52 **Results**

### 53 *Survey Population*

54 There were 526 responses to the pre-COVID-19 survey- 32% of all 1,635 practices in Ireland [19]. Five  
55 hundred twenty-three practices responded to item 4, stating that 1,504.5 full time equivalent (FTE)  
56 GPs employed at these practices. In response to item 3, 526 practices reported a total of 1,253.9 FTE  
57 GPs (82.8%) on duty on the day on which consultation data is based. In this sample, approximately  
58  
59  
60

one fifth (19.4%) of the practices had 1.0 FTE GP or less employed - these are considered single-handed practices. The average number of FTE GPs at group practices was 3.3. At least one part-time practice nurse was employed at 483 practices (93.8% of 515 practices who responded to this question) of practices. A total of 629.5 FTE practice nurses were employed by these practices. On the day of data collection 535.8 FTE practice nurses (n=514, 447 practices with a nurse working) were working, with an average of 1.0 FTE per practice. On average, practices employed 1.2 FTE practice nurses – although 161 practices employed between 0.20 and 0.90 FTE practice nurses.

Item 12 asked where practices were located. City practices comprised 37.5% (197) of the total, with 43.9% (231) of practices located in towns and 18.6% (98) in villages. There was at least one practice recorded in every county of Ireland.

In the survey issued during the COVID-19 response, 783 practices responded; however, 240 participants only answered the first four items and five respondents did not consent for their responses to be used – ergo 538 valid responses were received. Hence, 32.9% of all practices in Ireland were represented in the during COVID-19 survey.

Item 4 asked for the total number of FTE GPs and practice nurse; 537 practices had a total of 1276.5 FTE GPs and 526 practices reported a total of 607.2 FTE nurses. Just 56 practices had no practice nurse employed, and 12 did not respond to this question. Item 20 asked for the number of FTE GPs and practice nurses working on the day where consultation numbers were recorded; 534 practices reported that 1104.9 FTE GPs were working with an average of 2.1 FTE GPs at working each practice (SE 0.06). 513 practices reported 509.0 FTE practice nurses were available, with an average of 1.0 working per practice.

There were slightly more single-handed practices in this sample at just over a quarter (29.0%). Group practices employed an average of 2.9 FTE GPs (SE 0.08).

Item 2 asked where practices were located; a total of 537 practices responded to this question. City practices comprised 34.4 % (185) of the total, with 46.0% (247) of practices located in towns and 19.5% (105) in villages and at least one practice responding in every county. Practice characteristics from both surveys are shown in Table 1.

**Table 1: Practice Characteristics**

|                                        | Pre-COVID-19         | During COVID-19     |
|----------------------------------------|----------------------|---------------------|
| Total Number of practices              | 526                  | 538                 |
| Number of Single-Handed Practices      | 101<br>(19.4%)       | 156<br>(29.0%)      |
| Number of Group Practices              | 422<br>(80.2%)       | 382<br>(71.0%)      |
| Number of FTE GPs Overall              | 1504.5 (n=523)       | 1276.5 (n=537)      |
| Mean GPs overall                       | 2.9 (SE 0.1)         | 2.4 (0.07)          |
| Number of FTE GPs on the Day           | 1253.9 (n=526)       | 1104.9 (n=534)      |
| Mean GPs on day                        | 2.40 (SE 0.06)       | 2.1 SE(0.06)        |
| Practices with at least a part-time PN | 483<br>93.8% (n=515) | 463<br>88.0%(n=526) |
| Number of FTE PNs Overall              | 629.5 (n=515)        | 607.2 (n=526)       |

|                                |               |               |
|--------------------------------|---------------|---------------|
| Mean PNs overall               | 1.2 (SE 0.05) | 1.2 (SE 0.05) |
| Number of FTE PNs on the day   | 534.3 (n=515) | 509.0 (n=513) |
| Mean PNs on day                | 1.0 (SE 0.03) | 1.0 (SE 0.05) |
| Practices located in a city    | 197 (37.6%)   | 185 (34.4%)   |
| Practices located in a town    | 231 (43.9%)   | 247 (46.0%)   |
| Practices Located in a village | 98 (18.6%)    | 105 (19.5%)   |

In both cases, practices received the questionnaire via email and an additional reminder email. The number of practices that provided valid responses, defined as providing information for overall and on the day data, was comparable. By using Mann-Whitney U test it was possible to derive relationships between the mean consultations per clinician per day. There were an additional twelve responses received for the during COVID-19 survey. The geographic spread of the practices was similar, though there was a small increase in single-handed practices responding; however, this did not have a significant impact when comparing consultation methods.

In the pre-COVID-19 survey, the proportion of missing responses ranged from 0.6% to 10.5%, the questions that had more missing responses were the number of consultations completed by practice nurses, with 6.8% and 10.5% of practices skipping these questions.

Of the completed surveys the proportion of missing answers ranged from 1.1% to 56.7% in the during COVID-19 survey. The questions that had missing answers were the financial questions, items 8 to 11, with a range of 4.5% to 56.7% practices not answering these questions.

### *Consultations*

In the survey pre-COVID-19, items 5, 7, and 8 asked the number of consultations GPs and practice nurses completed in person, using telemedicine, and in visits to homes and nursing homes. Overall, 36,821 GP consultations were recorded by 523 practices. 87.3% of appointments occurred face-to-face, 10.5% were telemedicine and the remainder were visits to homes and nursing homes.

During COVID-19, items 21, 22, 23, and 24 asked practices to report the number of GP and practice nurse consultations completed in person, using telemedicine, and in visits to homes and nursing homes. The main mode of consultation changed significantly. This time, 530 practices reported 25,596 consultations. Over half of the GP consultations occurred via telemedicine (57.0%) and 41.0% occurred face-to-face with the remaining visits to homes or nursing homes. Table 2 shows the proportion of consultations by each consultation method for GPs and practice nurses at each time point.

**Table 2: Summary of Consultations**

| Consultation Method                                           | Pre COVID-19 Consultations                               | During COVID-19 Consultations                            |
|---------------------------------------------------------------|----------------------------------------------------------|----------------------------------------------------------|
| GP Face-to-Face                                               | Total: 32,160<br>Proportion: 87.3%<br>Respondents: n=523 | Total: 10,484<br>Proportion: 41.0%<br>Respondents: n=530 |
| GP Telemedicine (including video, telephone and other remote) | Total: 3895<br>Proportion: 10.5%<br>Respondents: n=508   | Total: 14,588<br>Proportion: 57.0%<br>Respondents: n=523 |
| GP home visits                                                | Total: 483                                               | Total: 299                                               |

|                                                               |                                                          |                                                      |
|---------------------------------------------------------------|----------------------------------------------------------|------------------------------------------------------|
|                                                               | Proportion:1.3%<br>Respondents: n=510                    | Proportion: 1.2%<br>Respondents: n=517               |
| GP nursing home visits                                        | Total: 322<br>Proportion: 0.9%<br>Respondents: n=496     | Total: 225<br>Proportion: 0.9%<br>Respondents: n=503 |
| PN Face-to-Face                                               | Total: 11,417<br>Proportion: 82.4%<br>Respondents: n=490 | Total: 5908<br>Proportion: 67.6%<br>Respondents: 489 |
| PN Telemedicine (including video, telephone and other remote) | Total: 2436<br>Proportion: 17.6%<br>Respondents: n=471   | Total: 2828<br>Proportion: 32.4%<br>Respondents: 469 |

Face-to-face appointments decreased from 87.3% to 41.0% of all GP consultations and consultations by telemedicine increased from 10.5% to 57.0% of reported consultations. Before the start of the pandemic, 12.5% of all consultations (by GPs and practice nurses) were conducted via telemedicine compared to 51.0% after the pandemic began.

Pre-COVID-19, 490 practices reported that practice nurses completed 13,853 consultations. Just under a fifth, 17.6% (n=471), of practice nurse consultations were via telemedicine and 82.4% (n=490) were face-to-face. During the pandemic, 489 practices reported 8736 practice nurse consultations. The consultations via telemedicine made up 32.4% (n=469), with the remainder conducted face to face (67.6%; n=489).

Before the pandemic began, practice nurses had a higher proportion of telemedicine appointments than GPs – 17.6% of practice nurse appointments in February 2020 compared to only 10.5% of GP appointments. During COVID-19, 57.0% of GP appointments occurred via telemedicine compared to 32.4% of practice nurse appointments. The differences of the mean consultations per GP or nurse pre COVID-19 and during were all significantly different. For GPs, face-to-face consultations went from a median of 26 IQR (21.3, 30) to a median of 8 (6, 13) during – a significant drop ( $p<0.001$ ). Similarly, telemedicine GP consultations went from a median of 2.4 IQR (0, 5.33) to a median of 11.33 IQR (6, 19) i.e. they went up ( $p<0.001$ ). Furthermore, the differences pre and during were all highly significant  $p<0.001$ , GP visits to homes home went down, as did nurses home visits, practice nurse face to face consultations went down and practice nurse telemedicine went up.

Item 25 of the survey taken during the pandemic response asked if practices had noticed a decline in certain high traffic patient groups. Overall, there was a reported decline in non-COVID-19 related consultations. Five hundred twenty-six practices answered this question, the question was in tick-box format and practices could select any number of the options. Almost all practices – 484 practices – noticed a decline for children under six years old and 418 saw a decline for patients over 70 years (two patient groups with free GP care). Table 3 shows the decline in non-COVID-19 related consultations from each of these patient groups at group and single-handed practices.

**Table 3: Decline in non-COVID-19 consultations by key patient groups and practice type.**

|                            | Number of Practices | Percent of Practices<br>(n=538) |
|----------------------------|---------------------|---------------------------------|
| Children under 6 years old | Total: 484          | 90.0%                           |

|                                    |            |       |
|------------------------------------|------------|-------|
| Adults over 70                     | Total: 418 | 77.7% |
| People with chronic conditions     | Total: 399 | 74.2% |
| People with mental health concerns | Total: 297 | 55.2% |

### *Practice income impact*

In response to item 7, which asked practices whether there had been a change in profitability since the pandemic started, 80.0% (n=536) reported a decrease in profitability. This was reported by 124 single-handed practices and 305 group practices. These practices estimated they would have a 35.1% decrease in profitability on average. However, in item 8, only 47.9% (257) practices said they had completed a formal assessment of same.

More group practices completed formal account reviews assessing the change in practice income and profit - 210 (55.0%) group practices had done this compared to just 47 (30.1%) single-handed practices. Single-handed practices estimated an average loss of 41.5%, compared to the average estimate of 32.6% for group practices. The lower number of formal assessments by single-handed practices could explain part of this difference, through overestimates by GPs when completing the survey.

Item 10 asked practices, which, if any, assistance measures to help the business manage the financial impact of COVID-19, had been put in place. Three hundred eight (57.9%) practices implemented one or more of the changes listed to accommodate for any lost profit. The most popular cost saving measure used was asking staff to take their annual leave early, with 27.1% of practices implementing this measure.

There were no significant relationships between practice size and implementing the listed measures.

Item 11 asked practices to select staff groups that had been affected by reduced hours, salary, or redundancy. Two hundred thirty three practices (43.3%) indicated they had staff that were affected. The most affected staff has been receptionists with 103 (19.1%) practices selecting this option. Following that, 83 practices (15.4%) said practices nurses had been affected. A further 83 practices stated salaried GPs were affected. Forty-six GPs left comments as well, most highlighting that they had been the one to reduce their personal salary for the sake of keeping their staff. Table 4 shows the proportion of practices that used the following methods to recover income during the pandemic.

**Table 4: Measures introduced to help the business manage the financial effects of COVID-19**

| Answer Choices                                                                 | Single-Handed Practices (n=156) | Group Practices (n=382)         |
|--------------------------------------------------------------------------------|---------------------------------|---------------------------------|
| Have informed staff to take annual leave early                                 | Total: 22<br>Proportion: 14.1%  | Total: 124<br>Proportion: 32.4% |
| Have asked staff to reduce their hours and work them back up later in the year | Total: 12<br>Proportion: 7.7%   | Total: 56<br>Proportion: 14.7%  |

|                                                                            |                                |                                |
|----------------------------------------------------------------------------|--------------------------------|--------------------------------|
| Have formally reduced staff hours and payment until profitability improves | Total: 16<br>Proportion: 10.3% | Total: 76<br>Proportion:19.9%  |
| Have made staff redundant                                                  | Total: 15<br>Proportion: 9.6%  | Total: 37<br>Proportion: 9.7%  |
| Have applied for the employer wage subsidy scheme                          | Total: 15<br>Proportion:9.6%   | Total: 63<br>Proportion: 16.5% |

## Discussion

### *Principal Findings*

A shift to telemedicine was observed from 10.5% of all GP consultations and 17.6% of practice nurse consultations pre-COVID-19 to 57.0% and 32.4% respectively during the COVID-19 response.

More than half of practices saw decreases in non-COVID-19 related consultations from vulnerable patient groups. Particularly, non-COVID-19 related visits from patients under 6 and over 70 – who receive free GP care – decreased despite usually being frequent users of health services.

Finally, practices' finances have been impacted, with 80.0% reporting reduced profit. Moreover, two-fifths of practices had staff affected by redundancy, reduced hours or reduced salary as a measure to offset the financial impact of the pandemic.

### *Strengths and weaknesses of the study*

Our surveys are based on a self-selecting sample, which comes with inherent bias. The responding samples are different and we cannot do a direct practice-based comparison; however, key comparisons indicated that the samples were comparable. As the study design used a cross-sectional survey approach, a key limitation was the inability to determine causal relationships between the surveys. Due to the changing atmosphere caused by COVID-19, the survey questions were updated and the second iteration was longer – this difference may have caused bias when answering questions. Furthermore, we did not collect information that would allow for meaningful geographical analyses, and therefore could not account for regional and socioeconomic differences, which could affect consultation methods. Data is based on reported data and not from data extracted from general practice systems and hence may lead to under- or over-reporting. The survey was completed by one GP per practice, which could have reduced the accuracy of practice nurse consultation figures. Additionally, we did not collect patient population information so adjustment for disability could not be completed or compared nationally. Finally, the results assume that the national picture corresponds with that of this sample of GP practices.

However, a strength of these surveys is the number of practices and FTE GPs represented. In the pre-COVID-19 survey, there were 1,504.5 FTE GPs represented, employed by the 526 responding practices. In the post-COVID-19 survey, 1276.5 (n=537) FTE GPs from the 538 responding practices were represented. This means an estimated 32% and 33% respectively of all practices in Ireland were captured in each survey. While this is a good proportion, it is not a majority; therefore, the proportion of each consultation method is an estimate and should be considered as such in a national context.



1  
2  
3 Another strength is that the representation of both single-handed and group practices was similar to  
4 national figures [20] making the response more generalizable. And, while detailed geographical  
5 information was not collected, both samples included at least one practice in all parts of the country  
6 with more in cities such as Dublin and Cork, which is consistent with the geographical spread of  
7 practices previously reported [21].  
8  
9

### 10 *Interpretation in terms of international literature/Strengths and weaknesses compared* 11 *to other literature* 12

13 Since the beginning of the COVID-19 pandemic, there have been many changes rapidly implemented  
14 in healthcare across the world and they are having an impact on clinicians [16, 17]. Our study  
15 showed a decrease in GP appointments and overall in general practice (GPs and practice nurses).  
16 This is similar to reports in the UK [22], where the NHS has noticed a 30% decrease in the number of  
17 GP appointments compared to the same time in 2019.  
18

19  
20 Our study showed a substantial shift from 12.5% to 51.0% of GP and practice nurse consultations in  
21 Ireland delivered via telemedicine. The UK reports are varied; however, they show a similar shift to  
22 telemedicine consultations. With an overall 30% drop in all consultations, GPs reported  
23 consultations changing from 90-95% face-to-face to 85% remote [22, 23]. The current UK estimates  
24 are higher than ours are; however, their telemedicine rate pre-COVID-19 was also higher [22]. Spain  
25 also reports an increase in the use of virtual consultations, at 68.3% during the pandemic [24]. The  
26 proportion of face-to-face GP consultations decreased from 87.3% to 41.0% in our study, showing a  
27 similar reduction to England where proportions changed from 70% to 23% [25].  
28  
29

30 The majority (80.2%) of our practices reported reduced practice profit, and this has been seen  
31 elsewhere with GPs in the United States of America turning to crowdfunding to help their practices,  
32 and GPs in Belgium and Australia also feeling the effects of changing remuneration during COVID-19  
33 [16, 17, 26].  
34

35 Similar studies comparing the impact of COVID-19 on practice consultations are rare. Much of the  
36 literature to date on delivery type changes are based on commentaries and not actual  
37 measurements [24, 27]. However, there are a handful of recent publications about the use of  
38 healthcare during the pandemic. A recent German study with 1,095 GPs and patients aged 65 or  
39 older found that there was a 14% decrease in consultations in May 2020 compared to the same time  
40 in 2019, and the rate of diabetes, dementia, depression, cancer and stroke diagnoses decreased  
41 during lockdown (between -17% and -26%) [28]. In a survey of Australian GPs, 73% of practices had a  
42 reduction in bookings and 77% had a decrease in practice income; meanwhile, telephone calls (93%)  
43 and practice costs (81%) increased [17]. These results support our survey's findings that these  
44 challenges have also been experienced by GPs in Ireland. A key strength of this paper is that it adds  
45 to the knowledge base in terms of the potential impact of the COVID-19 pandemic on general  
46 practice in the current void of such literature.  
47  
48  
49

### 50 *Implications for practice* 51

52 GPs are motivated by altruism to work during pandemics despite the high personal risk, and they are  
53 enthusiastic about further training and information [5]. However, despite preparedness planning,  
54 implementing pandemic policies faces multiple obstacles [5]. GPs are facing rapidly changing patient  
55 flows, clinical algorithms, new care pathways, and the need for new ways of delivering high-quality  
56 care [16, 17, 24, 27, 28, 29]. Irish GPs have implemented many changes during the COVID-19  
57 pandemic. The RACGP recommends 'a planned and coordinated approach' when implementing a  
58  
59  
60

1  
2  
3 telehealth service [30]; however, due to the urgent nature of the current situation, this has not been  
4 possible. Maintaining the quality of healthcare is important in sustaining a healthy workforce, which  
5 is essential to support a healthy economy during and after the pandemic.  
6

7 Ireland, like many other countries, has taken massive steps towards the regular use of remote  
8 consultations, seemingly overnight, with previous trepidation regarding continuity of care and safety  
9 falling away out of necessity [16, 29]. The rapid national adoption of telemedicine consultations as  
10 well as electronic prescribing has presented opportunity; however, GPs are concerned that without  
11 as much face-to-face contact, critical non-verbal communication is missing from consultations and in  
12 some cases, telephone consults are insufficient to address patient concerns [16].  
13  
14

15 Ireland has two health strategies promoting the use of technology to enable patient-centred care  
16 nationally. Sláintecare, the current healthcare strategy in Ireland, aims to establish a national health  
17 fund that will help deliver universal healthcare and introduce comprehensive eHealth infrastructure  
18 [11]. This strategy supported the 2013 eHealth strategy, which had an objective of more affordable  
19 and more personalised care for all by capitalising on technology [31]. During the pandemic, practices  
20 across the country have swiftly transitioned to using technology such as a secure email facility  
21 between health care providers (Healthmail), e-prescribing, and telemedicine (video and telephone)  
22 consultations. Before the COVID-19 pandemic began, clinicians in primary care had used  
23 telemedicine interventions [29], but it was not the main form of care. Changes adopted during this  
24 pandemic accelerated the digitalisation of healthcare [29]. This could lead the way to lasting  
25 adoption of technology such as e-prescribing and telephone and video consultations after the  
26 pandemic.  
27  
28  
29

30 Telemedicine has been viewed as a way to lower costs and see more patients [32, 33, 34] but was  
31 rare in Irish general practice up to now, and here, as elsewhere, there was some resistance and  
32 concern [16]. However, the current COVID-19 pandemic has resulted in telemedicine consultations  
33 being recommended for all GPs [4]. Patients, like health care workers, have adapted to telemedicine  
34 consultations being the standard method of consultation; previous studies found that patients found  
35 video consultations acceptable [32] but age (over 60) and computer proficiency were found to  
36 negatively impact a patient's view of acceptability [33, 34]. Telemedicine has been invaluable during  
37 the outbreak of COVID-19, as it has enabled routine care to continue to some degree; however,  
38 patients who are digitally disadvantaged are often from populations already experiencing greater  
39 health risks - such as older people and those in lower socioeconomic classes [32, 34]. Going forward,  
40 special attention must be given to reducing health inequalities exacerbated by recent changes in  
41 care.  
42  
43  
44  
45

46 Furthermore, a noted decrease in consultations for non-COVID related symptoms has been observed  
47 in our survey. Patients who are most vulnerable, such as people over 65, have also been avoiding  
48 seeking care in other countries [16, 26, 28]. This could have serious impacts on health outcomes and  
49 patient safety with calls on patients not to self-diagnose or delay seeking treatment [16, 26, 28].  
50 Patients are also changing the way they use health services, with more emphasis on self-care [16, 24,  
51 28]. However, not all patients will have the same capacity for caring for their health without the level  
52 of support a GP or practice nurse can provide with face-to-face consultations. More research on  
53 patient and physician satisfaction and whether health outcomes are impacted by consultation types  
54 is needed to develop guidelines and policies on how frequently remote consultations can be used.  
55 Patient feedback will be invaluable for maintaining lasting benefits.  
56  
57  
58  
59  
60

1  
2  
3 The COVID-19 pandemic has the potential to change general practice forever, and this does not only  
4 apply in Ireland but has been noted elsewhere [15, 16, 17, 22, 24, 28]. The adoption of ‘total triage’  
5 systems has been seen during this pandemic whereby GPs can decide the mode of follow-up  
6 consultation, whether that is face-to-face, video call or telephone. As we look to a post-COVID  
7 landscape, there is a case for general practice retaining this to allow more flexibility in how  
8 consultations are delivered according to the needs and preferences of patients. However, telephone  
9 triage does not reduce GP workload, so we need to evaluate the impacts on workload and patient-  
10 centred care [16, 32, 33, 34]. While it is unlikely that we will maintain this level of telemedicine  
11 consultations, it is expected that how general practice functions will not return to as it was before  
12 [29, 35].  
13  
14

15  
16 However, we should not lose sight of the relationship between the GP and patient and the  
17 importance of good communication and trust [16, 26, 27, 29, 32, 33]. Telemedicine does not work  
18 for all patients or health problems, and there is a need to establish what works best for different  
19 patients [16, 27, 32, 33, 34]. We need to evaluate the impact on patient experience, health  
20 inequalities and patient-centred care [33, 36].  
21

22 Since the beginning of June 2020, renewed efforts have been made to reassure and encourage the  
23 public to continue seeking medical advice from their GPs by making an appointment [36].  
24

#### 25 *Unanswered questions and future research*

26  
27 How general practice is delivered will not return to as before; increased telemedicine is likely. It is  
28 necessary to assess the impact of this shift on patient health and to assess healthcare provider and  
29 patient experience to ensure continued high-quality care and patient safety. Furthermore, we need  
30 to understand the impact of changing work requirements and evolving consultation techniques on  
31 general practice workload and practice income and viability.  
32  
33

#### 34 **DECLARATIONS**

##### 35 *Abbreviations*

36 ECDC – European Centre for Disease Prevention and Control

37  
38 ESRI – Economic and Social Research Institute

39  
40 FTE – Full time equivalent

41  
42 GP - General Practitioner

43  
44 HSE - Health Service Executive

45  
46 ICGP - Irish College of General Practitioners

47  
48 NHS – National Health Service (UK)

49  
50 PN - Practice Nurse

51  
52 PPE – Personal protective equipment

53  
54 RACGP – Royal Australian College of General Practitioners

55  
56 WHO - World Health Organisation  
57  
58  
59  
60

## Copyright

The Corresponding Author has the right to grant on behalf of all authors and does grant on behalf of all authors, an exclusive licence (or non exclusive for government employees) on a worldwide basis to the BMJ Publishing Group Ltd to permit this article (if accepted) to be published in BMJ editions and any other BMJ PGL products and sublicenses such use and exploit all subsidiary rights, as set out in our licence.

## Competing interests

All authors have completed the *Unified Competing Interest form* (available on request from the corresponding author) and declare: no support from any organisation for the submitted work; no financial relationships with any organisations that might have an interest in the submitted work in the previous three years, no other relationships or activities that could appear to have influenced the submitted work.

## Ethics approval and consent to participate

Ethical approval was obtained for the study from the Irish College of General Practitioners Research Ethics Committee.

## Public and patient involvement

Patents and members of the public were not involved in this research because it was not relevant to the study questions. The study focused on changes experienced by general practitioners. General practitioners were involved in the study design as members of the ICGP Board who approved and oversaw the project.

## Consent for publication

Not applicable.

## Availability of data and materials

The data is available on reasonable request to the corresponding author.

## Funding

The project was in part supported via a Quality Improvement Grant from Pfizer under its Global Medical Grants (reference #6216072). The funder had no role in project design, data collection, analysis, interpretation or reporting

## Authors' contributions

CC was the project principal investigator. She conceived the project idea, designed the questionnaire, undertook the data collection, supervised the data analysis and contributed to the paper.

RH was the project research assistant. She analysed the data, undertook the analysis and contributed to the paper.

Both authors have read and approved the final paper.

Name of guarantor: Claire Collins.

### Transparency declaration

The authors affirm that the manuscript is an honest, accurate, and transparent account of the study being reported; that no important aspects of the study have been omitted; and that any discrepancies from the study as planned (and, if relevant, registered) have been explained.

### Acknowledgements

The authors wish to acknowledge the valuable contribution and time given by all participants. Dr. Jean Saunders', affiliated with CSCS Ireland, statistical advice on the paper is noted and appreciated.

### References

1. WHO Newsroom. *Timeline of WHO's response to COVID-19*. [Internet] Geneva: World Health Organisation; 29 June 2020 [updated 30 July 2020]. Available from: <https://www.who.int/china/news/detail/09-01-2020-who-statement-regarding-cluster-of-pneumonia-cases-in-wuhan-china> [Accessed 24<sup>th</sup> August 2020]
2. WHO. *WHO Statement regarding cluster of pneumonia cases in Wuhan, China*. [Internet] Geneva: World Health Organisation; 9 January 2020. Available from: <https://www.who.int/china/news/detail/09-01-2020-who-statement-regarding-cluster-of-pneumonia-cases-in-wuhan-china> [Accessed 24<sup>th</sup> August 2020]
3. WHO. *WHO Director-General's statement on IHR Emergency Committee on Novel Coronavirus (2019-nCoV)*. [Internet] Geneva: World Health Organisation; 30 January 2020. Available from: [https://www.who.int/dg/speeches/detail/who-director-general-s-statement-on-ihremergencycommittee-on-novel-coronavirus-\(2019-ncov\)](https://www.who.int/dg/speeches/detail/who-director-general-s-statement-on-ihremergencycommittee-on-novel-coronavirus-(2019-ncov)) [Accessed 24<sup>th</sup> August 2020]
4. HSE/HPSC. *Guiding principles for Infection Prevention and Control when returning to routine General Practice during pandemic v2.1*. [Internet] Dublin: Health Protection Surveillance Centre; 10 July 2020. Available from: <https://www.hpsc.ie/a-z/respiratory/coronavirus/novelcoronavirus/guidance/primarycareguidance/adviseriskassessmentandmanagementofpatients/Guiding%20principles%20IPC%20GP.pdf> [Accessed 24<sup>th</sup> August 2020]
5. Patel MS, Phillips CB, Pearce C, Kljakovic M, Dugdale P, Glasgow N. General practice and pandemic influenza: a framework for planning and comparison of plans in five countries. *PLoS One* 2008 May 28;3(5):e2269.
6. Kunin M, Engelhard D, Thomas S, Ashworth M, Piterman L. Challenges of the Pandemic Response in Primary Care during Pre-Vaccination Period: A Qualitative Study. *Isr.J.Health.Policy.Res.* 2015 Oct 15;4:32-015-0028-5. eCollection 2015.
7. WHO. *2019 Novel Coronavirus (2019-nCoV): Strategic Preparedness and Response Plan*. [Internet] Geneva: World Health Organisation; 2020 [Draft as of 3 February 2020]. Available from: <https://www.who.int/docs/default-source/coronaviruse/srp-04022020.pdf?ua=1> [Accessed 24<sup>th</sup> August 2020]
8. European Centre for Disease Prevention and Control. *Infection prevention and control for COVID-19 in healthcare settings – Fourth update*. [Internet] 3 July 2020. ECDC: Stockholm; 2020. Available from: <https://www.ecdc.europa.eu/en/publications-data/infection-prevention-and-control-and-preparedness-covid-19-healthcare-settings> [Accessed 25<sup>th</sup> August 2020]
9. NPHE. *National Public Health Emergency Team (NPHE) COVID-19 Subgroup : Guidance and Evidence Synthesis*. [Internet] Dublin: Department of Health; 6 May 2020 [Last

- 1  
2  
3 updated 4 August 2020]. Available from: <https://www.gov.ie/en/collection/07d750-nphet-covid-19-subgroup-guidance-and-evidence-synthesis/> [Accessed 25<sup>th</sup> August 2020]
- 4  
5  
6 10. HSE. *Primary Care Reimbursement Service Statistical Analysis of Claims and Payments 2019*. [Internet] Dublin: Health Care Executive Primary Reimbursement Service; 2020.  
7 Available from: <https://www.hse.ie/eng/staff/pdrs/pdrs-publications/annual-report-2019.pdf> [Accessed 25<sup>th</sup> August 2020]  
8  
9  
10  
11 11. Committee on the Future of Healthcare. *Sláintecare Report*. [Internet] Dublin: Houses of  
12 the Oireachtas; May 2017. Available from:  
13 [https://www.gov.ie/pdf/?file=https://assets.gov.ie/165/270718095030-1134389-](https://www.gov.ie/pdf/?file=https://assets.gov.ie/165/270718095030-1134389-Slaintecare-Report-May-2017.pdf#page=1)  
14 [Slaintecare-Report-May-2017.pdf#page=1](https://www.gov.ie/pdf/?file=https://assets.gov.ie/165/270718095030-1134389-Slaintecare-Report-May-2017.pdf#page=1) [Accessed 25<sup>th</sup> August 2020]  
15  
16 12. Department of Health. *Sláintecare Action Plan 2019*. [Internet] Dublin: Department of  
17 Health; 2019. Available from:  
18 <https://assets.gov.ie/22606/4e13c790cf31463491c2e878212e3c29.pdf> [Accessed 28<sup>th</sup>  
19 August 2020]  
20  
21 13. Crosbie B, O'Callaghan ME, O'Flanagan S, Brennan D, Keane G, Behan W. A real-time  
22 measurement of general practice workload in the Republic of Ireland: a prospective study.  
23 *Br.J.Gen.Pract.* 2020 Jun 25;70(696):e489-e496.  
24  
25 14. Department of Health. *Health Service Capacity Review 2018 Executive Report: Review of*  
26 *Health Demand and Capacity Requirement in Ireland to 2031 – Findings and*  
27 *Recommendations*. London: PA Knowledge Limited; 2018. Available from:  
28 <https://assets.gov.ie/10131/5bb5ff12463345bbac465aaf02a2333d.pdf> [Accessed 25<sup>th</sup>  
29 August 2020]  
30  
31 15. Liu Y, Wang Z, Ren J, Tian Y, Zhou M, Zhou T, et al. A COVID-19 Risk Assessment Decision  
32 Support System for General Practitioners: Design and Development Study. *J.Med.Internet*  
33 *Res.* 2020 Jun 29;22(6):e19786.  
34  
35 16. Verhoeven V, Tsakitidis G, Philips H, Van Royen P. Impact of the COVID-19 pandemic on  
36 the core functions of primary care: will the cure be worse than the disease? A qualitative  
37 interview study in Flemish GPs. *BMJ Open* 2020 Jun 17;10(6):e039674-2020-039674.  
38  
39 17. Kippen R, O'Sullivan B, Hickson H, Leach M, Wallace G. A national survey of COVID-19  
40 challenges, responses and effects in Australian general practice. *Aust J Gen Pract.* 2020  
41 Nov;49(11):745-751. doi: 10.31128/AJGP-06-20-5465.  
42  
43 18. CSO. *CSO Statistical Release: Population and Migration Estimates*. [Internet] Cork: Central  
44 Statistics Office; April 2019. Available from:  
45 [https://www.cso.ie/en/releasesandpublications/er/pme/populationandmigrationestimate](https://www.cso.ie/en/releasesandpublications/er/pme/populationandmigrationestimate_sapril2019/)  
46 [sapril2019/](https://www.cso.ie/en/releasesandpublications/er/pme/populationandmigrationestimate_sapril2019/) [Accessed 25<sup>th</sup> August 2020]  
47  
48 19. HSE. *Medical Workforce Planning: Future Demand for General Practitioners 2015-2025*.  
49 [Internet] Dublin: National Doctor Training and Planning, HR Directorate, Health Service  
50 Executive; September 2015. Available from: [https://www.hse.ie/eng/staff/leadership-](https://www.hse.ie/eng/staff/leadership-education-development/met/plan/gp-medical-workforce-planning-report-sept-2015.pdf)  
51 [education-development/met/plan/gp-medical-workforce-planning-report-sept-2015.pdf](https://www.hse.ie/eng/staff/leadership-education-development/met/plan/gp-medical-workforce-planning-report-sept-2015.pdf)  
52 [Accessed 25<sup>th</sup> August 2020]  
53  
54 20. O'Kelly M, Teljeur C, O'Kelly F, Ni Shulleabhain A, O'Dowd T. *Structure of General Practice*  
55 *in Ireland 1982 – 2015*. [Internet] Dublin: Trinity College Dublin/Irish College of General  
56 Practitioners; 2016. Available from:  
57 [https://www.tcd.ie/medicine/public\\_health\\_primary\\_care/assets/pdf/structure-of-](https://www.tcd.ie/medicine/public_health_primary_care/assets/pdf/structure-of-general-practice-2016.pdf)  
58 [general-practice-2016.pdf](https://www.tcd.ie/medicine/public_health_primary_care/assets/pdf/structure-of-general-practice-2016.pdf) [Accessed 28<sup>th</sup> August 2020]  
59  
60 21. Smith S, Walsh B, Wren M, Barron S, Morgenroth E, Eighan J, et al. *Geographic profile of*  
*healthcare needs and non-acute healthcare supply in Ireland*. ESRI Research Series: 90.

- [Internet] Dublin: The Economic and Social Research Institute; July 22 2019. Available from: [https://www.esri.ie/system/files/publications/RS90\\_0.pdf](https://www.esri.ie/system/files/publications/RS90_0.pdf) [Accessed 28th August 2020]
22. The Health Foundation. *How might COVID-19 affected people's ability to see their GP? COVID-19 Chart Series*. [Internet] London: The Health Foundation; 1 May 2020. Available from: <https://www.health.org.uk/news-and-comment/charts-and-infographics/how-might-covid-19-have-affected-peoples-ability-to-see-GP> [Accessed 25th August 2020]
23. NHS. Letter to: Chief executives of all NHS trusts and foundation trusts; CCG Accountable Officers; GP practices and Primary Care Networks; Providers of community health services; NHS 111 providers. *IMPORTANT - FOR ACTION - SECOND PHASE OF NHS RESPONSE TO COVID19*. From the Chief Executive Sir Simon Stevens & Chief Operating Officer Amanda Pritchard. [Internet] London: NHS; 29 April 2020. Available from: <https://www.england.nhs.uk/coronavirus/wp-content/uploads/sites/52/2020/04/second-phase-of-nhs-response-to-covid-19-letter-to-chief-execs-29-april-2020.pdf> [Accessed 25th August 2020]
24. Munoz MA, Lopez-Grau M. Lessons learned from the approach to the COVID-19 pandemic in urban primary health care centres in Barcelona, Spain. *Eur.J.Gen.Pract.* 2020 Dec;26(1):106-107.
25. RCGP. *General practice in the post Covid world: Challenges and opportunities for general practice*. [Internet] London: Royal College of General Practitioners; 2020. Available from: <https://www.rcgp.org.uk/-/media/Files/News/2020/general-practice-post-covid-rcgp.ashx?la=en> [Accessed 25<sup>th</sup> August 2020]
26. Rubin R. COVID-19's Crushing Effects on Medical Practices, Some of Which Might Not Survive. *JAMA* 2020 Jun 18.
27. de Sutter A, Llor C, Maier M, Mallen C, Tatsioni A, van Weert H, et al. Family medicine in times of 'COVID-19': A generalists' voice. *Eur.J.Gen.Pract.* 2020 Dec;26(1):58-60.
28. Michalowsky B, Hoffmann W, Bohlken J, Kostev K. Effect of the COVID-19 Lockdown on Disease Recognition and Utilization of Healthcare Services in the Older Population in German: A Cross-sectional Study. *Age and Ageing*. 2020.
29. Marshall M, Howe A, Howsam G, Mulholland M, Leach J. COVID-19: a danger and an opportunity for the future of general practice. *Br.J.Gen.Pract.* 2020 May 28;70(695):270-271.
30. RACGP. *Implementation guidelines for video consultations in general practice: A telehealth initiative*. 3<sup>rd</sup> Edition. [Internet] East Melbourne Victoria: The Royal Australian College of General Practitioners; September 2012. Available from: <https://www.racgp.org.au/download/Documents/Telehealth/videoconsultguidelinesv3.pdf> [Accessed 25th August 2020]
31. HSE/Department of Health. *eHealth Strategy for Ireland*. [Internet] Dublin: Department of Health; 2013. Available from: <https://www.gov.ie/en/publication/6b7909-ehealth-strategy-for-ireland/> [Accessed 25<sup>th</sup> August 2020]
32. Thiyagarajan A, Grant C, Griffiths F, Atherton H. Exploring patients' and clinicians' experiences of video consultations in primary care: a systematic scoping review. *BJGP open*. 2020;4(1).
33. Johnston S, MacDougall M, McKinstry B. The use of video consulting in general practice: semi-structured interviews examining acceptability to patients. *BMJ Health & Care Informatics* 2016;23:doi: 10.14236/jhi.v23i2.141

- 1  
2  
3 34. Gilligan P, Bennett A, Houlihan A, Padki A, Owen N, Morris D, et al. The Doctor Can See  
4 You Now: A Key Stakeholder Study Into The Acceptability Of Ambulance Based  
5 Telemedicine. *Ir.Med.J.* 2018 Jun 7;111(6):769.  
6  
7 35. Thornton J. Covid-19: how coronavirus will change the face of general practice forever.  
8 *BMJ* 2020 Mar 30;368:m1279.  
9  
10 36. HSE. *Coronavirus: Get urgent medical help for non-coronavirus symptoms.* [Internet] 5  
11 June 2020. Available from: [https://www2.hse.ie/conditions/coronavirus/get-urgent-](https://www2.hse.ie/conditions/coronavirus/get-urgent-medical-help-for-non-coronavirus-symptoms.html)  
12 [medical-help-for-non-coronavirus-symptoms.html](https://www2.hse.ie/conditions/coronavirus/get-urgent-medical-help-for-non-coronavirus-symptoms.html) [Accessed 25th August 2020]  
13  
14  
15  
16  
17  
18  
19  
20  
21  
22  
23  
24  
25  
26  
27  
28  
29  
30  
31  
32  
33  
34  
35  
36  
37  
38  
39  
40  
41  
42  
43  
44  
45  
46  
47  
48  
49  
50  
51  
52  
53  
54  
55  
56  
57  
58  
59  
60

For peer review only



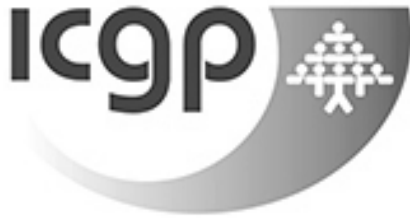

## Practice Activity January 2020

### Practice Activity

**There has been a lot of media discussion regarding general practice and the ICGP would be grateful for your assistance in providing strong evidence so that we can inform this discussion and advocate on your behalf.**

**We fully appreciate that you are all very busy and we have kept the information requested to a minimum. We are asking for only one reply per practice - and this could be completed by any staff member. We have not made any questions mandatory. Of course, we hope you will complete as many as possible with the key questions relating to the number of consultations in the practice and the number of GPs and PNs on duty on the chosen day in the practice.**

**You can choose any typical working day - this could be yesterday or tomorrow - on which to provide data.**

**This survey should take about 5 minutes to complete. Thank you for taking time out of your already busy schedule to contribute data to inform this discussion and ensure accurate information is available directly from general practice.**

### **Dr. Tony Cox, ICGP Medical Director**

\* 1. I confirm that I have read the introductory information and email invitation for this survey.

I consent to my data being used as part of this survey and any publications as a result of the findings.

I understand that my data will be retained on a secure server and for a short period will be held on a server located outside the E.U.

Data will only be held until the research is completed and it will then be deleted.

Yes I consent to the above

No I do not consent to the above, click DONE at end of survey to exit.

2. Please complete this survey in respect of any day in the surgery this week. Which day are you including data for:

- Monday  
 Tuesday  
 Wednesday  
 Thursday  
 Friday

3. How many staff (GPs and Practice Nurses) were on duty on the day you are completing this survey? Please note we are asking for full time equivalents here so if someone worked half a day that is 0.5 FTE. Please enter number in decimal format.

FTE GPs

FTE Practice Nurses

4. How many FTEs in the practice overall? Please note we are asking for full time equivalents here so if a PN usually works three days per week that is 0.6 FTE. Please enter in decimal format.

FTE GPs

FTE Practice Nurses

5. How many face to face consultations were seen in the surgery in total on the day in question: please enter in whole number format.

By GPs

By PNs

6. Do you usually leave some appointments free to accommodate urgent/same day appointments?

- Yes  No

7. How many telemedicine consultations were seen on the day in question: please enter in whole number format.

By GPs

By PNs

8. How many visits by GPs were made on the day in question? Please enter in whole number format.

To homes

To nursing homes

1 9. On the day in question: how many hours in total did you personally work in the practice (clinical and non-  
2 clinical hours)? If you are not a GP and are completing it on behalf of the practice, please leave this question  
3 blank. Please enter in decimal format e.g. 0.5 or 2.0  
4

6  
7  
8 10. What is the average waiting time to get a NON-URGENT appointment in your practice? Please enter in  
9 whole number format e.g. 0 or 4 etc.

10 For adults \_\_\_\_\_ days

12 For children \_\_\_\_\_ days

14  
15  
16 11. Is your practice closed to taking new patients?

17  
18 Yes

No

19 GMS

20  
21 Private

22  
23  
24 12. Is your practice located in

25  A City

26  A Town

27  A Village

28  
29  
30  
31  
32 13. Please indicate where your practice is located:

33  
34  
35  
36  
37 14. What is **the most significant** stressor for GPs at the moment? Please tick only one answer.

38  Income

39  Locums

40  Workload

41  Work/Life balance

42  Regulations

43  Litigation risk

44  Other (please specify)

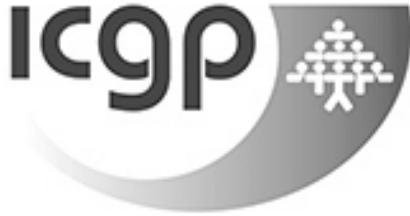

## Practice Survey on COVID-19 Changes May/June 2020

### Practice Survey on COVID-19 Changes May/June 2020

**The ICGP would be grateful for your assistance in providing strong evidence so that we can inform discussions around practice changes during COVID-19 and the supports needed going forward for general practice.**

**We are asking for only one reply per practice - and this could be completed by any staff member.**

**We have tried to keep the information requested to a minimum but also to cover all areas so as a result the survey here will take you less than 10 minutes. We have not made any questions mandatory except the Q1 re consent. Of course, we hope you will complete as many as possible.**

**Thank you for taking the time to contribute data to inform this discussion and ensure accurate information is available from general practice.**

\* 1. I confirm that I have read the introductory information and email invitation for this survey.

I consent to my data being used as part of this survey and any publications as a result of the findings.

I understand that my data will be retained on a secure server and for a short period will be held on a server located outside the E.U.

Data will only be held until the research is completed and it will then be deleted.

Yes I consent to the above (ticking this is a requirement to proceed)

No I do not consent to the above, click DONE at end of survey to exit.

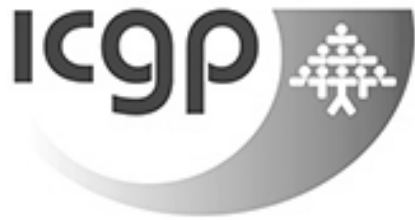

## Practice Survey on COVID-19 Changes May/June 2020

2. Is your practice located in

- A City
- A Town
- A Village

3. Please indicate where your practice is located:

4. How many FTEs GPs and Practice Nurses currently work in the practice overall? Please note we are asking for full time equivalents here so if a PN usually works three days per week that is 0.6 FTE. Please enter in DECIMAL format.

FTE GPs

FTE Practice Nurses

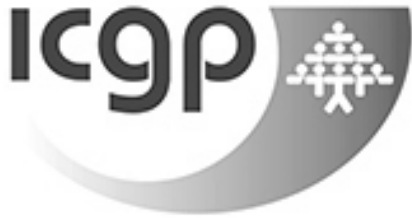

## Practice Survey on COVID-19 Changes May/June 2020

### Practice Changes

5. How has teamwork in the practice changed compared to before the COVID-19 changes?

- Very increased teamwork amongst the practice team
- Increased teamwork amongst the practice team
- Remained the same
- Decreased teamwork amongst the practice team
- Very decreased teamwork amongst the practice team

6. How has connectivity with other service providers (Consultants/Pharmacists) in general changed compared to before COVID-19?

|             | Very increased connectivity | Increased connectivity | Remained the same     | Decreased connectivity | Very decreased connectivity |
|-------------|-----------------------------|------------------------|-----------------------|------------------------|-----------------------------|
| Consultants | <input type="radio"/>       | <input type="radio"/>  | <input type="radio"/> | <input type="radio"/>  | <input type="radio"/>       |
| Pharmacists | <input type="radio"/>       | <input type="radio"/>  | <input type="radio"/> | <input type="radio"/>  | <input type="radio"/>       |

Other (please specify)

7. How is the COVID-19 pandemic affecting the practice you work in terms of profitability?

- Practice profit has improved
- No change in practice profit
- Practice profit has decreased
- I don't know if the practice profit has changed

1 8. If change noted, have you or someone else in your practice had the opportunity to do a formal comparison  
2 between your current business performance now compared to the first 2 months of 2020 or this time last year  
3 or is the above based on anecdotal evidence?  
4

- 5  Yes, we have conducted a formal assessment  
6  
7  No, based on anecdotal or informal evidence  
8  
9

10 9. If change noted, what percentage increase or decrease do you anticipate?

11  
12 0% Overall percentage change 100%  
13    
14  
15

16  
17 10. Has the practice you work in introduced any of the following measures to help the business manage the  
18 financial effects of COVID-19? Please tick all that apply.  
19

- 20  Have informed staff to take annual leave early  
21  Have asked staff to reduce their hours and work them back up later in the year  
22  Have formally reduced staff hours and payment until profitability improves  
23  Have made staff redundant  
24  Have applied for the employer wage subsidy scheme  
25  
26  
27  
28  
29

30 11. If the practice you work in has made redundancies or reduced salaries/hours which of the following  
31 possible staff groups have been affected? Please tick all that apply.  
32

- 33  Cleaners  
34  Healthcare assistants  
35  Practice nurses  
36  Advanced nurse practitioners  
37  Practice managers  
38  Receptionists  
39  Salaried GPs  
40  Other (please specify)  
41  
42  
43  
44  
45  
46

47  
48  
49  
50

## 12. What physical/consulting changes have been noticed in your practice? Please tick all that apply.

- Patients waiting outside/in car
- Triage before entering
- Limiting number of patients in waiting room
- No longer use waiting room
- Increased infection control practices
- Structural changes to reception and waiting area
- Telephone triage
- Completely managing 1st presentation fo new problem by phone
- Video consultations
- Increased use of healthmail
- Repeat prescription approach in terms of patient attending practice
- Using e-script
- Using healthmail for prescriptions
- Other (please specify)



13. Are you currently providing the following services for your patients?

|                                                                                                     | Yes                   | No                    |
|-----------------------------------------------------------------------------------------------------|-----------------------|-----------------------|
| Face-to-face assessment for patients with symptoms who may have COVID                               | <input type="radio"/> | <input type="radio"/> |
| Face-to-face assessment for urgent medical conditions non-COVID related                             | <input type="radio"/> | <input type="radio"/> |
| Face-to-face consultations for bloods only for those with chronic conditions                        | <input type="radio"/> | <input type="radio"/> |
| Face-to-face consultations for full consult for those with chronic conditions                       | <input type="radio"/> | <input type="radio"/> |
| Childhood immunisations                                                                             | <input type="radio"/> | <input type="radio"/> |
| Face-to-face antenatal care                                                                         | <input type="radio"/> | <input type="radio"/> |
| Video consultations                                                                                 | <input type="radio"/> | <input type="radio"/> |
| Safety bloods for those on long-term medication if these are recommended e.g. lithium, methotrexate | <input type="radio"/> | <input type="radio"/> |

14. Are you able to access the following in your area without referral to emergency department?

|                     | Yes, similar to before | Yes, increased access | Yes, reduced access   | No access             | Don't Know            |
|---------------------|------------------------|-----------------------|-----------------------|-----------------------|-----------------------|
| Chest x-ray         | <input type="radio"/>  | <input type="radio"/> | <input type="radio"/> | <input type="radio"/> | <input type="radio"/> |
| Ultrasound          | <input type="radio"/>  | <input type="radio"/> | <input type="radio"/> | <input type="radio"/> | <input type="radio"/> |
| Hospital phlebotomy | <input type="radio"/>  | <input type="radio"/> | <input type="radio"/> | <input type="radio"/> | <input type="radio"/> |

## 15. Has your local hospital service provided you with pathways to access the following services?

|                                                                            | Yes                   | No                    | Don't Know            |
|----------------------------------------------------------------------------|-----------------------|-----------------------|-----------------------|
| Early cancer referral for suspected breast cancer                          | <input type="radio"/> | <input type="radio"/> | <input type="radio"/> |
| Early cancer referral for suspected lung cancer                            | <input type="radio"/> | <input type="radio"/> | <input type="radio"/> |
| Early referral for suspected prostate cancer                               | <input type="radio"/> | <input type="radio"/> | <input type="radio"/> |
| Urgent gynaecology access without referral to the emergency department     | <input type="radio"/> | <input type="radio"/> | <input type="radio"/> |
| Urgent cardiac services without referral to the emergency department       | <input type="radio"/> | <input type="radio"/> | <input type="radio"/> |
| Urgent TIA assessment service without referral to the emergency department | <input type="radio"/> | <input type="radio"/> | <input type="radio"/> |

## 16. Has your local hospital service provided you with out-patient pathways for those with chronic conditions at the more severe end of the disease who require combined GP and consultant led care?

|                         | Yes                   | No                    | Don't Know            |
|-------------------------|-----------------------|-----------------------|-----------------------|
| Diabetes                | <input type="radio"/> | <input type="radio"/> | <input type="radio"/> |
| Heart failure           | <input type="radio"/> | <input type="radio"/> | <input type="radio"/> |
| Ischaemic heart disease | <input type="radio"/> | <input type="radio"/> | <input type="radio"/> |
| COPD                    | <input type="radio"/> | <input type="radio"/> | <input type="radio"/> |
| Asthma                  | <input type="radio"/> | <input type="radio"/> | <input type="radio"/> |

17. Has your local hospital service provided you with access to paediatric assessment in terms of any of the following?

|                                                                                                                                                                       | Yes                   | No                    | Don't Know            |
|-----------------------------------------------------------------------------------------------------------------------------------------------------------------------|-----------------------|-----------------------|-----------------------|
| Access to assessment for acute paediatric non-COVID medical conditions without the need to go to ED                                                                   | <input type="radio"/> | <input type="radio"/> | <input type="radio"/> |
| Pathways for paediatric outpatient referral for those who require consultant input for new diagnoses                                                                  | <input type="radio"/> | <input type="radio"/> | <input type="radio"/> |
| Pathways for paediatric outpatient for those with existing chronic medical conditions that require combined GP and consultant led care e.g. cystic fibrosis, diabetes | <input type="radio"/> | <input type="radio"/> | <input type="radio"/> |

18. Would you support the development of clearly defined care pathway between GP/community and acute services using an electronic/online system?

Yes  No  Don't Know

19. How busy is your practice overall now compared to pre-COVID-19?

Less busy  The same  Busier

20. Thinking about the last day of work this week in the practice - How many staff (GPs and Practice Nurses) were on duty on the day? Please note we are asking for full-time equivalents here so if someone worked half a day that is 0.5 FTE. Please enter answer in DECIMAL format.

FTE GPs

FTE Practice Nurses

21. How many face-to-face consultations were there on the last day in the practice? Please enter in WHOLE number format.

By GPs

By PNs

1 22. How many video consultations were there on the day in question? Please enter in WHOLE number  
2 format.

3  
4 By GPs

5  
6 By PNs

7  
8  
9 23. How many telemedicine consultations were there on the day in question? Please enter in WHOLE number  
10 format.

11  
12 By GPs

13  
14 By PNs

15  
16  
17 24. How many visits by GPs were made on the day in question? Please enter in WHOLE number format.

18  
19 To homes

20  
21 To nursing homes

22  
23 25. Overall, have you seen a decline in non-COVID-19 related consultations from any of the following? Please  
24 tick all that apply.

25  
26  Under 6's

27  
28  Over 70's

29  
30  Patients with chronic conditions

31  
32  Patients with mental health concerns

## STROBE Statement—checklist of items that should be included in reports of observational studies

|                              | Item No | Recommendation                                                                                                                                                                                                                                                                                                                                                                                                                                                         | Page No |
|------------------------------|---------|------------------------------------------------------------------------------------------------------------------------------------------------------------------------------------------------------------------------------------------------------------------------------------------------------------------------------------------------------------------------------------------------------------------------------------------------------------------------|---------|
| <b>Title and abstract</b>    | 1       | (a) Indicate the study's design with a commonly used term in the title or the abstract                                                                                                                                                                                                                                                                                                                                                                                 | 1       |
|                              |         | (b) Provide in the abstract an informative and balanced summary of what was done and what was found                                                                                                                                                                                                                                                                                                                                                                    | 2       |
| <b>Introduction</b>          |         |                                                                                                                                                                                                                                                                                                                                                                                                                                                                        |         |
| Background/rationale         | 2       | Explain the scientific background and rationale for the investigation being reported                                                                                                                                                                                                                                                                                                                                                                                   | 4       |
| Objectives                   | 3       | State specific objectives, including any prespecified hypotheses                                                                                                                                                                                                                                                                                                                                                                                                       | 4-5     |
| <b>Methods</b>               |         |                                                                                                                                                                                                                                                                                                                                                                                                                                                                        |         |
| Study design                 | 4       | Present key elements of study design early in the paper                                                                                                                                                                                                                                                                                                                                                                                                                | 5       |
| Setting                      | 5       | Describe the setting, locations, and relevant dates, including periods of recruitment, exposure, follow-up, and data collection                                                                                                                                                                                                                                                                                                                                        | 5       |
| Participants                 | 6       | (a) <i>Cohort study</i> —Give the eligibility criteria, and the sources and methods of selection of participants. Describe methods of follow-up<br><i>Case-control study</i> —Give the eligibility criteria, and the sources and methods of case ascertainment and control selection. Give the rationale for the choice of cases and controls<br><i>Cross-sectional study</i> —Give the eligibility criteria, and the sources and methods of selection of participants | 5       |
|                              |         | (b) <i>Cohort study</i> —For matched studies, give matching criteria and number of exposed and unexposed<br><i>Case-control study</i> —For matched studies, give matching criteria and the number of controls per case                                                                                                                                                                                                                                                 | 5       |
| Variables                    | 7       | Clearly define all outcomes, exposures, predictors, potential confounders, and effect modifiers. Give diagnostic criteria, if applicable                                                                                                                                                                                                                                                                                                                               | 5       |
| Data sources/<br>measurement | 8*      | For each variable of interest, give sources of data and details of methods of assessment (measurement). Describe comparability of assessment methods if there is more than one group                                                                                                                                                                                                                                                                                   | 5       |
| Bias                         | 9       | Describe any efforts to address potential sources of bias                                                                                                                                                                                                                                                                                                                                                                                                              | 5       |
| Study size                   | 10      | Explain how the study size was arrived at                                                                                                                                                                                                                                                                                                                                                                                                                              | 4-6     |
| Quantitative variables       | 11      | Explain how quantitative variables were handled in the analyses. If applicable, describe which groupings were chosen and why                                                                                                                                                                                                                                                                                                                                           | 5       |
| Statistical methods          | 12      | (a) Describe all statistical methods, including those used to control for confounding                                                                                                                                                                                                                                                                                                                                                                                  | 5       |
|                              |         | (b) Describe any methods used to examine subgroups and interactions                                                                                                                                                                                                                                                                                                                                                                                                    | 5       |
|                              |         | (c) Explain how missing data were addressed                                                                                                                                                                                                                                                                                                                                                                                                                            | 5       |
|                              | 5       | (d) <i>Cohort study</i> —If applicable, explain how loss to follow-up was addressed<br><i>Case-control study</i> —If applicable, explain how matching of cases and controls was addressed<br><i>Cross-sectional study</i> —If applicable, describe analytical methods taking account of sampling strategy                                                                                                                                                              | 5       |
|                              |         | (e) Describe any sensitivity analyses                                                                                                                                                                                                                                                                                                                                                                                                                                  | 5       |

Continued on next page

1  
2  
3  
4  
5  
6  
7  
8  
9  
10  
11  
12  
13  
14  
15  
16  
17  
18  
19  
20  
21  
22  
23  
24  
25  
26  
27  
28  
29  
30  
31  
32  
33  
34  
35  
36  
37  
38  
39  
40  
41  
42  
43  
44  
45  
46  
47  
48  
49  
50  
51  
52  
53  
54  
55  
56  
57  
58  
59  
60

| <b>Results</b>           |     |                                                                                                                                                                                                              |       |
|--------------------------|-----|--------------------------------------------------------------------------------------------------------------------------------------------------------------------------------------------------------------|-------|
| Participants             | 13* | (a) Report numbers of individuals at each stage of study—eg numbers potentially eligible, examined for eligibility, confirmed eligible, included in the study, completing follow-up, and analysed            | 5-6   |
|                          |     | (b) Give reasons for non-participation at each stage                                                                                                                                                         | n/a   |
|                          |     | (c) Consider use of a flow diagram                                                                                                                                                                           | n/a   |
| Descriptive data         | 14* | (a) Give characteristics of study participants (eg demographic, clinical, social) and information on exposures and potential confounders                                                                     | 5-7   |
|                          |     | (b) Indicate number of participants with missing data for each variable of interest                                                                                                                          | 5-10  |
|                          |     | (c) <i>Cohort study</i> —Summarise follow-up time (eg, average and total amount)                                                                                                                             | 7     |
| Outcome data             | 15* | <i>Cohort study</i> —Report numbers of outcome events or summary measures over time                                                                                                                          | 4-9   |
|                          |     | <i>Case-control study</i> —Report numbers in each exposure category, or summary measures of exposure                                                                                                         |       |
|                          |     | <i>Cross-sectional study</i> —Report numbers of outcome events or summary measures                                                                                                                           |       |
| Main results             | 16  | (a) Give unadjusted estimates and, if applicable, confounder-adjusted estimates and their precision (eg, 95% confidence interval). Make clear which confounders were adjusted for and why they were included | 5-10  |
|                          |     | (b) Report category boundaries when continuous variables were categorized                                                                                                                                    |       |
|                          |     | (c) If relevant, consider translating estimates of relative risk into absolute risk for a meaningful time period                                                                                             |       |
| Other analyses           | 17  | Report other analyses done—eg analyses of subgroups and interactions, and sensitivity analyses                                                                                                               | 5-9   |
| <b>Discussion</b>        |     |                                                                                                                                                                                                              |       |
| Key results              | 18  | Summarise key results with reference to study objectives                                                                                                                                                     | 10    |
| Limitations              | 19  | Discuss limitations of the study, taking into account sources of potential bias or imprecision. Discuss both direction and magnitude of any potential bias                                                   | 10    |
| Interpretation           | 20  | Give a cautious overall interpretation of results considering objectives, limitations, multiplicity of analyses, results from similar studies, and other relevant evidence                                   | 10-11 |
| Generalisability         | 21  | Discuss the generalisability (external validity) of the study results                                                                                                                                        | 11-14 |
| <b>Other information</b> |     |                                                                                                                                                                                                              |       |
| Funding                  | 22  | Give the source of funding and the role of the funders for the present study and, if applicable, for the original study on which the present article is based                                                | 15    |

\*Give information separately for cases and controls in case-control studies and, if applicable, for exposed and unexposed groups in cohort and cross-sectional studies.

**Note:** An Explanation and Elaboration article discusses each checklist item and gives methodological background and published examples of transparent reporting. The STROBE checklist is best used in conjunction with this article (freely available on the Web sites of PLoS Medicine at <http://www.plosmedicine.org/>, Annals of Internal Medicine at <http://www.annals.org/>, and Epidemiology at <http://www.epidem.com/>). Information on the STROBE Initiative is available at [www.strobe-statement.org](http://www.strobe-statement.org).

# BMJ Open

## How COVID-19 has affected general practice consultations and income – General Practitioner cross-sectional population survey evidence from Ireland.

|                                 |                                                                                                                                                       |
|---------------------------------|-------------------------------------------------------------------------------------------------------------------------------------------------------|
| Journal:                        | <i>BMJ Open</i>                                                                                                                                       |
| Manuscript ID                   | bmjopen-2020-044685.R3                                                                                                                                |
| Article Type:                   | Original research                                                                                                                                     |
| Date Submitted by the Author:   | 09-Mar-2021                                                                                                                                           |
| Complete List of Authors:       | Homeniuk, Robyn; Irish College of General Practitioners, Research and Innovation<br>Collins, Claire; Irish College of General Practitioners, Research |
| <b>Primary Subject Heading</b>: | General practice / Family practice                                                                                                                    |
| Secondary Subject Heading:      | Health services research                                                                                                                              |
| Keywords:                       | Telemedicine < BIOTECHNOLOGY & BIOINFORMATICS, COVID-19, PRIMARY CARE                                                                                 |
|                                 |                                                                                                                                                       |

SCHOLARONE™  
Manuscripts



I, the Submitting Author has the right to grant and does grant on behalf of all authors of the Work (as defined in the below author licence), an exclusive licence and/or a non-exclusive licence for contributions from authors who are: i) UK Crown employees; ii) where BMJ has agreed a CC-BY licence shall apply, and/or iii) in accordance with the terms applicable for US Federal Government officers or employees acting as part of their official duties; on a worldwide, perpetual, irrevocable, royalty-free basis to BMJ Publishing Group Ltd ("BMJ") its licensees and where the relevant Journal is co-owned by BMJ to the co-owners of the Journal, to publish the Work in this journal and any other BMJ products and to exploit all rights, as set out in our [licence](#).

The Submitting Author accepts and understands that any supply made under these terms is made by BMJ to the Submitting Author unless you are acting as an employee on behalf of your employer or a postgraduate student of an affiliated institution which is paying any applicable article publishing charge ("APC") for Open Access articles. Where the Submitting Author wishes to make the Work available on an Open Access basis (and intends to pay the relevant APC), the terms of reuse of such Open Access shall be governed by a Creative Commons licence – details of these licences and which [Creative Commons](#) licence will apply to this Work are set out in our licence referred to above.

Other than as permitted in any relevant BMJ Author's Self Archiving Policies, I confirm this Work has not been accepted for publication elsewhere, is not being considered for publication elsewhere and does not duplicate material already published. I confirm all authors consent to publication of this Work and authorise the granting of this licence.



1  
2  
3  
4  
5  
6  
7  
8  
9  
10  
11  
12  
13  
14  
15  
16  
17  
18  
19  
20  
21  
22  
23  
24  
25  
26  
27  
28  
29  
30  
31  
32  
33  
34  
35  
36  
37  
38  
39  
40  
41  
42  
43  
44  
45  
46  
47  
48  
49  
50  
51  
52  
53  
54  
55  
56  
57  
58  
59  
60

## How COVID-19 has affected general practice consultations and income – General Practitioner cross-sectional population survey evidence from Ireland

Robyn Homeniuk<sup>a</sup> and Claire Collins<sup>b</sup>

- a. Research Officer, Department of Research, Irish College of General Practitioners, 4-5 Lincoln Place, Dublin D2. Email: robyn.homeniuk@icgp.ie
- b. Director of Research and Innovation, Department of Research, Irish College of General Practitioners, 4-5 Lincoln Place, Dublin D2. Email: claire.collins@icgp.ie

For peer review only

## Abstract

### *Objectives*

How general practice is delivered in many countries has drastically changed due to the COVID-19 pandemic. This study aimed to answer the question of how general practice has changed in Ireland in response to COVID-19.

### *Design*

The Irish College of General Practitioners surveyed its membership before and after the global pandemic hit Ireland using a cross-sectional online survey instrument.

### *Setting*

This study focuses on primary care, specifically general practice, in Ireland.

### *Participants*

In February 2020 before the global pandemic, 526 general practices across Ireland submitted responses to the survey; 538 general practices responded to the second survey during the pandemic in June 2020. This covers 32% and 33% of practices in Ireland, respectively.

### *Main outcome measures*

The type of consultations by general practitioners and practice nurses in both surveys is the main outcome measure reported in this paper. Other changes such as the perceived change in attendance by certain patient groups and practice income are also reported.

### *Results*

Face-to-face consultations significantly ( $p < 0.001$ ) decreased from a median of 26 (IQR 21.3, 30) to a median of 8 (IQR 6, 13). GP telemedicine consultations increased ( $p < 0.001$ ) from a median of 2.4 (IQR 0, 5.33) to a median of 11.33 (IQR 6, 19). The majority of practices (80.0%) reported reduced practice profit. Respondents reported a decline in non-COVID-19 related consultations among certain patient cohorts – 90.0% for children under six years old; 77.7% for patients over 70 years.

### *Conclusions*

It is likely that the way general practice is delivered will not return to as it was before the COVID-19 pandemic and increased telemedicine can be expected. However, it is necessary to assess the impact of this shift on patient health and to assess healthcare provider and patient experience to ensure continued high-quality care and patient safety.

### *Strengths and Limitations*

- **A key strength of this study is the large number of general practitioners who engaged with the surveys. It was possible to survey a third of all practices in Ireland at both time points.**
- **Due to the large number of responding practices, data covers every county in Ireland in both the pre-COVID-19 and during COVID-19 surveys. This and the volume of responses makes our findings more generalizable.**
- **The timing of the survey was another key strength of the study, as we were able to capture clinical activity data before COVID-19 and then rapidly collect information after the initial wave of the pandemic.**

- 1  
2  
3  
4  
5  
6  
7  
8  
9  
10  
11  
12  
13  
14  
15  
16  
17  
18  
19  
20  
21  
22  
23  
24  
25  
26  
27  
28  
29  
30  
31  
32  
33  
34  
35  
36  
37  
38  
39  
40  
41  
42  
43  
44  
45  
46  
47  
48  
49  
50  
51  
52  
53  
54  
55  
56  
57  
58  
59  
60
- **One of the weaknesses of the study is the design - a self-selecting cross-sectional survey - which could have biased the responses. It was not possible to identify practices and directly match their responses from the first to the second survey.**
  - **Another weakness was that we did not collect sociodemographic information, hence it was not possible to control for deprivation levels and other factors that may affect health care utilisation.**

For peer review only

## Introduction

A cluster of 'atypical viral pneumonia' cases were diagnosed in Wuhan City, China in December 2019 [1]. By 9 January 2020, Chinese authorities found the cause of the outbreak was a novel coronavirus [2] – later named COVID-19. The WHO declared an international public health emergency [3] and by the end of February 2020, Ireland had its first case. National lockdown measures commenced in March 2020 and recommended that general practitioners (GPs) observe physical distancing, wear personal protective equipment (PPE), and use telephone triage and appointments to reduce face-to-face contact [4]. Epidemiologists globally have been monitoring the progression of this infection while governments have been developing and deploying emergency pandemic responses. The need to have global and national emergency management plans has been well-documented [3] since the outbreak of SARS in 2003. Previous outbreaks have proven that contagious diseases can put intense pressure on health systems, especially on general practice, as it is the frontline of the medical response [5]. GPs have expressed their past uncertainty about how to respond to a pandemic [5]. Indeed, in response to the H1N1 pandemic, primary care staff struggled with implementing new workflows [6]. In Ireland, comprehensive preparedness plans are in place for handling public health emergencies. These plans follow WHO [7] and ECDC [8] guidance and are coordinated by the National Public Health Emergency Team [9].

General practitioners in Ireland operate as private professionals charging patients not covered under the public system a fee per visit. The State pays GPs on a capitation basis for patients covered under the public system. Around 43% of Irish people qualify for free healthcare access either through the public system known as the General Medical Services (GMS) card (32.4%) or a GP-visit only card (10.4%); the remainder pay privately for GP visits [10]. GPs are critical to managing the increasing amount of chronic illnesses such as heart diseases, diabetes, and asthma – 80% of all visits to the GP are for chronic care management [11]. In 2015, the first step towards universal healthcare in Ireland was taken when children under 6 years old and adults over 70 years old became eligible for free GP care [11]. Patients in the latter group accounted for 25% of GP consultations and 31% of practice nurse visits in 2016 [12]. Before the start of this pandemic, general practitioners faced a heavy workload managing the majority of care needs [11], completing more than 25 consultations daily, and additional time spent on administration led to GPs working nearly 10 hours in a day [13]. The need to move more care into the community is the central point of the current healthcare strategy in Ireland [14]. Another key point in the reform strategy is to achieve universal healthcare by expanding current entitlements and moving to a preventative care model [11].

With the onset of COVID-19, the face of general practice in Ireland, as in many countries, drastically changed, with developing clinical models [15] and new consultation strategies having an impact on primary care [16]. GPs quickly noticed a decrease in the number of appointments scheduled by patients, while practice costs increased and income decreased [17]. Continuity of routine care might be at risk because of the pandemic, and the general health of the population is a key concern for primary care [16]. This paper reports on the changes experienced, particularly those in consultation delivery methods, in Irish general practice during the COVID-19 pandemic. At the beginning of February 2020, the Irish College of General Practitioners (ICGP) surveyed its membership before the global pandemic reached Irish shores. In June 2020, the ICGP again surveyed its membership regarding the impact of COVID-19 on general practice.

## Methods

1  
2  
3 In early 2020, the ICGP – the professional body for GPs in Ireland - designed an online survey to  
4 capture practice activities, stressors, and demographic details regarding general practices in Ireland.  
5 The survey was developed in order to measure general practice activity, as this information is not  
6 yet routinely collected in Ireland. It was the intention to periodically repeat the survey with ICGP  
7 members to build a dataset to enable better resource planning in primary care; however, because of  
8 the COVID-19 pandemic, a decision was taken to adjust the survey accordingly.  
9

10  
11 It was distributed to 3,378 members both before (February 2020) and during (June 2020) the  
12 coronavirus pandemic. It was not sent to trainees, retired GPs, or Irish GPs working abroad. The  
13 second survey was updated to include additional questions and response categories that specifically  
14 related to the pandemic. Before each survey was sent out, eight GPs piloted the survey. A  
15 population survey approach was taken; therefore, no additional sampling techniques were used.  
16 The responding sample was self-selecting, with the survey open for a two-week period to maximise  
17 the number of responses received.  
18  
19

20 The questionnaire was developed specifically for use in the survey. The questionnaire before the  
21 pandemic had 14 items, which covered the number of GPs and practice nurses, consultation activity  
22 and hours worked, stressors and practice demographic information. The questionnaire conducted  
23 during the pandemic had 25 items, as it gained new items pertaining to changes introduced because  
24 of COVID-19. The surveys have been included as supplemental materials (supplementary file 1 and 2  
25 respectively). Questions regarding stress, hours worked, appointment availability and pandemic  
26 response were included to obtain a better understanding of the state of general practice.  
27  
28

29 There were no eligibility criteria to complete the survey. Only one survey for each practice was  
30 requested in order to obtain cross-sectional data from Irish general practice. Ethical approval from  
31 the ICGP Research Ethics Committee for both surveys was obtained and consent from practices for  
32 participation and data processing was confirmed at the start of each survey. The online survey was  
33 fully anonymous and no IP addresses were collected.  
34  
35

36 All data is based on survey responses. Consultation rates include face-to-face consultations,  
37 telephone and video consultations (referred to as telemedicine), home visits and visits to nursing  
38 homes reported by practices who responded to the survey. Data was returned regarding the most  
39 recent working day. Out of hours services in Ireland are provided and recorded separately and hence  
40 are not included in these figures. The definitions for city, town and village are based on Central  
41 Statistics Office [18] definitions - rural is an area where less than 1,500 people live, a town has a  
42 population between 1,500 and 49,999, and cities have a population 50,000 or more.  
43  
44

45 We conducted the analysis using SPSS V25 software, using descriptive analysis. For numerical data,  
46 means and medians were used to describe and compare the data as appropriate. A  $p$ -value of  $<0.05$   
47 was used to indicate statistical significance. Mann-Whitney U tests were used to compare the  
48 number of consultations per GP or practice nurse per day; interquartile range (IQR) of the median  
49 number of consultations are given to show variance within the numbers at each time point; and chi-  
50 square tests were used for categorical variables.  
51  
52

## 53 Results

### 54 *Survey Population*

55 There were 526 responses to the pre-COVID-19 survey - 32% of all 1,635 practices in Ireland [19].  
56 Five hundred twenty-three practices responded regarding the number of full time equivalent (FTE)  
57 GPs employed at the practice, stating that 1,504.5 FTE GPs are employed at these practices. In terms  
58  
59  
60

of the number of FTE GPs working on the day on which consultation data is based, 526 practices reported a total of 1,253.9 FTE GPs (82.8%) on duty on the day. In this sample, approximately one fifth (19.4%) of the practices had 1.0 FTE GP or less employed - these are considered single-handed practices. The average number of FTE GPs at group practices was 3.3. At least one part-time practice nurse was employed across 483 practices, 93.8% of the 515 practices who responded to this question. A total of 629.5 FTE practice nurses were employed by these practices. On average, practices employed 1.2 FTE practice nurses – although 161 practices employed between 0.20 and 0.90 FTE practice nurses. In terms of nurses on duty on the day relevant to consultation data, 514 practices reported that 535.8 FTE practice nurses were working across 447 practices. There was an average of 1.0 FTE practice nurse working at each practice; 67 practices stated they had no practice nurses working on the day in question.

In terms of practice location, city practices comprised 37.5% of the total, with 43.9% of practices located in towns and 18.6% in villages. There was at least one practice recorded in every county of Ireland.

In the survey issued during the COVID-19 response, 783 practices responded, however, 240 participants only answered the first four items and five respondents did not consent for their responses to be used – ergo 538 valid responses were received. Hence, 32.9% of all practices in Ireland were represented in the during COVID-19 survey.

With regards to the total number of FTE GPs and practice nurses employed, 537 practices responded to the GP part of the question reporting 1276.5 FTE GPs employed overall and 526 practices responded to the practice nurse part of the question, reporting a total of 607.2 FTE nurses. Just 56 practices had no practice nurse employed, and 12 did not respond to this question. With respect to the number of FTE GPs and practice nurses working on the day when consultation numbers were recorded, 534 practices reported that 1,104.9 FTE GPs were working with an average of 2.1 FTE GPs at working each practice and 513 practices reported 509.0 FTE practice nurses were available, with an average of 1.0 FTE nurse working per practice.

There were slightly more single-handed practices in this responding sample at just over a quarter (29.0%). Group practices employed an average of 2.9 FTE GPs.

A total of 537 practices provided location information. City practices comprised 34.4 % (185) of the total, with 46.0% (247) of practices located in towns and 19.5% (105) in villages and at least one practice responding in every county. Practice characteristics from both surveys are shown in Table 1.

**Table 1: Practice Characteristics**

|                                    | Pre-COVID-19 | During COVID-19 |
|------------------------------------|--------------|-----------------|
| <b>Total Number of practices</b>   | 526          | 538             |
| Number of Single-Handed Practices: | 101          | 156             |
| Percent of Total:                  | 19.4%        | 29.0%           |
| Number of Group Practices:         | 422          | 382             |
| Percent of Total:                  | 80.2%        | 71.0%           |
| Number of FTE GPs Overall:         | 1,504.5      | 1,276.5         |
| Number of Respondents:             | 523          | 537             |
| Mean GPs Overall:                  | 2.9          | 2.4             |

|                                 |         |         |
|---------------------------------|---------|---------|
| Number of FTE GPs on the Day:   | 1,253.9 | 1,104.9 |
| Number of Respondents:          | 526     | 534     |
| Mean GPs on day:                | 2.40    | 2.1     |
| Practices with a PN employed:   | 483     | 463     |
| Percent of Total:               | 93.8%   | 88.0%   |
| Number of Respondents:          | 515     | 526     |
| Number of FTE PNs Overall:      | 629.5   | 607.2   |
| Number of Respondents:          | 515     | 526     |
| Mean PNs Overall:               | 1.2     | 1.2     |
| Number of FTE PNs on the day:   | 535.8   | 509.0   |
| Number of Respondents:          | 514     | 513     |
| Mean PNs on day:                | 1.0     | 1.0     |
| Practices located in a City:    | 197     | 185     |
| Percent of Total:               | 37.6%   | 34.4%   |
| Practices located in a Town:    | 231     | 247     |
| Percent of Total:               | 43.9%   | 46.0%   |
| Practices Located in a Village: | 98      | 105     |
| Percent of Total:               | 18.6%   | 19.5%   |

FTE = Full Time Equivalent, GP = General Practitioner, PN = Practice Nurse

In both surveys, practices received the questionnaire via email with one additional reminder email. The number of practices that provided valid responses, defined as providing information for overall and on the day data, was comparable. The geographic spread of the practices was similar, though there was a small increase in single-handed practices responding to the during COVID-19 survey; however, this did not have a significant impact when comparing consultation methods.

In the pre-COVID-19 survey, the proportion of missing responses ranged from 0.6% to 10.5%, the questions that had more missing responses were the number of consultations completed by practice nurses, with 6.8% and 10.5% of practices skipping these questions.

The proportion of missing answers ranged from 1.1% to 56.7% in the during COVID-19 survey. The questions that had missing answers were the financial questions, items 8 to 11, with a range of 4.5% to 56.7% practices not answering these questions.

#### *Consultations*

In the survey pre-COVID-19, items 5, 7, and 8 on the questionnaire (see supplementary file 1) asked the number of consultations GPs and practice nurses completed in person, using telemedicine, and in visits to homes and nursing homes. Overall, 36,821 GP consultations were recorded by 523 practices; 87.3% of appointments occurred face-to-face, 10.5% were telemedicine and the remainder were visits to homes and nursing homes.

During COVID-19, items 21, 22, 23, and 24 on the questionnaire (see supplementary file 2) asked practices to report the number of GP and practice nurse consultations completed in person, using telemedicine, and in visits to homes and nursing homes. The main mode of consultation changed significantly. This time, 530 practices reported 25,596 consultations. Over half of the GP consultations occurred via telemedicine (57.0%) and 41.0% occurred face-to-face with the remaining visits to homes or nursing homes. Table 2 shows the proportion of consultations by each consultation method for GPs and practice nurses at each time point.

**Table 2: Summary of Consultations**

| Consultation Method             | Pre COVID-19 Consultations | During COVID-19 Consultations |
|---------------------------------|----------------------------|-------------------------------|
| <b>GP Face-to-Face</b>          |                            |                               |
| Total consultations:            | 32,160                     | 10,484                        |
| Proportion of GP consultations  | 87.3%                      | 41.0%                         |
| Number of Respondents:          | 523                        | 530                           |
| <b>GP Telemedicine*</b>         |                            |                               |
| Total consultations:            | 3,895                      | 14,588                        |
| Proportion of GP consultations: | 10.5%                      | 57.0%                         |
| Number of Respondents:          | 508                        | 523                           |
| <b>GP home visits</b>           |                            |                               |
| Total consultations:            | 483                        | 299                           |
| Proportion of GP consultations: | 1.3%                       | 1.2%                          |
| Number of Respondents:          | 510                        | 517                           |
| <b>GP nursing home visits</b>   |                            |                               |
| Total consultations:            | 322                        | 225                           |
| Proportion of GP consultations: | 0.9%                       | 0.9%                          |
| Number of Respondents:          | 496                        | 503                           |
| <b>PN Face-to-Face</b>          |                            |                               |
| Total consultations:            | 11,417                     | 5,908                         |
| Proportion of PN consultations: | 82.4%                      | 67.6%                         |
| Number of Respondents:          | 490                        | 489                           |
| <b>PN Telemedicine*</b>         |                            |                               |
| Total consultations:            | 2,436                      | 2,828                         |
| Proportion of PN consultations: | 17.6%                      | 32.4                          |
| Number of Respondents:          | 471                        | 469                           |

\*Telemedicine consultations include video, telephone and other remote technology used. GP = General Practitioner, PN=Practice Nurse

Face-to-face appointments decreased from 87.3% to 41.0% of all GP consultations and consultations by telemedicine increased from 10.5% to 57.0% of reported consultations. Before the start of the pandemic, 12.5% of all consultations (by GPs and practice nurses) were conducted via telemedicine compared to 51.0% after the pandemic began.

Pre-COVID-19, 490 practices reported that practice nurses completed 13,853 consultations. Just under one fifth, 17.6%, of practice nurse consultations were via telemedicine and 82.4% were face-to-face. During the pandemic, 489 practices reported 8,736 practice nurse consultations. The consultations via telemedicine made up 32.4%, with the remainder conducted face to face (67.6%).

Before the pandemic began, practice nurses had a higher proportion of telemedicine appointments than GPs – 17.6% of practice nurse appointments in February 2020 compared to only 10.5% of GP appointments. During COVID-19, 57.0% of GP appointments occurred via telemedicine compared to 32.4% of practice nurse appointments. The Mann Whitney U test was used to compare GP consultations per day for each consultation method pre-COVID-19 and during COVID-19; all of the tests showed the difference was statistically significant ( $p < 0.001$ ). The same technique was used to



1  
2  
3 compare the number of consultations by practice nurses per day; this also found that the difference  
4 between pre-COVID-19 and during COVID-19 nurse consultations was statistically significant  
5 ( $p<0.001$ ). For GPs, the median number of face-to-face consultations went from 26 (IQR 21.3, 30) to  
6 a median of 8 (IQR 6, 13) during – which was a significant decline ( $p<0.001$ ). Similarly, GP  
7 consultations via telemedicine increased from a median of 2.4 (IQR 0, 5.33) to a median of 11.33  
8 (IQR 6, 19) – again this was a significant change ( $p<0.001$ ). Furthermore, the differences pre-COVID-  
9 19 and during the initial COVID-19 response for other consultation methods were all highly  
10 significant ( $p<0.001$ ).  
11  
12

13 Practices were asked in the during COVID-19 survey if they had noticed a decline in certain high  
14 traffic patient groups. Overall, there was a reported decline in non-COVID-19 related consultations.  
15 Five hundred twenty-six practices answered this question, the question was in tick-box format and  
16 practices could select any number of the options. Almost all practices – 484 practices – noticed a  
17 decline for children under six years old and 418 saw a decline for patients over 70 years (two patient  
18 groups with free GP care nationally).  
19  
20  
21

### 22 *Practice income impact*

23  
24 When practices were asked whether there had been a change in profitability since the pandemic  
25 started, 536 practices responded and 80.0% of these practices reported a decrease in profitability.  
26 This was reported by 124 single-handed practices and 305 group practices. These practices  
27 estimated they would have a 35.1% decrease in profitability on average. However, only 257 practices  
28 said they had completed a formal assessment of their profits.  
29  
30

31 More group practices completed formal account reviews assessing the change in practice income  
32 and profit - out of the 257 who had completed a formal assessment, 210 were group practices  
33 compared to just 47 single-handed practices. Single-handed practices estimated an average loss of  
34 41.5%, compared to the average estimate of 32.6% for group practices. The lower number of formal  
35 assessments by single-handed practices could explain part of this difference, through overestimates  
36 by GPs when completing the survey.  
37  
38

39 When asked what, if any, assistance measures to help the business manage the financial impact of  
40 COVID-19, had been put in place, 308 (57.9%) practices implemented one or more of the changes  
41 listed to accommodate for any lost profit. The most popular cost saving measure used was asking  
42 staff to take their annual leave early, with 27.1% of practices implementing this measure.  
43  
44

45 There were no significant relationships between practice size and implementing the listed measures.

46 Overall 233 practices (43.3%) indicated they had staff that were by reduced hours, salary, or  
47 redundancy. The most affected staff has been receptionists with 103 (19.1%) practices recording  
48 that this group had been affected in their practice. Following that, were nurses and salaried GP with  
49 83 practices (15.4%) noting each of these staff groups had been affected. Forty-six GP respondents  
50 left comments as well, most highlighting that they had been the one to reduce their personal salary  
51 for the sake of keeping their staff. Table 3 shows the proportion of practices that used the following  
52 methods to protect income during the pandemic.  
53  
54  
55  
56  
57  
58  
59  
60

**Table 3: Measures introduced to help the business manage the financial effects of COVID-19**

|                                                                                | <b>Single-Handed Practices<br/>(n=156)</b> | <b>Group Practices<br/>(n=382)</b> |
|--------------------------------------------------------------------------------|--------------------------------------------|------------------------------------|
| Have informed staff to take annual leave early                                 | Total: 22<br>Proportion: 14.1%             | Total: 124<br>Proportion: 32.4%    |
| Have asked staff to reduce their hours and work them back up later in the year | Total: 12<br>Proportion: 7.7%              | Total: 56<br>Proportion: 14.7%     |
| Have formally reduced staff hours and payment until profitability improves     | Total: 16<br>Proportion: 10.3%             | Total: 76<br>Proportion: 19.9%     |
| Have made staff redundant                                                      | Total: 15<br>Proportion: 9.6%              | Total: 37<br>Proportion: 9.7%      |
| Have applied for the employer wage subsidy scheme                              | Total: 15<br>Proportion: 9.6%              | Total: 63<br>Proportion: 16.5%     |

## Discussion

### *Principal Findings*

A shift to telemedicine was observed from 10.5% of all GP consultations and 17.6% of practice nurse consultations pre-COVID-19 to 57.0% and 32.4% respectively during the COVID-19 response.

More than half of practices saw decreases in non-COVID-19 related consultations from vulnerable patient groups. Particularly, non-COVID-19 related visits from patients under 6 and over 70 – who receive free GP care – decreased despite usually being frequent users of health services.

Finally, practices' finances have been impacted, with 80.0% reporting reduced profit. Moreover, two-fifths of practices had staff affected by redundancy, reduced hours or reduced salary as a measure to offset the financial impact of the pandemic.

### *Strengths and weaknesses of the study*

Our surveys are based on a self-selecting sample, which comes with inherent bias. We cannot undertake a direct practice-based pre and post comparison; however, key comparisons indicated that the responding samples were generally comparable. As the study design used a cross-sectional survey approach, a key limitation was the inability to determine causal relationships between the surveys. Due to the changing atmosphere caused by COVID-19, the survey questions were updated and the second iteration was longer – this difference may have caused response bias. Furthermore, we did not collect information that would allow for meaningful geographical analyses, and therefore could not account for regional and socioeconomic differences, which could affect consultation methods. Data is based on reported data and not from data extracted from general practice systems and hence may lead to under- or over-reporting. The survey was completed by one GP per practice, which could have reduced the accuracy of practice nurse consultation figures, although practice management systems allow identification of these. Additionally, we did not collect patient population information so adjustment for disability or other patient factors could not be undertaken

1  
2  
3 or compared nationally. Finally, the results assume that the national picture corresponds with that  
4 of this sample of GP practices.  
5

6 However, a strength of these surveys is the number of practices and FTE GPs represented. In the  
7 pre-COVID-19 survey, there were 1,504.5 FTE GPs represented, employed by the 526 responding  
8 practices. In the post-COVID-19 survey, 1,276.5 (n=537) FTE GPs from the 538 responding practices  
9 were represented. This means an estimated 32% and 33% respectively of all practices in Ireland  
10 were captured in each survey. While this is a reasonable response rate, it is not a majority of  
11 practices; therefore, the proportion of each consultation method is an estimate and should be  
12 considered as such in a national context.  
13  
14

15 Another strength is that the representation of both single-handed and group practices was similar to  
16 national figures [20] making the response more generalizable. And, while detailed geographical  
17 information was not collected, both samples included at least one practice in all parts of the country  
18 with more in cities such as Dublin and Cork, which is consistent with the geographical spread of  
19 practices previously reported [21].  
20  
21

### 22 *Interpretation in terms of international literature/Strengths and weaknesses compared* 23 *to other literature* 24

25 Since the beginning of the COVID-19 pandemic, there have been many changes rapidly implemented  
26 in healthcare across the world and they are having an impact on clinicians [16, 17]. Our study  
27 showed a decrease overall in general practice GP appointments (GPs and practice nurses) in the  
28 early days of the pandemic. This is similar to reports in the UK [22], where the NHS has noticed a  
29 30% decrease in the number of GP appointments compared to the same time in 2019.  
30  
31

32 Our study showed a substantial shift from 12.5% to 51.0% of GP and practice nurse consultations in  
33 Ireland delivered via telemedicine. The UK reports are varied; however, they show a similar shift to  
34 telemedicine consultations. With an overall 30% drop in all consultations, GPs reported  
35 consultations changing from 90-95% face-to-face to 85% remote [22, 23]. The current UK estimates  
36 are higher than ours; however, their telemedicine rate pre-COVID-19 was also higher [22]. Spain also  
37 reports an increase in the use of virtual consultations, at 68.3% during the pandemic [24]. The  
38 proportion of face-to-face GP consultations decreased from 87.3% to 41.0% in our study, showing a  
39 similar reduction to England where proportions changed from 70% to 23% [25].  
40  
41

42 The majority (80.2%) of our practices reported reduced practice profit, and this has been seen  
43 elsewhere with GPs in the United States of America turning to crowdfunding to help their practices,  
44 and GPs in Belgium and Australia also feeling the effects of changing remuneration during COVID-19  
45 [16, 17, 26].  
46  
47

48 Similar studies comparing the impact of COVID-19 on practice consultations are rare. Much of the  
49 literature to date on delivery type changes are based on commentaries and not actual  
50 measurements [24, 27]. However, there are a handful of recent publications about the use of  
51 healthcare during the pandemic. A recent German study with 1,095 GPs and patients aged 65 or  
52 older found that there was a 14% decrease in consultations in May 2020 compared to the same time  
53 in 2019, and the rate of diabetes, dementia, depression, cancer and stroke diagnoses decreased  
54 during this period (between -17% and -26%) [28]. In a survey of Australian GPs, 73% of practices had  
55 a reduction in bookings and 77% had a decrease in practice income; meanwhile, telephone calls  
56 (93%) and practice costs (81%) increased [17]. These results support our survey's findings that these  
57 challenges have also been experienced by GPs in Ireland. A key strength of this paper is that it adds  
58  
59  
60

1  
2  
3 to the knowledge base in terms of the potential impact of the COVID-19 pandemic on general  
4 practice in the current void of such literature.  
5

### 6 *Implications for practice* 7

8 GPs are motivated by altruism to work during pandemics despite the high personal risk, and they are  
9 enthusiastic about further training and information [5]. However, despite preparedness planning,  
10 implementing pandemic policies faces multiple obstacles [5]. GPs are facing rapidly changing patient  
11 flows, clinical algorithms, new care pathways, and the need for new ways of delivering high-quality  
12 care [16, 17, 24, 27, 28, 29]. Irish GPs have implemented many changes during the COVID-19  
13 pandemic. The RACGP recommends 'a planned and coordinated approach' when implementing a  
14 telehealth service [30]; however, due to the urgent nature of the current situation, this has not been  
15 possible. Maintaining the quality of healthcare is important in sustaining a healthy workforce, which  
16 is essential to support a healthy economy during and after the pandemic.  
17  
18

19 Ireland, like many other countries, has taken massive steps towards the regular use of remote  
20 consultations, seemingly overnight, with previous trepidation regarding continuity of care and safety  
21 falling away out of necessity [16, 29]. The rapid national adoption of telemedicine consultations as  
22 well as electronic prescribing has presented opportunity; however, GPs are concerned that without  
23 as much face-to-face contact, critical non-verbal communication is missing from consultations and in  
24 some cases, telephone consults are insufficient to address patient concerns [16].  
25  
26

27 Ireland has two health strategies promoting the use of technology to enable patient-centred care  
28 nationally. Sláintecare, the current healthcare strategy in Ireland, aims to establish a national health  
29 fund that will help deliver universal healthcare and introduce comprehensive eHealth infrastructure  
30 [11]. This strategy supported the 2013 eHealth strategy, which had an objective of more affordable  
31 and more personalised care for all by capitalising on technology [31]. During the pandemic, practices  
32 across the country have swiftly transitioned to using technology such as a secure email facility  
33 between health care providers (Healthmail), e-prescribing, and telemedicine (video and telephone)  
34 consultations. Before the COVID-19 pandemic began, clinicians in primary care had used  
35 telemedicine interventions [29], but not extensively. Changes adopted during this pandemic  
36 accelerated the digitalisation of healthcare [29]. This could lead the way to the lasting adoption of  
37 technology such as e-prescribing and telephone and video consultations after the pandemic.  
38  
39

40  
41 Telemedicine has been viewed as a way to lower costs and see more patients [32, 33, 34] but was  
42 rare in Irish general practice up to now, and here, as elsewhere, there was some resistance and  
43 concern [16]. However, the current COVID-19 pandemic has resulted in telemedicine consultations  
44 being recommended for all GPs [4]. Patients, like health care workers, have adapted to telemedicine  
45 consultations being the standard method of consultation; previous studies found that patients found  
46 video consultations acceptable [32] but age (over 60) and computer proficiency were found to  
47 negatively impact a patient's view of acceptability [33, 34]. Telemedicine has been invaluable during  
48 the outbreak of COVID-19, as it has enabled routine care to continue to some degree; however,  
49 patients who are digitally disadvantaged are often from populations already experiencing greater  
50 health risks - such as older people and those in lower socioeconomic classes [32, 34]. Going forward,  
51 special attention must be given to reducing health inequalities exacerbated by recent changes in  
52 care.  
53  
54  
55  
56

57 Furthermore, a noted decrease in consultations for non-COVID related symptoms has been observed  
58 in our survey. Patients who are most vulnerable, such as people over 65, have also been avoiding  
59  
60

1  
2  
3 seeking care in other countries [16, 26, 28]. This could have serious impacts on health outcomes and  
4 patient safety with calls on patients not to self-diagnose or delay seeking treatment [16, 26, 28].  
5 Patients are also changing the way they use health services, with more emphasis on self-care [16, 24,  
6 28]. However, not all patients will have the same capacity for caring for their health without the level  
7 of support a GP or practice nurse can provide with face-to-face consultations. More research on  
8 patient and physician satisfaction and whether health outcomes are impacted by consultation types  
9 is needed to develop guidelines and policies on how frequently remote consultations can be used.  
10 Patient feedback will be invaluable for maintaining lasting benefits.  
11  
12

13 The COVID-19 pandemic has the potential to change general practice forever, and this does not only  
14 apply in Ireland but has been noted elsewhere [15, 16, 17, 22, 24, 28]. The adoption of ‘total triage’  
15 systems has been seen during this pandemic whereby GPs can decide the mode of follow-up  
16 consultation, whether that is face-to-face, video call or telephone. As we look to a post-COVID  
17 landscape, there is a case for general practice retaining this to allow more flexibility in how  
18 consultations are delivered according to the needs and preferences of patients. However, telephone  
19 triage does not reduce GP workload, so we need to evaluate the impacts on workload and patient-  
20 centred care [16, 32, 33, 34]. While it is unlikely that we will maintain this level of telemedicine  
21 consultations, it is expected that how general practice functions will not return to as it was before  
22 [29, 35].  
23  
24  
25

26 However, we should not lose sight of the relationship between the GP and patient and the  
27 importance of good communication and trust [16, 26, 27, 29, 32, 33]. Telemedicine does not work  
28 for all patients or health problems, and there is a need to establish what works best for different  
29 patients [16, 27, 32, 33, 34]. We need to evaluate the impact on patient experience, health  
30 inequalities and patient-centred care [33, 36].  
31  
32

33 Since the beginning of June 2020, renewed efforts have been made to reassure and encourage the  
34 public to continue seeking medical advice from their GPs by making an appointment [36].  
35

#### 36 *Unanswered questions and future research*

37  
38 How general practice is delivered will not return to as before; increased telemedicine is likely. It is  
39 necessary to assess the impact of this shift on patient health and to assess healthcare provider and  
40 patient experience to ensure continued high-quality care and patient safety. Furthermore, we need  
41 to understand the impact of changing work requirements and evolving consultation techniques on  
42 general practice workload and practice income and viability.  
43  
44

#### 45 **DECLARATIONS**

##### 46 *Abbreviations*

47 ECDC – European Centre for Disease Prevention and Control

48 ESRI – Economic and Social Research Institute

49 FTE – Full time equivalent

50 GP - General Practitioner

51 HSE - Health Service Executive

52 ICGP - Irish College of General Practitioners

53 NHS – National Health Service (UK)

1  
2  
3 PN - Practice Nurse

4  
5 PPE – Personal protective equipment

6  
7 RACGP – Royal Australian College of General Practitioners

8  
9 WHO - World Health Organisation

## 10 11 12 **Copyright**

13  
14 The Corresponding Author has the right to grant on behalf of all authors and does grant on behalf of  
15 all authors, an exclusive licence (or non exclusive for government employees) on a worldwide basis  
16 to the BMJ Publishing Group Ltd to permit this article (if accepted) to be published in BMJ editions  
17 and any other BMJPGJL products and sublicenses such use and exploit all subsidiary rights, as set out  
18 in our licence.  
19  
20

## 21 22 **Competing interests**

23 All authors have completed the *Unified Competing Interest form* (available on request from the  
24 corresponding author) and declare: no financial relationships with any organisations that might have  
25 an interest in the submitted work in the previous three years, no other relationships or activities that  
26 could appear to have influenced the submitted work.  
27  
28

## 29 30 **Ethics approval and consent to participate**

31 Ethical approval was obtained for the study from the Irish College of General Practitioners Research  
32 Ethics Committee.  
33

## 34 35 **Public and patient involvement**

36 Patents and members of the public were not involved in this research because it was not relevant to  
37 the study questions. The study focused on changes experienced by general practitioners. General  
38 practitioners were involved in the study design as members of the ICGP Board who approved and  
39 oversaw the project.  
40

## 41 42 **Consent for publication**

43 Not applicable.  
44

## 45 46 **Availability of data and materials**

47 The data is available on reasonable request to the corresponding author.  
48  
49  
50  
51  
52  
53  
54  
55  
56  
57  
58  
59  
60

### **Funding**

The project was in part supported via a Quality Improvement Grant from Pfizer under its Global Medical Grants (reference #6216072). The funder had no role in project design, data collection, analysis, interpretation or reporting.

### **Authors' contributions**

CC was the project principal investigator. She conceived the project idea, designed the questionnaire, undertook the data collection, obtained the funding, supervised the data analysis and contributed to the paper.

RH was the project research assistant. She analysed the data, undertook the analysis and contributed to the paper.

Both authors have read and approved the final paper.

Name of guarantor: Claire Collins.

### **Transparency declaration**

The authors affirm that the manuscript is an honest, accurate, and transparent account of the study being reported; that no important aspects of the study have been omitted; and that any discrepancies from the study as planned (and, if relevant, registered) have been explained.

### **Acknowledgements**

The authors wish to acknowledge the valuable contribution and time given by all participants. Dr. Jean Saunders, affiliated with CSCS Ireland, statistical advice on the paper is noted and appreciated.

### **References**

1. WHO Newsroom. *Timeline of WHO's response to COVID-19*. [Internet] Geneva: World Health Organisation; 29 June 2020 [updated 30 July 2020]. Available from: <https://www.who.int/china/news/detail/09-01-2020-who-statement-regarding-cluster-of-pneumonia-cases-in-wuhan-china> [Accessed 24<sup>th</sup> August 2020]
2. WHO. *WHO Statement regarding cluster of pneumonia cases in Wuhan, China*. [Internet] Geneva: World Health Organisation; 9 January 2020. Available from: <https://www.who.int/china/news/detail/09-01-2020-who-statement-regarding-cluster-of-pneumonia-cases-in-wuhan-china> [Accessed 24<sup>th</sup> August 2020]
3. WHO. *WHO Director-General's statement on IHR Emergency Committee on Novel Coronavirus (2019-nCoV)*. [Internet] Geneva: World Health Organisation; 30 January 2020. Available from: [https://www.who.int/dg/speeches/detail/who-director-general-s-statement-on-ih-er-emergency-committee-on-novel-coronavirus-\(2019-ncov\)](https://www.who.int/dg/speeches/detail/who-director-general-s-statement-on-ih-er-emergency-committee-on-novel-coronavirus-(2019-ncov)) [Accessed 24<sup>th</sup> August 2020]
4. HSE/HPSC. *Guiding principles for Infection Prevention and Control when returning to routine General Practice during pandemic v2.1*. [Internet] Dublin: Health Protection Surveillance Centre; 10 July 2020. Available from: <https://www.hpsc.ie/a-z/respiratory/coronavirus/novelcoronavirus/guidance/primarycareguidance/adviseriskassessmentandmanagementofpatients/Guiding%20principles%20IPC%20GP.pdf> [Accessed 24<sup>th</sup> August 2020]

- 1
  - 2
  - 3
  - 4
  - 5
  - 6
  - 7
  - 8
  - 9
  - 10
  - 11
  - 12
  - 13
  - 14
  - 15
  - 16
  - 17
  - 18
  - 19
  - 20
  - 21
  - 22
  - 23
  - 24
  - 25
  - 26
  - 27
  - 28
  - 29
  - 30
  - 31
  - 32
  - 33
  - 34
  - 35
  - 36
  - 37
  - 38
  - 39
  - 40
  - 41
  - 42
  - 43
  - 44
  - 45
  - 46
  - 47
  - 48
  - 49
  - 50
  - 51
  - 52
  - 53
  - 54
  - 55
  - 56
  - 57
  - 58
  - 59
  - 60
5. Patel MS, Phillips CB, Pearce C, Kljakovic M, Dugdale P, Glasgow N. General practice and pandemic influenza: a framework for planning and comparison of plans in five countries. *PLoS One* 2008 May 28;3(5):e2269.
6. Kunin M, Engelhard D, Thomas S, Ashworth M, Piterman L. Challenges of the Pandemic Response in Primary Care during Pre-Vaccination Period: A Qualitative Study. *Isr.J.Health.Policy.Res.* 2015 Oct 15;4:32-015-0028-5. eCollection 2015.
7. WHO. *2019 Novel Coronavirus (2019-nCoV): Strategic Preparedness and Response Plan*. [Internet] Geneva: World Health Organisation; 2020 [Draft as of 3 February 2020]. Available from: <https://www.who.int/docs/default-source/coronaviruse/srp-04022020.pdf?ua=1> [Accessed 24<sup>th</sup> August 2020]
8. European Centre for Disease Prevention and Control. *Infection prevention and control for COVID-19 in healthcare settings – Fourth update*. [Internet] 3 July 2020. ECDC: Stockholm; 2020. Available from: <https://www.ecdc.europa.eu/en/publications-data/infection-prevention-and-control-and-preparedness-covid-19-healthcare-settings> [Accessed 25<sup>th</sup> August 2020]
9. NPHE. *National Public Health Emergency Team (NPHE) COVID-19 Subgroup : Guidance and Evidence Synthesis*. [Internet] Dublin: Department of Health; 6 May 2020 [Last updated 4 August 2020]. Available from: <https://www.gov.ie/en/collection/07d750-nphet-covid-19-subgroup-guidance-and-evidence-synthesis/> [Accessed 25<sup>th</sup> August 2020]
10. HSE. *Primary Care Reimbursement Service Statistical Analysis of Claims and Payments 2019*. [Internet] Dublin: Health Care Executive Primary Reimbursement Service; 2020. Available from: <https://www.hse.ie/eng/staff/pdrs/pdrs-publications/annual-report-2019.pdf> [Accessed 25<sup>th</sup> August 2020]
11. Committee on the Future of Healthcare. *Sláintecare Report*. [Internet] Dublin: Houses of the Oireachtas; May 2017. Available from: <https://www.gov.ie/pdf/?file=https://assets.gov.ie/165/270718095030-1134389-Slaintecare-Report-May-2017.pdf#page=1> [Accessed 25<sup>th</sup> August 2020]
12. Department of Health. *Sláintecare Action Plan 2019*. [Internet] Dublin: Department of Health; 2019. Available from: <https://assets.gov.ie/22606/4e13c790cf31463491c2e878212e3c29.pdf> [Accessed 28<sup>th</sup> August 2020]
13. Crosbie B, O'Callaghan ME, O'Flanagan S, Brennan D, Keane G, Behan W. A real-time measurement of general practice workload in the Republic of Ireland: a prospective study. *Br.J.Gen.Pract.* 2020 Jun 25;70(696):e489-e496.
14. Department of Health. *Health Service Capacity Review 2018 Executive Report: Review of Health Demand and Capacity Requirement in Ireland to 2031 – Findings and Recommendations*. London: PA Knowledge Limited; 2018. Available from: <https://assets.gov.ie/10131/5bb5ff12463345bbac465aaf02a2333d.pdf> [Accessed 25<sup>th</sup> August 2020]
15. Liu Y, Wang Z, Ren J, Tian Y, Zhou M, Zhou T, et al. A COVID-19 Risk Assessment Decision Support System for General Practitioners: Design and Development Study. *J.Med.Internet Res.* 2020 Jun 29;22(6):e19786.
16. Verhoeven V, Tsakitidis G, Philips H, Van Royen P. Impact of the COVID-19 pandemic on the core functions of primary care: will the cure be worse than the disease? A qualitative interview study in Flemish GPs. *BMJ Open* 2020 Jun 17;10(6):e039674-2020-039674.



17. Kippen R, O'Sullivan B, Hickson H, Leach M, Wallace G. A national survey of COVID-19 challenges, responses and effects in Australian general practice. *Aust J Gen Pract.* 2020 Nov;49(11):745-751. doi: 10.31128/AJGP-06-20-5465.
18. CSO. *CSO Statistical Release: Population and Migration Estimates.* [Internet] Cork: Central Statistics Office; April 2019. Available from: <https://www.cso.ie/en/releasesandpublications/er/pme/populationandmigrationestimate/sapril2019/> [Accessed 25<sup>th</sup> August 2020]
19. HSE. *Medical Workforce Planning: Future Demand for General Practitioners 2015-2025.* [Internet] Dublin: National Doctor Training and Planning, HR Directorate, Health Service Executive; September 2015. Available from: <https://www.hse.ie/eng/staff/leadership-education-development/met/plan/gp-medical-workforce-planning-report-sept-2015.pdf> [Accessed 25<sup>th</sup> August 2020]
20. O'Kelly M, Teljeur C, O'Kelly F, Ni Shulleabhain A, O'Dowd T. *Structure of General Practice in Ireland 1982 – 2015.* [Internet] Dublin: Trinity College Dublin/Irish College of General Practitioners; 2016. Available from: [https://www.tcd.ie/medicine/public\\_health\\_primary\\_care/assets/pdf/structure-of-general-practice-2016.pdf](https://www.tcd.ie/medicine/public_health_primary_care/assets/pdf/structure-of-general-practice-2016.pdf) [Accessed 28<sup>th</sup> August 2020]
21. Smith S, Walsh B, Wren M, Barron S, Morgenroth E, Eighan J, et al. *Geographic profile of healthcare needs and non-acute healthcare supply in Ireland.* ESRI Research Series: 90. [Internet] Dublin: The Economic and Social Research Institute; July 22 2019. Available from: [https://www.esri.ie/system/files/publications/RS90\\_0.pdf](https://www.esri.ie/system/files/publications/RS90_0.pdf) [Accessed 28<sup>th</sup> August 2020]
22. The Health Foundation. *How might COVID-19 affected people's ability to see their GP? COVID-19 Chart Series.* [Internet] London: The Health Foundation; 1 May 2020. Available from: <https://www.health.org.uk/news-and-comment/charts-and-infographics/how-might-covid-19-have-affected-peoples-ability-to-see-GP> [Accessed 25<sup>th</sup> August 2020]
23. NHS. Letter to: Chief executives of all NHS trusts and foundation trusts; CCG Accountable Officers; GP practices and Primary Care Networks; Providers of community health services; NHS 111 providers. *IMPORTANT - FOR ACTION - SECOND PHASE OF NHS RESPONSE TO COVID19.* From the Chief Executive Sir Simon Stevens & Chief Operating Officer Amanda Pritchard. [Internet] London: NHS; 29 April 2020. Available from: <https://www.england.nhs.uk/coronavirus/wp-content/uploads/sites/52/2020/04/second-phase-of-nhs-response-to-covid-19-letter-to-chief-execs-29-april-2020.pdf> [Accessed 25<sup>th</sup> August 2020]
24. Munoz MA, Lopez-Grau M. Lessons learned from the approach to the COVID-19 pandemic in urban primary health care centres in Barcelona, Spain. *Eur.J.Gen.Pract.* 2020 Dec;26(1):106-107.
25. RCGP. *General practice in the post Covid world: Challenges and opportunities for general practice.* [Internet] London: Royal College of General Practitioners; 2020. Available from: <https://www.rcgp.org.uk/-/media/Files/News/2020/general-practice-post-covid-rcgp.ashx?la=en> [Accessed 25<sup>th</sup> August 2020]
26. Rubin R. COVID-19's Crushing Effects on Medical Practices, Some of Which Might Not Survive. *JAMA* 2020 Jun 18.
27. de Sutter A, Llor C, Maier M, Mallen C, Tatsioni A, van Weert H, et al. Family medicine in times of 'COVID-19': A generalists' voice. *Eur.J.Gen.Pract.* 2020 Dec;26(1):58-60.

- 1  
2  
3  
4  
5  
6  
7  
8  
9  
10  
11  
12  
13  
14  
15  
16  
17  
18  
19  
20  
21  
22  
23  
24  
25  
26  
27  
28  
29  
30  
31  
32  
33  
34  
35  
36  
37  
38  
39  
40  
41  
42  
43  
44  
45  
46  
47  
48  
49  
50  
51  
52  
53  
54  
55  
56  
57  
58  
59  
60
28. Michalowsky B, Hoffmann W, Bohlken J, Kostev K. Effect of the COVID-19 Lockdown on Disease Recognition and Utilization of Healthcare Services in the Older Population in German: A Cross-sectional Study. *Age and Ageing*. 2020.
  29. Marshall M, Howe A, Howsam G, Mulholland M, Leach J. COVID-19: a danger and an opportunity for the future of general practice. *Br.J.Gen.Pract.* 2020 May 28;70(695):270-271.
  30. RACGP. *Implementation guidelines for video consultations in general practice: A telehealth initiative*. 3<sup>rd</sup> Edition. [Internet] East Melbourne Victoria: The Royal Australian College of General Practitioners; September 2012. Available from: <https://www.racgp.org.au/download/Documents/Telehealth/videoconsultguidelinesv3.pdf> [Accessed 25th August 2020]
  31. HSE/Department of Health. *eHealth Strategy for Ireland*. [Internet] Dublin: Department of Health; 2013. Available from: <https://www.gov.ie/en/publication/6b7909-ehealth-strategy-for-ireland/> [Accessed 25<sup>th</sup> August 2020]
  32. Thiyagarajan A, Grant C, Griffiths F, Atherton H. Exploring patients' and clinicians' experiences of video consultations in primary care: a systematic scoping review. *BJGP open*. 2020;4(1).
  33. Johnston S, MacDougall M, McKinstry B. The use of video consulting in general practice: semi-structured interviews examining acceptability to patients. *BMJ Health & Care Informatics* 2016;23:doi: 10.14236/jhi.v23i2.141
  34. Gilligan P, Bennett A, Houlihan A, Padki A, Owen N, Morris D, et al. The Doctor Can See You Now: A Key Stakeholder Study Into The Acceptability Of Ambulance Based Telemedicine. *Ir.Med.J.* 2018 Jun 7;111(6):769.
  35. Thornton J. Covid-19: how coronavirus will change the face of general practice forever. *BMJ* 2020 Mar 30;368:m1279.
  36. HSE. *Coronavirus: Get urgent medical help for non-coronavirus symptoms*. [Internet] 5 June 2020. Available from: <https://www2.hse.ie/conditions/coronavirus/get-urgent-medical-help-for-non-coronavirus-symptoms.html> [Accessed 25th August 2020]



## Practice Activity January 2020

### Practice Activity

**There has been a lot of media discussion regarding general practice and the ICGP would be grateful for your assistance in providing strong evidence so that we can inform this discussion and advocate on your behalf.**

**We fully appreciate that you are all very busy and we have kept the information requested to a minimum. We are asking for only one reply per practice - and this could be completed by any staff member. We have not made any questions mandatory. Of course, we hope you will complete as many as possible with the key questions relating to the number of consultations in the practice and the number of GPs and PNs on duty on the chosen day in the practice.**

**You can choose any typical working day - this could be yesterday or tomorrow - on which to provide data.**

**This survey should take about 5 minutes to complete. Thank you for taking time out of your already busy schedule to contribute data to inform this discussion and ensure accurate information is available directly from general practice.**

### **Dr. Tony Cox, ICGP Medical Director**

\* 1. I confirm that I have read the introductory information and email invitation for this survey.

I consent to my data being used as part of this survey and any publications as a result of the findings.

I understand that my data will be retained on a secure server and for a short period will be held on a server located outside the E.U.

Data will only be held until the research is completed and it will then be deleted.

Yes I consent to the above

No I do not consent to the above, click DONE at end of survey to exit.

2. Please complete this survey in respect of any day in the surgery this week. Which day are you including data for:

- Monday  
 Tuesday  
 Wednesday  
 Thursday  
 Friday

3. How many staff (GPs and Practice Nurses) were on duty on the day you are completing this survey? Please note we are asking for full time equivalents here so if someone worked half a day that is 0.5 FTE. Please enter number in decimal format.

FTE GPs

FTE Practice Nurses

4. How many FTEs in the practice overall? Please note we are asking for full time equivalents here so if a PN usually works three days per week that is 0.6 FTE. Please enter in decimal format.

FTE GPs

FTE Practice Nurses

5. How many face to face consultations were seen in the surgery in total on the day in question: please enter in whole number format.

By GPs

By PNs

6. Do you usually leave some appointments free to accommodate urgent/same day appointments?

- Yes  No

7. How many telemedicine consultations were seen on the day in question: please enter in whole number format.

By GPs

By PNs

8. How many visits by GPs were made on the day in question? Please enter in whole number format.

To homes

To nursing homes

1 9. On the day in question: how many hours in total did you personally work in the practice (clinical and non-  
2 clinical hours)? If you are not a GP and are completing it on behalf of the practice, please leave this question  
3 blank. Please enter in decimal format e.g. 0.5 or 2.0  
4

6  
7  
8 10. What is the average waiting time to get a NON-URGENT appointment in your practice? Please enter in  
9 whole number format e.g. 0 or 4 etc.

10 For adults \_\_\_\_\_ days

12 For children \_\_\_\_\_ days

14  
15  
16 11. Is your practice closed to taking new patients?

17  
18 Yes

No

19 GMS

20  
21 Private

22  
23  
24 12. Is your practice located in

25  A City

26  A Town

27  A Village

28  
29  
30  
31  
32 13. Please indicate where your practice is located:

33  
34  
35  
36  
37 14. What is **the most significant** stressor for GPs at the moment? Please tick only one answer.

38  Income

39  Locums

40  Workload

41  Work/Life balance

42  Regulations

43  Litigation risk

44  Other (please specify)



## Practice Survey on COVID-19 Changes May/June 2020

### Practice Survey on COVID-19 Changes May/June 2020

**The ICGP would be grateful for your assistance in providing strong evidence so that we can inform discussions around practice changes during COVID-19 and the supports needed going forward for general practice.**

**We are asking for only one reply per practice - and this could be completed by any staff member.**

**We have tried to keep the information requested to a minimum but also to cover all areas so as a result the survey here will take you less than 10 minutes. We have not made any questions mandatory except the Q1 re consent. Of course, we hope you will complete as many as possible.**

**Thank you for taking the time to contribute data to inform this discussion and ensure accurate information is available from general practice.**

\* 1. I confirm that I have read the introductory information and email invitation for this survey.

I consent to my data being used as part of this survey and any publications as a result of the findings.

I understand that my data will be retained on a secure server and for a short period will be held on a server located outside the E.U.

Data will only be held until the research is completed and it will then be deleted.

- Yes I consent to the above (ticking this is a requirement to proceed)
- No I do not consent to the above, click DONE at end of survey to exit.



## Practice Survey on COVID-19 Changes May/June 2020

2. Is your practice located in

- A City
- A Town
- A Village

3. Please indicate where your practice is located:

4. How many FTEs GPs and Practice Nurses currently work in the practice overall? Please note we are asking for full time equivalents here so if a PN usually works three days per week that is 0.6 FTE. Please enter in DECIMAL format.

FTE GPs

FTE Practice Nurses



## Practice Survey on COVID-19 Changes May/June 2020

### Practice Changes

5. How has teamwork in the practice changed compared to before the COVID-19 changes?

- Very increased teamwork amongst the practice team
- Increased teamwork amongst the practice team
- Remained the same
- Decreased teamwork amongst the practice team
- Very decreased teamwork amongst the practice team

6. How has connectivity with other service providers (Consultants/Pharmacists) in general changed compared to before COVID-19?

|             | Very increased connectivity | Increased connectivity | Remained the same     | Decreased connectivity | Very decreased connectivity |
|-------------|-----------------------------|------------------------|-----------------------|------------------------|-----------------------------|
| Consultants | <input type="radio"/>       | <input type="radio"/>  | <input type="radio"/> | <input type="radio"/>  | <input type="radio"/>       |
| Pharmacists | <input type="radio"/>       | <input type="radio"/>  | <input type="radio"/> | <input type="radio"/>  | <input type="radio"/>       |

Other (please specify)

7. How is the COVID-19 pandemic affecting the practice you work in terms of profitability?

- Practice profit has improved
- No change in practice profit
- Practice profit has decreased
- I don't know if the practice profit has changed



1 8. If change noted, have you or someone else in your practice had the opportunity to do a formal comparison  
2 between your current business performance now compared to the first 2 months of 2020 or this time last year  
3 or is the above based on anecdotal evidence?  
4

5  Yes, we have conducted a formal assessment

6  No, based on anecdotal or informal evidence  
7  
8  
9

10 9. If change noted, what percentage increase or decrease do you anticipate?

11  
12 0% Overall percentage change 100%  
13    
14  
15  
16

17 10. Has the practice you work in introduced any of the following measures to help the business manage the  
18 financial effects of COVID-19? Please tick all that apply.  
19

20  Have informed staff to take annual leave early

21  Have asked staff to reduce their hours and work them back up later in the year

22  Have formally reduced staff hours and payment until profitability improves

23  Have made staff redundant

24  Have applied for the employer wage subsidy scheme  
25  
26  
27  
28  
29

30 11. If the practice you work in has made redundancies or reduced salaries/hours which of the following  
31 possible staff groups have been affected? Please tick all that apply.  
32

33  Cleaners

34  Healthcare assistants

35  Practice nurses

36  Advanced nurse practitioners

37  Practice managers

38  Receptionists

39  Salaried GPs

40  Other (please specify)  
41  
42  
43  
44  
45  
46  
47  
48  
49  
50  
51  
52  
53  
54  
55  
56  
57  
58  
59  
60

## 12. What physical/consulting changes have been noticed in your practice? Please tick all that apply.

- Patients waiting outside/in car
- Triage before entering
- Limiting number of patients in waiting room
- No longer use waiting room
- Increased infection control practices
- Structural changes to reception and waiting area
- Telephone triage
- Completely managing 1st presentation fo new problem by phone
- Video consultations
- Increased use of healthmail
- Repeat prescription approach in terms of patient attending practice
- Using e-script
- Using healthmail for prescriptions
- Other (please specify)

13. Are you currently providing the following services for your patients?

|                                                                                                     | Yes                   | No                    |
|-----------------------------------------------------------------------------------------------------|-----------------------|-----------------------|
| Face-to-face assessment for patients with symptoms who may have COVID                               | <input type="radio"/> | <input type="radio"/> |
| Face-to-face assessment for urgent medical conditions non-COVID related                             | <input type="radio"/> | <input type="radio"/> |
| Face-to-face consultations for bloods only for those with chronic conditions                        | <input type="radio"/> | <input type="radio"/> |
| Face-to-face consultations for full consult for those with chronic conditions                       | <input type="radio"/> | <input type="radio"/> |
| Childhood immunisations                                                                             | <input type="radio"/> | <input type="radio"/> |
| Face-to-face antenatal care                                                                         | <input type="radio"/> | <input type="radio"/> |
| Video consultations                                                                                 | <input type="radio"/> | <input type="radio"/> |
| Safety bloods for those on long-term medication if these are recommended e.g. lithium, methotrexate | <input type="radio"/> | <input type="radio"/> |

14. Are you able to access the following in your area without referral to emergency department?

|                     | Yes, similar to before | Yes, increased access | Yes, reduced access   | No access             | Don't Know            |
|---------------------|------------------------|-----------------------|-----------------------|-----------------------|-----------------------|
| Chest x-ray         | <input type="radio"/>  | <input type="radio"/> | <input type="radio"/> | <input type="radio"/> | <input type="radio"/> |
| Ultrasound          | <input type="radio"/>  | <input type="radio"/> | <input type="radio"/> | <input type="radio"/> | <input type="radio"/> |
| Hospital phlebotomy | <input type="radio"/>  | <input type="radio"/> | <input type="radio"/> | <input type="radio"/> | <input type="radio"/> |

## 15. Has your local hospital service provided you with pathways to access the following services?

|                                                                            | Yes                   | No                    | Don't Know            |
|----------------------------------------------------------------------------|-----------------------|-----------------------|-----------------------|
| Early cancer referral for suspected breast cancer                          | <input type="radio"/> | <input type="radio"/> | <input type="radio"/> |
| Early cancer referral for suspected lung cancer                            | <input type="radio"/> | <input type="radio"/> | <input type="radio"/> |
| Early referral for suspected prostate cancer                               | <input type="radio"/> | <input type="radio"/> | <input type="radio"/> |
| Urgent gynaecology access without referral to the emergency department     | <input type="radio"/> | <input type="radio"/> | <input type="radio"/> |
| Urgent cardiac services without referral to the emergency department       | <input type="radio"/> | <input type="radio"/> | <input type="radio"/> |
| Urgent TIA assessment service without referral to the emergency department | <input type="radio"/> | <input type="radio"/> | <input type="radio"/> |

## 16. Has your local hospital service provided you with out-patient pathways for those with chronic conditions at the more severe end of the disease who require combined GP and consultant led care?

|                         | Yes                   | No                    | Don't Know            |
|-------------------------|-----------------------|-----------------------|-----------------------|
| Diabetes                | <input type="radio"/> | <input type="radio"/> | <input type="radio"/> |
| Heart failure           | <input type="radio"/> | <input type="radio"/> | <input type="radio"/> |
| Ischaemic heart disease | <input type="radio"/> | <input type="radio"/> | <input type="radio"/> |
| COPD                    | <input type="radio"/> | <input type="radio"/> | <input type="radio"/> |
| Asthma                  | <input type="radio"/> | <input type="radio"/> | <input type="radio"/> |

17. Has your local hospital service provided you with access to paediatric assessment in terms of any of the following?

|                                                                                                                                                                       | Yes                   | No                    | Don't Know            |
|-----------------------------------------------------------------------------------------------------------------------------------------------------------------------|-----------------------|-----------------------|-----------------------|
| Access to assessment for acute paediatric non-COVID medical conditions without the need to go to ED                                                                   | <input type="radio"/> | <input type="radio"/> | <input type="radio"/> |
| Pathways for paediatric outpatient referral for those who require consultant input for new diagnoses                                                                  | <input type="radio"/> | <input type="radio"/> | <input type="radio"/> |
| Pathways for paediatric outpatient for those with existing chronic medical conditions that require combined GP and consultant led care e.g. cystic fibrosis, diabetes | <input type="radio"/> | <input type="radio"/> | <input type="radio"/> |

18. Would you support the development of clearly defined care pathway between GP/community and acute services using an electronic/online system?

Yes  No  Don't Know

19. How busy is your practice overall now compared to pre-COVID-19?

Less busy  The same  Busier

20. Thinking about the last day of work this week in the practice - How many staff (GPs and Practice Nurses) were on duty on the day? Please note we are asking for full-time equivalents here so if someone worked half a day that is 0.5 FTE. Please enter answer in DECIMAL format.

FTE GPs

FTE Practice Nurses

21. How many face-to-face consultations were there on the last day in the practice? Please enter in WHOLE number format.

By GPs

By PNs

1 22. How many video consultations were there on the day in question? Please enter in WHOLE number  
2 format.

3  
4 By GPs

5  
6 By PNs

7  
8  
9 23. How many telemedicine consultations were there on the day in question? Please enter in WHOLE number  
10 format.

11  
12 By GPs

13  
14 By PNs

15  
16  
17 24. How many visits by GPs were made on the day in question? Please enter in WHOLE number format.

18  
19 To homes

20  
21 To nursing homes

22  
23 25. Overall, have you seen a decline in non-COVID-19 related consultations from any of the following? Please  
24 tick all that apply.

25  
26  Under 6's

27  
28  Over 70's

29  
30  Patients with chronic conditions

31  
32  Patients with mental health concerns

## STROBE Statement—checklist of items that should be included in reports of observational studies

|                              | Item No | Recommendation                                                                                                                                                                                                                                                                                                                                                                                                                                                         | Page No |
|------------------------------|---------|------------------------------------------------------------------------------------------------------------------------------------------------------------------------------------------------------------------------------------------------------------------------------------------------------------------------------------------------------------------------------------------------------------------------------------------------------------------------|---------|
| <b>Title and abstract</b>    | 1       | (a) Indicate the study's design with a commonly used term in the title or the abstract                                                                                                                                                                                                                                                                                                                                                                                 | 1       |
|                              |         | (b) Provide in the abstract an informative and balanced summary of what was done and what was found                                                                                                                                                                                                                                                                                                                                                                    | 2       |
| <b>Introduction</b>          |         |                                                                                                                                                                                                                                                                                                                                                                                                                                                                        |         |
| Background/rationale         | 2       | Explain the scientific background and rationale for the investigation being reported                                                                                                                                                                                                                                                                                                                                                                                   | 4       |
| Objectives                   | 3       | State specific objectives, including any prespecified hypotheses                                                                                                                                                                                                                                                                                                                                                                                                       | 4       |
| <b>Methods</b>               |         |                                                                                                                                                                                                                                                                                                                                                                                                                                                                        |         |
| Study design                 | 4       | Present key elements of study design early in the paper                                                                                                                                                                                                                                                                                                                                                                                                                | 5       |
| Setting                      | 5       | Describe the setting, locations, and relevant dates, including periods of recruitment, exposure, follow-up, and data collection                                                                                                                                                                                                                                                                                                                                        | 5       |
| Participants                 | 6       | (a) <i>Cohort study</i> —Give the eligibility criteria, and the sources and methods of selection of participants. Describe methods of follow-up<br><i>Case-control study</i> —Give the eligibility criteria, and the sources and methods of case ascertainment and control selection. Give the rationale for the choice of cases and controls<br><i>Cross-sectional study</i> —Give the eligibility criteria, and the sources and methods of selection of participants | 5       |
|                              |         | (b) <i>Cohort study</i> —For matched studies, give matching criteria and number of exposed and unexposed<br><i>Case-control study</i> —For matched studies, give matching criteria and the number of controls per case                                                                                                                                                                                                                                                 | 5       |
| Variables                    | 7       | Clearly define all outcomes, exposures, predictors, potential confounders, and effect modifiers. Give diagnostic criteria, if applicable                                                                                                                                                                                                                                                                                                                               | 5       |
| Data sources/<br>measurement | 8*      | For each variable of interest, give sources of data and details of methods of assessment (measurement). Describe comparability of assessment methods if there is more than one group                                                                                                                                                                                                                                                                                   | 5       |
| Bias                         | 9       | Describe any efforts to address potential sources of bias                                                                                                                                                                                                                                                                                                                                                                                                              | 5       |
| Study size                   | 10      | Explain how the study size was arrived at                                                                                                                                                                                                                                                                                                                                                                                                                              | 5-6     |
| Quantitative variables       | 11      | Explain how quantitative variables were handled in the analyses. If applicable, describe which groupings were chosen and why                                                                                                                                                                                                                                                                                                                                           | 5       |
| Statistical methods          | 12      | (a) Describe all statistical methods, including those used to control for confounding                                                                                                                                                                                                                                                                                                                                                                                  | 5       |
|                              |         | (b) Describe any methods used to examine subgroups and interactions                                                                                                                                                                                                                                                                                                                                                                                                    | 5       |
|                              |         | (c) Explain how missing data were addressed                                                                                                                                                                                                                                                                                                                                                                                                                            | 5       |
|                              | 12      | (d) <i>Cohort study</i> —If applicable, explain how loss to follow-up was addressed<br><i>Case-control study</i> —If applicable, explain how matching of cases and controls was addressed<br><i>Cross-sectional study</i> —If applicable, describe analytical methods taking account of sampling strategy                                                                                                                                                              | 5       |
|                              |         | (e) Describe any sensitivity analyses                                                                                                                                                                                                                                                                                                                                                                                                                                  | 5       |

Continued on next page

1  
2  
3  
4  
5  
6  
7  
8  
9  
10  
11  
12  
13  
14  
15  
16  
17  
18  
19  
20  
21  
22  
23  
24  
25  
26  
27  
28  
29  
30  
31  
32  
33  
34  
35  
36  
37  
38  
39  
40  
41  
42  
43  
44  
45  
46  
47  
48  
49  
50  
51  
52  
53  
54  
55  
56  
57  
58  
59  
60**Results**

|                  |     |                                                                                                                                                                                                              |      |
|------------------|-----|--------------------------------------------------------------------------------------------------------------------------------------------------------------------------------------------------------------|------|
| Participants     | 13* | (a) Report numbers of individuals at each stage of study—eg numbers potentially eligible, examined for eligibility, confirmed eligible, included in the study, completing follow-up, and analysed            | 6    |
|                  |     | (b) Give reasons for non-participation at each stage                                                                                                                                                         | n/a  |
|                  |     | (c) Consider use of a flow diagram                                                                                                                                                                           | n/a  |
| Descriptive data | 14* | (a) Give characteristics of study participants (eg demographic, clinical, social) and information on exposures and potential confounders                                                                     | 5-7  |
|                  |     | (b) Indicate number of participants with missing data for each variable of interest                                                                                                                          | 5-10 |
|                  |     | (c) <i>Cohort study</i> —Summarise follow-up time (eg, average and total amount)                                                                                                                             | 7    |
| Outcome data     | 15* | <i>Cohort study</i> —Report numbers of outcome events or summary measures over time                                                                                                                          | 4-9  |
|                  |     | <i>Case-control study</i> —Report numbers in each exposure category, or summary measures of exposure                                                                                                         |      |
|                  |     | <i>Cross-sectional study</i> —Report numbers of outcome events or summary measures                                                                                                                           |      |
| Main results     | 16  | (a) Give unadjusted estimates and, if applicable, confounder-adjusted estimates and their precision (eg, 95% confidence interval). Make clear which confounders were adjusted for and why they were included | 5-10 |
|                  |     | (b) Report category boundaries when continuous variables were categorized                                                                                                                                    |      |
|                  |     | (c) If relevant, consider translating estimates of relative risk into absolute risk for a meaningful time period                                                                                             |      |
| Other analyses   | 17  | Report other analyses done—eg analyses of subgroups and interactions, and sensitivity analyses                                                                                                               | 5-9  |

**Discussion**

|                  |    |                                                                                                                                                                            |       |
|------------------|----|----------------------------------------------------------------------------------------------------------------------------------------------------------------------------|-------|
| Key results      | 18 | Summarise key results with reference to study objectives                                                                                                                   | 10    |
| Limitations      | 19 | Discuss limitations of the study, taking into account sources of potential bias or imprecision. Discuss both direction and magnitude of any potential bias                 | 10    |
| Interpretation   | 20 | Give a cautious overall interpretation of results considering objectives, limitations, multiplicity of analyses, results from similar studies, and other relevant evidence | 10-11 |
| Generalisability | 21 | Discuss the generalisability (external validity) of the study results                                                                                                      | 11-14 |

**Other information**

|         |    |                                                                                                                                                               |    |
|---------|----|---------------------------------------------------------------------------------------------------------------------------------------------------------------|----|
| Funding | 22 | Give the source of funding and the role of the funders for the present study and, if applicable, for the original study on which the present article is based | 15 |
|---------|----|---------------------------------------------------------------------------------------------------------------------------------------------------------------|----|

\*Give information separately for cases and controls in case-control studies and, if applicable, for exposed and unexposed groups in cohort and cross-sectional studies.

**Note:** An Explanation and Elaboration article discusses each checklist item and gives methodological background and published examples of transparent reporting. The STROBE checklist is best used in conjunction with this article (freely available on the Web sites of PLoS Medicine at <http://www.plosmedicine.org/>, Annals of Internal Medicine at <http://www.annals.org/>, and Epidemiology at <http://www.epidem.com/>). Information on the STROBE Initiative is available at [www.strobe-statement.org](http://www.strobe-statement.org).
